# Supplementary material for: Precise and interpretable neural networks reveal epigenetic signatures of aging across youth in health and disease
Source: Front Aging. 2025 Jan 23;5:1526146. doi: 10.3389/fragi.2024.1526146 (PMC11799293; doi:10.3389/fragi.2024.1526146)
Supplement: Supplementary file 5 [file DataSheet6.xlsx]

## Sheet: NCAE-XY-Age
Supplementary File 6: DNAm signatures of aging from NCAE-XY-Age clock and classifier array.
Light-up delta values (NCAE-XY-Age)
CpG_ID	delta_pred_age_NCAE-XY-Age
cg27116819	-0.002395
cg18801599	-0.002115
cg06511389	-0.001762
cg26757053	-0.001684
cg18486102	-0.001625
cg12259256	-0.001616
cg26228266	-0.001608
cg02665570	-0.001584
cg21865533	-0.001556
cg08331313	-0.001544
ch.X.68408155R	-0.001532
cg13847066	-0.00148
cg18677101	-0.001474
cg07139440	-0.001471
cg10701282	-0.001466
cg26026416	-0.001461
cg12610207	-0.001418
cg01612366	-0.001393
cg04264908	-0.001391
cg23976499	-0.001389
cg11416243	-0.001385
cg14119437	-0.00138
cg18475643	-0.00137
cg16335762	-0.001368
cg25287257	-0.001357
cg10641615	-0.001354
cg27355456	-0.001351
cg09887589	-0.001346
cg17069739	-0.001336
cg05060949	-0.001313
cg00498591	-0.001311
ch.X.23343928R	-0.001307
cg04581613	-0.001303
cg25868286	-0.001292
cg21900495	-0.001291
cg06419432	-0.001284
ch.X.714485F	-0.001283
cg18759693	-0.001279
cg17491987	-0.001278
cg13622821	-0.001273
cg00662647	-0.001268
cg19753794	-0.001263
cg14284618	-0.001261
ch.X.42405548R	-0.001255
cg19337852	-0.001253
cg27315170	-0.001239
cg23000808	-0.001238
cg15394142	-0.001236
ch.X.57019131F	-0.001236
cg00973286	-0.001233
cg03218797	-0.001231
cg05412028	-0.001228
cg11150901	-0.001226
cg14417954	-0.001221
cg18202336	-0.001221
cg13767001	-0.00122
cg03603977	-0.001217
cg11900861	-0.001216
cg05423393	-0.001214
cg06822689	-0.001209
cg09655782	-0.001187
cg13836638	-0.001182
cg27188703	-0.00118
ch.X.97651759F	-0.001178
cg10061342	-0.001175
cg12427321	-0.001174
cg24770596	-0.001174
cg07976644	-0.001173
cg03065202	-0.001171
cg13482308	-0.001171
cg14097171	-0.00117
cg24354581	-0.001169
cg05327835	-0.001168
ch.X.2195099F	-0.001168
cg19323951	-0.001167
cg10946669	-0.001163
cg19388016	-0.001163
cg11382477	-0.001161
cg01020263	-0.00116
cg06940792	-0.00116
cg14900388	-0.001158
cg10316474	-0.001157
cg15579587	-0.001155
cg13247581	-0.001152
cg09182533	-0.001147
cg07751196	-0.001146
cg24638647	-0.001144
cg25291138	-0.001144
cg05966978	-0.001143
cg27118059	-0.001143
cg01196712	-0.001141
cg24671939	-0.001141
cg25957967	-0.001141
cg05626764	-0.00114
cg19924948	-0.00114
cg17468773	-0.001138
cg08879559	-0.001137
cg12155676	-0.001133
cg19019849	-0.001128
cg07859439	-0.001125
cg12224508	-0.00112
cg17671608	-0.001119
cg09669930	-0.001118
cg02323277	-0.001117
cg17661462	-0.001115
cg00702638	-0.001113
cg18892808	-0.001113
cg25058261	-0.001112
cg26760589	-0.001111
cg16681597	-0.001106
cg04739306	-0.001105
cg15665400	-0.001105
cg15153383	-0.001103
cg27347290	-0.001103
cg13930596	-0.001102
cg17573720	-0.001101
cg24862483	-0.0011
cg03061122	-0.001098
cg24315421	-0.001097
cg06508783	-0.001094
cg12228245	-0.001094
cg05742308	-0.001085
cg11696475	-0.001085
cg20707679	-0.001085
cg15745385	-0.001084
cg27279991	-0.001083
cg10316989	-0.001082
cg25183082	-0.001082
cg27493151	-0.001082
cg23736843	-0.00108
cg12897947	-0.001079
cg00035000	-0.001073
cg24228112	-0.001073
cg17441401	-0.001072
cg13441766	-0.001071
cg05825559	-0.001069
cg06433658	-0.001069
cg15711268	-0.001069
cg03468249	-0.001068
cg14598950	-0.001068
cg22306928	-0.001066
cg22104578	-0.001063
cg20383155	-0.001062
cg13510327	-0.00106
cg03191045	-0.001059
cg09284066	-0.001058
cg10587854	-0.001054
cg27141898	-0.001054
cg18937330	-0.001051
cg14693391	-0.001048
cg07690455	-0.001043
cg10576725	-0.001043
cg02632185	-0.001038
cg08441931	-0.001036
cg15757271	-0.001036
cg02194789	-0.001031
cg04472725	-0.001031
cg01287054	-0.00103
cg23173466	-0.00103
cg07890490	-0.001028
cg02730156	-0.001027
cg04808029	-0.001027
cg00215432	-0.001026
cg12403778	-0.001023
cg05443922	-0.001022
cg17353698	-0.001021
cg06947913	-0.00102
cg06073471	-0.001019
cg22888181	-0.001017
cg02470521	-0.001012
cg10946295	-0.001012
cg12851570	-0.001011
cg06356912	-0.001007
cg13844474	-0.001007
cg01901107	-0.001005
cg03466124	-0.001004
cg19789466	-0.001004
cg02553516	-0.001003
cg16655905	-0.001003
cg26069719	-0.001003
cg08230658	-0.001002
cg08218061	-0.001001
cg12178980	-0.001001
cg00343633	-0.0009997
cg05128414	-0.0009979
cg08118241	-0.0009956
cg00203089	-0.0009955
cg16463745	-0.0009946
cg05460949	-0.0009938
cg04658027	-0.0009933
cg08317263	-0.0009874
cg23037321	-0.0009872
cg00589371	-0.0009868
cg05893300	-0.000986
cg00765922	-0.0009855
cg00987461	-0.0009854
cg03245734	-0.0009846
cg05191175	-0.0009843
cg25578609	-0.0009841
cg02490736	-0.0009835
cg24427993	-0.0009832
cg09307284	-0.0009816
cg14715696	-0.0009812
cg04581938	-0.0009811
ch.X.56864533F	-0.0009809
cg14120010	-0.0009789
cg13506058	-0.0009783
cg15701237	-0.000977
cg17727929	-0.0009768
cg25666919	-0.0009752
cg08015883	-0.0009734
cg17421991	-0.0009728
cg12421686	-0.0009713
cg06118999	-0.0009707
cg08321576	-0.0009702
cg24526433	-0.0009688
cg08279008	-0.0009685
cg02825373	-0.0009684
cg04264549	-0.000968
cg22416703	-0.0009678
cg21424120	-0.0009673
cg13696940	-0.0009667
cg03694261	-0.0009664
cg23057706	-0.0009658
cg04227961	-0.0009653
cg14093715	-0.0009653
cg27542399	-0.0009645
cg01383799	-0.0009644
cg08372947	-0.0009643
cg12373208	-0.0009637
cg17475456	-0.0009635
cg13483603	-0.0009627
cg07392449	-0.0009623
cg19776351	-0.0009621
cg11225410	-0.0009619
cg15013019	-0.0009612
cg20133730	-0.0009612
cg09326404	-0.00096
cg22628281	-0.0009598
cg09720701	-0.0009595
cg21800284	-0.000959
cg14125468	-0.0009575
cg15090202	-0.0009573
cg06669276	-0.0009569
cg05065572	-0.0009568
cg25792714	-0.0009559
cg10501828	-0.0009556
cg14202679	-0.0009556
cg17572800	-0.0009554
cg14689219	-0.0009543
cg18422875	-0.0009542
cg26224223	-0.0009533
cg22827124	-0.0009531
cg24129626	-0.0009529
cg21487261	-0.000952
cg26720125	-0.0009519
cg07431286	-0.0009518
cg13071476	-0.0009511
cg09704750	-0.0009505
cg09476067	-0.0009503
cg07549208	-0.0009502
cg25587069	-0.0009495
cg22732101	-0.000949
cg06344807	-0.0009471
cg04879755	-0.0009465
cg20048434	-0.000945
cg23932491	-0.0009433
cg02946754	-0.0009429
cg08389577	-0.0009425
cg10673740	-0.0009425
cg27488824	-0.0009425
cg10555297	-0.0009423
cg05999287	-0.0009422
cg19949441	-0.0009418
cg26906217	-0.0009412
cg05009684	-0.0009409
cg01094748	-0.0009407
cg06894687	-0.0009406
cg21158502	-0.0009391
cg23583920	-0.0009385
cg09072162	-0.000938
cg18301048	-0.0009374
cg16202624	-0.0009365
cg06912966	-0.0009364
cg08491125	-0.0009352
cg11334818	-0.0009352
cg20091297	-0.0009352
cg20873416	-0.000935
cg22203219	-0.0009348
cg06802522	-0.0009344
cg11926776	-0.0009344
cg13593287	-0.0009341
cg16938490	-0.0009332
cg12373084	-0.0009324
cg04518912	-0.0009323
ch.X.92543860F	-0.0009311
cg16443866	-0.0009307
cg00523742	-0.0009295
cg25093503	-0.0009289
cg05162750	-0.0009282
cg23425079	-0.000927
cg00870849	-0.0009256
cg08675092	-0.0009251
cg26762347	-0.0009249
cg13209122	-0.0009247
cg12668399	-0.0009243
cg08988364	-0.000924
cg20778582	-0.0009235
cg12840248	-0.0009232
cg21008828	-0.0009228
cg00218447	-0.0009222
cg25913233	-0.0009213
cg20092531	-0.000921
cg03270395	-0.0009201
cg14547067	-0.0009194
cg10838664	-0.0009192
cg08811314	-0.0009184
cg11983576	-0.0009182
cg09197895	-0.000917
cg01802640	-0.0009168
cg17329249	-0.0009165
cg02466588	-0.000916
cg09143195	-0.0009138
cg02180498	-0.0009137
cg05807485	-0.0009136
cg15603311	-0.0009125
cg05613447	-0.0009123
cg27026360	-0.0009112
cg15802555	-0.0009107
cg12691620	-0.0009097
cg15677293	-0.0009096
cg08727193	-0.0009079
cg18051461	-0.0009075
cg10695848	-0.0009049
cg16115588	-0.0009047
cg01765249	-0.0009035
cg09677252	-0.0009034
cg13537353	-0.0009033
cg00085493	-0.0009028
cg03123370	-0.0009024
cg26089160	-0.0009021
cg01847719	-0.0009018
cg18363192	-0.0009015
cg26301565	-0.0009014
cg02071162	-0.0009003
cg11688275	-0.0009
cg16695758	-0.0008999
ch.X.13187220R	-0.0008994
cg04671462	-0.0008987
cg24027378	-0.0008987
cg04693928	-0.0008974
cg14434755	-0.0008965
cg21067540	-0.0008957
cg11162249	-0.0008954
cg26342671	-0.0008947
cg08903631	-0.0008946
cg04109220	-0.000894
cg13009608	-0.0008938
cg13573036	-0.0008926
cg06811478	-0.000892
cg24935042	-0.0008917
cg10984625	-0.0008909
cg01434608	-0.00089
cg25720755	-0.0008898
cg00805867	-0.0008895
cg07141055	-0.0008893
cg11631427	-0.0008874
cg00381411	-0.0008873
cg06043114	-0.0008862
cg23032936	-0.0008858
cg06959340	-0.0008851
cg15506157	-0.0008851
cg10896862	-0.0008849
cg20956278	-0.0008848
cg02219997	-0.0008842
cg19370653	-0.0008842
cg00064255	-0.0008841
cg16564033	-0.0008837
cg06383124	-0.0008829
cg20701689	-0.0008828
cg04784471	-0.0008824
cg20555674	-0.0008822
cg14305711	-0.000882
cg02283436	-0.0008819
cg24488739	-0.0008814
cg07392085	-0.000881
cg20971220	-0.0008808
cg23654971	-0.0008807
cg26924496	-0.0008799
cg08860607	-0.0008794
cg04072597	-0.0008789
cg11236727	-0.0008781
cg20024192	-0.000878
cg18043828	-0.0008774
cg06321883	-0.0008773
cg12804010	-0.0008771
cg14166485	-0.0008766
cg16453560	-0.0008766
cg15375239	-0.0008764
cg20631750	-0.0008764
cg15174823	-0.0008752
cg10971122	-0.0008743
cg08662757	-0.0008738
cg05419671	-0.0008736
cg26824216	-0.0008734
cg08041481	-0.000873
cg03321508	-0.0008729
cg10061361	-0.0008729
cg24610274	-0.0008729
cg19051416	-0.0008719
cg14048834	-0.000871
cg08151731	-0.0008703
cg03284866	-0.0008698
cg17287553	-0.0008697
cg18512156	-0.000869
cg22717014	-0.0008689
cg06869532	-0.0008685
cg18898440	-0.0008685
cg08105965	-0.0008684
cg15693066	-0.0008681
cg01061890	-0.0008679
cg11745019	-0.0008679
cg01122302	-0.0008675
cg09336988	-0.0008666
cg17837526	-0.0008665
cg02567488	-0.0008664
cg22112051	-0.000866
cg27000534	-0.0008655
cg24899205	-0.0008654
cg06422883	-0.0008652
cg25513173	-0.0008652
cg00030508	-0.0008644
cg01724607	-0.0008644
cg02560388	-0.0008636
cg00938619	-0.0008633
cg07616394	-0.0008633
cg20392842	-0.0008632
cg04904654	-0.0008629
cg11102611	-0.0008629
cg16660661	-0.0008621
cg22973042	-0.0008612
cg01721754	-0.0008611
cg08858649	-0.0008611
cg21881074	-0.0008608
cg17511968	-0.0008597
cg25090972	-0.0008594
cg09809276	-0.0008592
cg09029902	-0.0008591
cg22349573	-0.0008578
cg24757310	-0.0008577
cg14529474	-0.0008575
cg12347429	-0.0008573
cg17856830	-0.0008569
cg25282285	-0.0008569
cg06355830	-0.0008567
cg07302069	-0.0008565
cg06186698	-0.0008557
cg03735888	-0.0008553
cg12741255	-0.0008547
cg13458645	-0.0008536
cg05864433	-0.0008534
cg26160008	-0.0008529
cg07779120	-0.0008524
cg09263111	-0.0008522
cg14134732	-0.0008508
cg15847989	-0.0008508
cg19431881	-0.0008502
cg22116670	-0.0008493
cg10706230	-0.0008485
cg22830273	-0.0008483
cg07383443	-0.0008481
cg02105666	-0.000848
cg27305895	-0.0008479
cg12590051	-0.0008478
cg14484145	-0.0008476
cg08533745	-0.0008473
cg00275449	-0.000847
cg18379624	-0.0008469
cg24529280	-0.0008468
cg05895376	-0.0008466
cg06830784	-0.0008461
cg11482422	-0.0008461
cg20801464	-0.0008456
cg09379627	-0.0008454
cg06587155	-0.0008453
cg16518772	-0.000845
cg26416466	-0.000845
cg10846980	-0.0008449
cg19584803	-0.0008449
cg18443412	-0.0008441
cg05313771	-0.000844
cg14073922	-0.000844
cg20936892	-0.0008438
cg09599130	-0.0008434
cg25397718	-0.0008434
cg10328157	-0.0008431
cg25339566	-0.000843
cg09628838	-0.0008428
cg02172652	-0.0008427
cg13619915	-0.0008422
cg22289831	-0.0008416
cg05841627	-0.0008412
cg19105122	-0.0008403
cg04689061	-0.0008402
cg02602480	-0.0008401
cg26958524	-0.0008401
cg00651523	-0.0008395
cg23588086	-0.0008391
cg14849798	-0.000839
cg12223582	-0.0008389
cg15784124	-0.0008386
cg00940502	-0.0008382
cg25685519	-0.0008381
cg07527906	-0.000838
cg03025135	-0.0008379
cg06217245	-0.0008377
cg09441966	-0.0008377
cg03317463	-0.0008375
cg25799969	-0.0008373
cg21058520	-0.0008368
cg07309102	-0.0008366
cg20430847	-0.0008366
cg25588725	-0.0008359
cg11431957	-0.0008358
cg08521684	-0.0008357
cg11762306	-0.0008357
cg01130792	-0.0008356
cg15057061	-0.0008356
cg18405140	-0.0008355
cg10509187	-0.0008353
cg10891879	-0.0008349
cg09591663	-0.0008345
cg14832358	-0.0008342
cg15846787	-0.0008342
cg12134570	-0.0008341
cg03634479	-0.0008337
cg03128635	-0.0008336
cg05347845	-0.0008334
cg27059228	-0.0008326
cg12439439	-0.0008325
cg27428304	-0.0008324
cg09138445	-0.0008315
cg23661183	-0.0008314
cg13414478	-0.0008313
cg04249706	-0.0008304
cg10712561	-0.0008304
cg18924222	-0.0008302
cg01591431	-0.00083
cg00409917	-0.0008297
cg09740133	-0.0008296
cg20773651	-0.0008295
cg05015635	-0.0008289
cg16624692	-0.0008286
cg07941983	-0.0008285
cg24341498	-0.0008282
cg06320134	-0.000828
cg07654678	-0.000828
cg19737037	-0.0008279
cg20885179	-0.0008279
cg26685941	-0.0008278
cg00627241	-0.0008277
cg15668468	-0.0008277
cg10906552	-0.0008274
cg19790321	-0.0008274
cg00187933	-0.0008273
cg21238414	-0.0008272
cg00512280	-0.0008267
cg12659494	-0.0008267
cg20918957	-0.0008267
cg26217504	-0.0008262
cg02460251	-0.0008261
cg16653495	-0.0008258
cg02855924	-0.0008257
cg26835302	-0.0008253
cg04092393	-0.0008244
cg10585371	-0.0008236
cg07001963	-0.0008234
cg10591701	-0.0008232
cg17910375	-0.000823
cg23054321	-0.0008228
cg25029561	-0.0008222
cg09775260	-0.0008218
cg12563178	-0.0008216
cg05971894	-0.0008214
cg07112473	-0.0008213
cg10188897	-0.0008213
cg27409484	-0.000821
cg06001310	-0.0008209
cg15264808	-0.0008205
cg02201071	-0.0008203
cg12739584	-0.0008201
cg10638599	-0.00082
cg13395035	-0.0008198
cg00228390	-0.0008197
cg02753619	-0.0008194
cg15543281	-0.0008193
cg15734764	-0.0008191
cg00029826	-0.000819
cg01273287	-0.0008186
cg15299510	-0.0008185
cg11889808	-0.0008183
cg19006378	-0.000818
cg25924694	-0.0008179
cg11111460	-0.0008174
cg02446081	-0.0008165
cg20138458	-0.0008162
cg06903569	-0.000816
cg18351329	-0.0008159
cg07865517	-0.0008156
cg23781810	-0.0008153
cg03401096	-0.0008149
cg09265173	-0.0008148
cg24167037	-0.0008146
cg01768201	-0.0008145
cg14976276	-0.0008144
cg18601195	-0.0008141
cg10683055	-0.0008139
ch.X.557489R	-0.0008132
cg15069926	-0.0008131
cg03381047	-0.0008129
cg15687622	-0.0008129
cg26272270	-0.0008126
cg14750263	-0.0008121
cg17382198	-0.0008121
cg18351406	-0.0008121
cg25673948	-0.0008119
cg12898275	-0.0008117
cg11176924	-0.0008116
cg12930573	-0.0008116
cg10055139	-0.0008115
cg10415767	-0.000811
cg08863844	-0.0008107
cg11566061	-0.00081
cg02713524	-0.0008097
cg12114985	-0.0008094
cg21032292	-0.0008093
cg02126753	-0.0008092
cg02888113	-0.0008091
cg16010178	-0.0008091
cg01392544	-0.0008089
cg01216370	-0.0008088
cg02285263	-0.0008088
cg16681130	-0.0008088
cg08183307	-0.0008087
cg24682316	-0.0008087
cg05454501	-0.0008081
cg18221467	-0.0008081
cg20384898	-0.000808
cg23930334	-0.000808
cg13623135	-0.0008078
cg14219290	-0.0008078
cg22568403	-0.0008077
cg09365557	-0.0008074
cg12620499	-0.000807
cg02892153	-0.0008063
cg26437123	-0.0008056
cg26650655	-0.0008056
cg07039423	-0.0008051
cg09896120	-0.000805
cg26522946	-0.000805
cg02231295	-0.0008049
cg21913319	-0.0008044
cg22704326	-0.0008043
cg02401399	-0.000804
cg04411625	-0.0008036
cg22058990	-0.0008033
cg05706624	-0.0008032
cg08446692	-0.0008031
cg26386886	-0.000803
cg10126874	-0.0008028
cg02408775	-0.0008025
cg16622495	-0.0008017
cg24155190	-0.0008013
cg10040196	-0.0008012
cg16721977	-0.000801
cg05611351	-0.0008006
cg01662102	-0.0008005
cg03576419	-0.0007999
cg08750440	-0.0007994
cg15674580	-0.0007986
cg02919615	-0.0007984
cg13257514	-0.0007983
cg12206423	-0.0007982
cg03306024	-0.0007981
cg04261248	-0.000798
cg04564030	-0.000798
cg27292588	-0.0007979
cg12181083	-0.0007976
cg13904018	-0.0007973
cg03474731	-0.0007972
cg18443359	-0.000797
cg15035350	-0.0007969
cg06740227	-0.0007968
cg00506866	-0.0007966
cg00890041	-0.0007966
cg00167654	-0.0007962
cg08017990	-0.0007962
cg14595003	-0.0007958
cg18708013	-0.0007957
cg19395441	-0.0007957
cg16065186	-0.0007956
cg02303361	-0.0007955
cg26147372	-0.0007955
cg24865292	-0.0007952
cg00810208	-0.0007949
cg17916916	-0.0007948
cg19101547	-0.0007948
cg11301354	-0.0007946
cg11774227	-0.0007945
cg22097768	-0.0007945
cg25172604	-0.0007942
cg13355041	-0.0007928
cg24783356	-0.0007928
cg13756879	-0.0007926
cg23277376	-0.0007926
cg24878755	-0.0007926
cg27627209	-0.0007926
cg01141580	-0.0007924
cg14415616	-0.0007919
cg03470073	-0.0007916
cg25025437	-0.0007915
cg22727124	-0.0007912
cg11936643	-0.0007907
cg13070215	-0.0007906
cg16214267	-0.0007905
cg25452485	-0.0007905
cg11796442	-0.0007902
cg11369235	-0.0007901
cg27148665	-0.0007901
cg08900101	-0.00079
cg12255318	-0.0007899
cg25761326	-0.0007897
cg17210604	-0.0007896
cg05179038	-0.0007895
cg09213106	-0.0007894
cg21347053	-0.0007892
cg21929993	-0.0007892
cg11901188	-0.0007889
cg18782604	-0.0007888
cg23174932	-0.0007888
cg07688749	-0.0007887
cg02483484	-0.0007885
cg07753583	-0.0007885
cg26052635	-0.0007882
cg10515048	-0.0007881
cg17467525	-0.0007881
cg24129873	-0.0007878
cg02720618	-0.0007876
cg15460872	-0.0007869
cg04865841	-0.0007868
cg17027195	-0.0007865
cg00351011	-0.0007861
cg03935432	-0.0007858
cg22462010	-0.0007857
cg01645729	-0.0007855
cg09179485	-0.0007852
cg01016521	-0.0007848
cg07510230	-0.0007847
cg23252902	-0.0007847
cg07263178	-0.0007841
cg14065127	-0.0007841
cg09956907	-0.0007839
cg00707452	-0.0007837
cg03029127	-0.0007837
cg12681001	-0.0007836
cg15225091	-0.0007834
cg15454895	-0.0007833
cg16852892	-0.000783
cg03657573	-0.0007828
cg15971836	-0.0007825
cg17305834	-0.0007825
cg00678236	-0.0007824
cg17077639	-0.0007822
cg01648237	-0.0007815
cg24888989	-0.0007814
cg07751641	-0.0007813
cg10825398	-0.0007811
cg21273027	-0.0007811
cg27582625	-0.0007811
cg12591315	-0.000781
ch.X.153018199F	-0.000781
cg22885965	-0.0007807
cg13797825	-0.0007802
cg15490703	-0.0007795
cg05777976	-0.0007793
cg14258341	-0.0007793
cg00755950	-0.0007792
cg06818710	-0.000779
cg14039237	-0.0007786
cg20433906	-0.0007786
cg16709110	-0.0007784
cg20994254	-0.0007781
cg20207763	-0.0007779
cg22929859	-0.0007778
cg18015044	-0.0007774
cg13345957	-0.0007772
cg00495036	-0.000777
cg07962355	-0.0007768
cg06197769	-0.0007766
cg14320593	-0.0007766
cg14343381	-0.0007766
cg21571466	-0.0007764
cg21755725	-0.0007763
cg17149361	-0.000776
cg12159575	-0.0007752
cg25202636	-0.0007752
cg05291427	-0.0007751
cg22091037	-0.0007751
cg13567542	-0.0007747
cg11786870	-0.0007744
cg13833923	-0.0007738
cg23720064	-0.0007737
cg10824491	-0.0007735
cg06254440	-0.0007732
cg16358430	-0.000773
cg02651638	-0.0007728
cg08004525	-0.0007727
cg02043070	-0.0007726
cg17173451	-0.0007726
cg08803878	-0.0007724
cg20452714	-0.0007724
cg08687718	-0.0007717
cg25823373	-0.0007717
cg25449542	-0.0007716
cg19160520	-0.0007713
cg21726284	-0.0007711
cg17466857	-0.0007709
cg03276956	-0.0007707
cg10378804	-0.0007707
cg12502823	-0.0007706
cg12577010	-0.0007706
cg25870420	-0.0007703
cg11879741	-0.0007701
cg00922376	-0.0007699
cg03416628	-0.0007697
cg11664467	-0.0007697
cg17186066	-0.0007693
cg19657603	-0.0007693
cg05060704	-0.0007691
cg01048244	-0.0007689
cg14719951	-0.0007688
cg11256802	-0.0007687
cg00063828	-0.0007686
cg07723365	-0.0007685
cg11509269	-0.0007685
cg25635500	-0.0007683
cg02086310	-0.0007679
cg11467638	-0.0007679
cg12831102	-0.0007678
cg15571330	-0.0007676
cg08055087	-0.0007674
cg07993547	-0.000767
cg26472118	-0.0007668
cg16066797	-0.0007663
cg10817615	-0.0007662
cg17067190	-0.000766
cg08490791	-0.0007659
cg21938148	-0.0007658
cg12868173	-0.0007657
cg18852567	-0.0007656
cg26588825	-0.0007656
cg02964396	-0.0007655
cg13845094	-0.0007654
cg06688910	-0.0007653
cg15304404	-0.0007653
cg00401091	-0.0007651
cg18158151	-0.0007651
cg20637647	-0.0007649
cg26472133	-0.0007649
cg26657240	-0.0007648
cg04747226	-0.0007647
cg21359468	-0.0007646
cg24689196	-0.0007642
cg13945107	-0.0007641
cg03848675	-0.000764
cg20092046	-0.0007638
cg06305340	-0.0007634
cg07945335	-0.0007633
cg07703358	-0.0007632
cg11399100	-0.0007631
cg12219045	-0.0007631
cg15203735	-0.0007628
cg23155911	-0.0007628
cg21577472	-0.0007627
cg00055617	-0.0007625
cg16521978	-0.0007622
cg05165025	-0.0007621
cg07781736	-0.0007621
cg18396832	-0.0007621
cg04614296	-0.000762
cg21486944	-0.0007619
cg10110083	-0.0007616
cg22610211	-0.0007616
cg06263193	-0.0007613
cg10987597	-0.0007611
cg12526834	-0.0007609
cg17480467	-0.0007606
cg18895413	-0.0007602
cg09704109	-0.0007601
cg14041069	-0.0007601
cg12598524	-0.00076
cg02829783	-0.0007595
cg05683227	-0.0007595
cg17739038	-0.0007594
ch.X.92435715F	-0.0007594
cg20943461	-0.0007593
cg26288249	-0.000759
cg05867154	-0.0007589
cg20308679	-0.0007589
cg19245371	-0.0007585
cg08404009	-0.000758
cg04713327	-0.0007576
cg04194852	-0.0007575
cg12539796	-0.0007573
cg09263516	-0.0007572
cg17274953	-0.000757
cg01312858	-0.0007566
cg17604407	-0.0007566
cg20724810	-0.0007566
cg01740172	-0.0007563
cg08170757	-0.0007563
cg25726080	-0.0007563
cg04675539	-0.0007559
cg05731870	-0.0007559
cg24740587	-0.0007557
cg05732979	-0.0007556
cg11608897	-0.0007555
cg26506288	-0.000755
cg01422262	-0.0007545
cg19109608	-0.0007542
cg26785154	-0.0007539
cg01635193	-0.0007535
cg24794347	-0.0007534
ch.X.97133160R	-0.0007533
cg17026879	-0.0007532
cg18497394	-0.0007532
cg22331108	-0.0007532
cg01954683	-0.0007531
cg11223365	-0.0007531
cg18303028	-0.000753
cg13092806	-0.0007529
cg26817935	-0.0007528
cg03483267	-0.0007527
cg08624680	-0.0007527
cg11594940	-0.0007526
cg00119057	-0.0007525
cg26635603	-0.0007523
cg19120897	-0.0007519
cg25776467	-0.0007519
cg13299776	-0.0007518
cg09699369	-0.0007515
cg20432671	-0.0007513
cg16837769	-0.0007512
cg18630040	-0.0007511
cg21735714	-0.0007507
cg04154825	-0.0007506
cg11638980	-0.0007506
cg04173714	-0.0007505
cg07347092	-0.0007505
cg12705762	-0.0007505
cg10164592	-0.0007504
cg25564800	-0.0007504
cg13145750	-0.0007503
cg23672395	-0.0007496
cg25789861	-0.0007495
cg26734696	-0.0007493
cg07107824	-0.0007491
cg01699584	-0.000749
cg06471230	-0.0007488
cg23967554	-0.0007488
cg23820885	-0.0007487
cg22016779	-0.000748
cg26515586	-0.0007479
cg16572315	-0.0007477
cg07522981	-0.0007472
cg13123964	-0.0007472
cg14552376	-0.0007471
cg26332926	-0.0007469
cg15056288	-0.0007468
cg15464821	-0.0007468
cg15579822	-0.0007463
cg17507671	-0.0007462
cg20525088	-0.0007458
cg00450784	-0.0007456
cg10213924	-0.0007452
cg03524572	-0.0007451
cg16302790	-0.0007451
cg16612998	-0.000745
cg16782807	-0.0007448
cg16716750	-0.0007447
cg18352516	-0.0007445
cg19058189	-0.0007445
cg21974358	-0.0007443
cg09682311	-0.0007442
cg04596060	-0.0007437
cg11362010	-0.0007435
cg21107197	-0.0007435
cg23651798	-0.0007433
cg13898357	-0.0007432
cg14989642	-0.0007432

## Sheet: NCAE-XY-Age classifier array
Supplementary File 6: DNAm signatures of aging from NCAE-XY-Age clock and classifier array.
Light-up delta values (NCAE-XY-Age classifier array)
CpG_ID_12	delta_prob_estim_NCAE-XY-Age_12	CpG_ID_13	delta_prob_estim_NCAE-XY-Age_13	CpG_ID_14	delta_prob_estim_NCAE-XY-Age_14	CpG_ID_15	delta_prob_estim_NCAE-XY-Age_15	CpG_ID_16	delta_prob_estim_NCAE-XY-Age_16	CpG_ID_17	delta_prob_estim_NCAE-XY-Age_17	CpG_ID_18	delta_prob_estim_NCAE-XY-Age_18	CpG_ID_19	delta_prob_estim_NCAE-XY-Age_19	CpG_ID_20	delta_prob_estim_NCAE-XY-Age_20	CpG_ID_21	delta_prob_estim_NCAE-XY-Age_21	CpG_ID_22	delta_prob_estim_NCAE-XY-Age_22	CpG_ID_23	delta_prob_estim_NCAE-XY-Age_23	CpG_ID_24	delta_prob_estim_NCAE-XY-Age_24	CpG_ID_25	delta_prob_estim_NCAE-XY-Age_25	CpG_ID_26	delta_prob_estim_NCAE-XY-Age_26
cg03245734	-0.002759	cg05412028	-0.004251	cg16789592	-0.00112	cg01769037	-0.009489	cg19753794	-0.002274	cg16789592	-0.004369	cg26394940	-0.01646	cg03324578	-0.006056	cg27116819	-0.008385	cg23032936	-0.01726	cg27116819	-0.01038	cg03324578	-0.0118	cg01769037	-0.01461	cg01769037	-0.00778	cg14714537	-0.008999
cg01612366	-0.002587	cg22863920	-0.004201	cg11153400	-0.00103	cg04609859	-0.00784	cg05412028	-0.002197	ch.X.2195099F	-0.004335	cg11153400	-0.01544	cg16789592	-0.005568	cg06511389	-0.007488	cg01612366	-0.01664	cg06511389	-0.009435	cg27627209	-0.01113	ch.X.23343928R	-0.01124	cg25172604	-0.006412	ch.X.2195099F	-0.008897
cg02716635	-0.002544	cg01612366	-0.003974	cg26394940	-0.001001	cg27116819	-0.007419	cg16789592	-0.002109	cg05412028	-0.003899	cg03324578	-0.01527	cg26394940	-0.005424	cg03324578	-0.007047	cg03324578	-0.0165	cg13483603	-0.009118	cg23060390	-0.01102	cg03324578	-0.01089	cg23060390	-0.005959	cg06688910	-0.008844
cg21865533	-0.002521	cg01491219	-0.003944	cg05412028	-0.0009114	cg27326452	-0.007304	cg17215036	-0.001991	cg27116819	-0.003739	cg06688910	-0.01377	cg11153400	-0.005219	cg16789592	-0.00702	cg07139440	-0.01622	cg01612366	-0.008839	cg26394940	-0.01059	cg12439977	-0.01076	cg27627209	-0.005835	cg24374161	-0.008464
cg16789592	-0.002478	cg11153400	-0.003881	cg05951576	-0.0009074	cg18801599	-0.00721	cg03065202	-0.001969	ch.X.87262228F	-0.003507	cg16789592	-0.01362	cg23032936	-0.005106	cg26394940	-0.006784	cg27627209	-0.01616	cg27627209	-0.008593	cg13483603	-0.01054	cg23060390	-0.01071	cg08244848	-0.005753	cg25172604	-0.008436
cg02408775	-0.002473	cg16789592	-0.00382	cg09285095	-0.0008502	cg27141898	-0.007204	cg13475583	-0.001957	cg02408775	-0.003441	cg27627209	-0.0134	cg21865533	-0.004868	cg06998282	-0.006677	cg13483603	-0.01607	cg18801599	-0.008335	cg06688910	-0.01038	cg25957967	-0.01058	cg15394142	-0.005743	cg23060390	-0.007921
cg00397479	-0.002468	cg00343092	-0.003769	cg25999578	-0.0008475	cg16789592	-0.007102	cg11153400	-0.001946	cg10695848	-0.003426	cg05412028	-0.01295	cg00035000	-0.004785	cg05951576	-0.006645	cg02632185	-0.01564	cg16789592	-0.00826	cg00498591	-0.01013	cg08811314	-0.01048	cg24374161	-0.005735	ch.X.97651759F	-0.007894
cg14093715	-0.002441	cg23201812	-0.003768	cg24770596	-0.0008393	cg10406027	-0.006915	cg26493353	-0.001945	ch.X.23343928R	-0.003419	cg00448761	-0.01224	cg05412028	-0.004677	cg18801599	-0.006504	cg17491987	-0.01555	cg21032292	-0.00803	cg11153400	-0.01005	ch.X.2195099F	-0.01047	cg14714537	-0.00565	cg27627209	-0.007804
cg18665871	-0.002408	cg01000615	-0.003761	cg13475583	-0.0008374	cg23922454	-0.006774	cg06679694	-0.001932	cg11153400	-0.003418	cg14714537	-0.01212	cg17837526	-0.004671	cg06688910	-0.006341	cg18148130	-0.01539	cg11203397	-0.007984	cg17837526	-0.009912	cg25172604	-0.01042	cg07905444	-0.005627	cg26394940	-0.007719
cg02236650	-0.002382	cg04525491	-0.003745	cg18665871	-0.0008246	cg20392842	-0.006685	cg26394940	-0.001854	cg05951576	-0.003391	cg22783363	-0.01182	cg06688910	-0.004546	cg01909921	-0.00629	cg15203735	-0.01503	cg18748525	-0.007856	cg14579997	-0.009692	cg13483603	-0.01028	cg13836518	-0.005417	cg26022183	-0.00758
cg19753794	-0.002361	cg21865533	-0.003671	cg22783363	-0.0008245	cg14710552	-0.006654	cg03324578	-0.001821	cg24610274	-0.00331	cg05951576	-0.01163	cg17215036	-0.00441	cg04739306	-0.006272	cg27116819	-0.01489	cg23060390	-0.007763	cg05412028	-0.009301	cg12224508	-0.01015	cg27116819	-0.005386	cg10905180	-0.007422
cg10695848	-0.002354	cg03245734	-0.003644	cg27326452	-0.0008211	cg00343092	-0.006635	cg07463059	-0.001818	cg06688910	-0.003309	cg09285095	-0.01162	cg27116819	-0.004323	cg11153400	-0.006238	cg11203397	-0.01476	cg05951576	-0.007733	cg04636841	-0.008872	cg24228112	-0.0101	cg21032292	-0.005324	cg27116819	-0.007415
cg24902920	-0.002336	cg26216433	-0.003638	cg14093715	-0.0008057	cg26835302	-0.006587	cg04636841	-0.00175	cg26394940	-0.003296	cg17837526	-0.01162	cg15369821	-0.004315	cg17837526	-0.00606	cg21865533	-0.0145	cg25172604	-0.007545	cg11926776	-0.008819	cg25442239	-0.01008	cg16801374	-0.005284	cg17572800	-0.007398
cg02161478	-0.002327	cg25999578	-0.003501	cg12530994	-0.0008015	cg13209122	-0.006567	cg25524962	-0.001739	cg26846424	-0.003221	cg19337852	-0.0116	cg01909921	-0.004288	cg21865533	-0.005901	cg06688910	-0.01447	cg08122140	-0.007356	cg27116819	-0.008565	cg18664369	-0.01003	cg25957967	-0.005262	cg05412028	-0.007371
cg21577472	-0.002321	cg06419432	-0.003454	cg06621373	-0.0007976	cg05412028	-0.006507	cg08604594	-0.001727	cg09845785	-0.003217	cg23032936	-0.01123	cg23928165	-0.004276	cg05412028	-0.005889	cg26394940	-0.0144	cg07091207	-0.007306	cg25442239	-0.008541	cg27116819	-0.00997	cg19924948	-0.005255	cg24526433	-0.007173
cg09029902	-0.002305	cg02716635	-0.003451	cg11549953	-0.0007922	cg05443922	-0.006505	cg23201812	-0.001721	cg15996480	-0.003217	cg06998282	-0.01114	cg00343092	-0.004222	cg02119927	-0.005795	cg05412028	-0.01417	cg12439977	-0.007191	cg07905444	-0.008524	cg27627209	-0.009936	cg14119437	-0.005252	cg25442239	-0.007124
cg05412028	-0.002302	cg09012544	-0.003445	cg26216433	-0.0007847	cg13475583	-0.006422	cg06419432	-0.001711	cg00343092	-0.003216	cg15369821	-0.01106	cg24610274	-0.004222	cg18148130	-0.005783	cg08604594	-0.01408	cg04636841	-0.007186	cg18148130	-0.008461	cg07463059	-0.009873	cg25442239	-0.005227	ch.X.23343928R	-0.007025
cg12206423	-0.002272	cg16146033	-0.003425	cg12391352	-0.0007779	cg11153400	-0.006395	cg06688910	-0.001707	cg03245734	-0.003206	cg23928165	-0.01099	cg20641465	-0.004152	cg01612366	-0.005734	cg15369821	-0.01396	cg18148130	-0.007162	cg25172604	-0.008411	cg00035000	-0.009826	cg10501828	-0.005199	cg00498591	-0.007022
cg03065202	-0.002233	cg26394940	-0.003407	cg14919554	-0.0007779	cg26394940	-0.006356	cg02097309	-0.001702	ch.X.1282647F	-0.003205	cg21865533	-0.01092	cg18148130	-0.004147	cg00343092	-0.005711	cg11153400	-0.01389	cg20721917	-0.007159	cg15369821	-0.008407	cg11831003	-0.009816	cg10932907	-0.005162	cg09655782	-0.006996
cg11153400	-0.002228	cg24610274	-0.003396	cg09845785	-0.0007747	cg02535219	-0.006316	cg04109822	-0.001694	cg17215036	-0.003158	cg27116819	-0.01084	cg08321576	-0.004089	cg23525243	-0.005673	cg25442239	-0.01377	cg05412028	-0.007138	cg17601658	-0.008212	cg13767001	-0.009799	cg21402832	-0.005156	cg08369079	-0.006874
cg20117153	-0.002223	cg00680551	-0.003388	cg21865533	-0.000773	cg26525127	-0.006293	cg07091207	-0.001683	ch.X.68408155R	-0.003137	cg06162038	-0.01077	cg15203735	-0.004018	cg09467501	-0.005587	cg02964396	-0.01365	cg11857997	-0.007132	ch.X.714485F	-0.008162	ch.X.714485F	-0.009795	cg03245734	-0.005132	cg25957967	-0.006757
cg11983576	-0.002222	cg06162038	-0.003354	cg26835302	-0.0007699	cg09285095	-0.006255	cg05893300	-0.001653	ch.X.57019131F	-0.00311	cg00268086	-0.01075	cg05951576	-0.004003	cg00035000	-0.005547	cg17837526	-0.01364	cg00498591	-0.007131	cg14714537	-0.008068	cg26394940	-0.009771	cg25924694	-0.005125	cg11153400	-0.006686
cg23201812	-0.002219	cg02315271	-0.003345	cg00343092	-0.0007626	cg06621373	-0.006248	cg17586256	-0.001646	cg20641465	-0.00306	cg17491987	-0.01069	cg07463059	-0.00399	cg23032936	-0.005478	cg16335762	-0.01341	cg05419671	-0.007102	cg06511389	-0.008045	cg00498591	-0.009661	cg26426447	-0.005093	cg26505691	-0.006686
cg14707269	-0.002213	cg14093715	-0.003338	cg10406027	-0.000761	cg22863920	-0.006224	cg03245734	-0.001642	cg11342670	-0.002968	cg06508783	-0.01068	cg06679694	-0.003921	cg06508783	-0.005452	cg01422262	-0.0134	cg03065202	-0.007052	ch.X.23343928R	-0.007918	cg01612366	-0.009625	cg00577865	-0.005088	cg14060111	-0.006616
cg22104578	-0.002208	cg14120215	-0.003321	cg12319602	-0.00076	cg07382943	-0.006044	cg00500522	-0.001631	cg13453904	-0.002966	cg00241638	-0.01062	cg17601658	-0.003918	cg11857997	-0.005367	cg09655782	-0.01337	cg11926776	-0.007017	cg22790973	-0.007917	cg08604594	-0.009567	cg09723781	-0.005086	cg09978533	-0.006592
cg09845785	-0.002195	cg19597031	-0.00331	cg22782986	-0.000759	cg02380334	-0.006028	cg20383155	-0.001628	cg00680551	-0.002959	cg26216433	-0.01062	cg01612366	-0.003917	cg12439977	-0.005343	cg06508783	-0.0133	cg25868286	-0.006995	cg26916780	-0.007902	cg18094824	-0.009382	cg06688910	-0.005049	cg03245734	-0.006564
cg27315170	-0.002187	cg11549953	-0.003308	cg12717594	-0.0007586	cg12577010	-0.005993	cg02632185	-0.001623	cg17415265	-0.002954	cg03834031	-0.01059	cg09285095	-0.003901	cg17415265	-0.005314	cg07091207	-0.01328	cg14219290	-0.006968	cg26426447	-0.007898	cg23032936	-0.00938	cg20430847	-0.005015	cg23954922	-0.006544
cg05895376	-0.002186	cg09285095	-0.003301	cg06688910	-0.0007477	cg04118888	-0.005964	cg11612617	-0.001621	cg10553088	-0.002941	cg17163527	-0.01059	cg02119927	-0.003888	cg23778363	-0.005276	cg11926776	-0.01322	cg21865533	-0.006837	cg08122140	-0.007886	cg04609859	-0.009345	cg13914324	-0.005011	ch.X.42405548R	-0.006472
cg17837526	-0.002183	cg03143164	-0.00329	cg16653495	-0.0007421	cg23778363	-0.00594	cg09285095	-0.001612	cg01612366	-0.002936	cg25851152	-0.01056	cg06508783	-0.003875	cg12373208	-0.005145	cg25172604	-0.01315	cg22832061	-0.006798	cg11084266	-0.007842	cg10501828	-0.009334	cg27326452	-0.004976	cg16173191	-0.006471
cg23535596	-0.002169	cg18891712	-0.00329	cg00498591	-0.0007402	cg25522119	-0.005909	cg00397479	-0.001609	cg10753610	-0.002922	cg00343092	-0.01051	cg06998282	-0.003817	cg04770088	-0.005131	cg07463059	-0.01314	ch.X.714485F	-0.006748	cg06508783	-0.007833	cg03065202	-0.009313	cg26394940	-0.004964	cg17837526	-0.006415
cg25999578	-0.002164	cg10406027	-0.003283	cg27458485	-0.0007387	cg26607828	-0.005862	ch.X.2195099F	-0.001609	cg01312858	-0.002882	cg18179075	-0.0105	cg03834031	-0.003816	cg17215036	-0.005129	cg23060390	-0.01306	cg24770596	-0.006741	cg14710552	-0.007752	cg08325519	-0.009287	cg19789466	-0.004905	cg08244848	-0.00633
cg13498289	-0.002153	cg15394142	-0.003273	cg04134048	-0.0007347	cg05015635	-0.005854	cg23032936	-0.001602	cg10713589	-0.002876	cg21577472	-0.01049	cg06511389	-0.003733	cg04228935	-0.005123	cg11084266	-0.01304	cg07443287	-0.00673	cg24526433	-0.007684	cg10932907	-0.009237	cg11926776	-0.004902	cg16146033	-0.006317
cg06197769	-0.002148	cg08010362	-0.00327	cg18261069	-0.0007323	cg10576280	-0.005842	cg17820591	-0.001598	cg15369821	-0.002862	cg05573381	-0.01047	cg12439977	-0.003713	cg26762347	-0.005111	cg26916780	-0.01299	cg19337852	-0.006716	cg18094824	-0.007648	cg11225410	-0.009225	cg00498591	-0.004896	cg23712359	-0.006314
cg06254440	-0.00214	cg09845785	-0.003263	cg06254440	-0.0007298	cg16938490	-0.005839	cg24577193	-0.001588	cg00241638	-0.002852	cg17104258	-0.01046	cg07091207	-0.003699	cg09182533	-0.00511	cg08230658	-0.01293	cg07859439	-0.006699	cg01899130	-0.007644	cg18880897	-0.009169	cg18892169	-0.004892	cg16335762	-0.006279
cg06685968	-0.00213	cg14919554	-0.003251	cg06303772	-0.0007282	cg14714537	-0.005828	cg17415265	-0.001586	cg04770088	-0.002847	cg25442239	-0.01039	cg15394142	-0.003699	cg05573381	-0.005036	cg00765922	-0.01285	cg13767001	-0.006671	cg11857997	-0.007575	cg08321576	-0.009165	cg22104578	-0.004891	cg27624424	-0.006272
cg06688910	-0.002127	cg06034933	-0.003224	cg03245734	-0.000727	cg18665871	-0.005817	cg07139440	-0.001561	ch.X.108369489R	-0.002843	cg02481642	-0.01032	cg04739306	-0.003674	cg02656741	-0.004982	cg16762778	-0.01273	cg14579997	-0.006636	cg08317263	-0.00757	cg15369821	-0.009142	cg17468773	-0.004866	cg12530994	-0.006258
cg08517286	-0.00212	cg18479593	-0.003215	cg11026555	-0.0007235	cg06162038	-0.005787	cg10553088	-0.001559	cg04313875	-0.002819	cg17415265	-0.01031	cg04636841	-0.003642	cg07091207	-0.004974	cg07859439	-0.0127	cg02298094	-0.006631	cg02656741	-0.007562	cg14426428	-0.009101	cg19337852	-0.004864	ch.X.938089F	-0.006225
cg13475583	-0.002108	cg05027458	-0.003185	cg15042080	-0.0007233	cg13847066	-0.005768	cg24610274	-0.001559	cg06679694	-0.002812	cg07905444	-0.0103	cg21011133	-0.003635	cg26487948	-0.004942	cg03741862	-0.01263	cg11084266	-0.006527	cg01797371	-0.007508	cg17521583	-0.008931	cg23173466	-0.00486	cg23683528	-0.006224
cg03324578	-0.002105	cg03186333	-0.003184	cg19597031	-0.0007174	cg03854765	-0.005763	cg04728480	-0.001554	cg14597534	-0.00281	cg09978533	-0.0103	cg05643592	-0.003626	cg15369821	-0.004914	cg24526433	-0.0126	cg06688910	-0.006502	ch.X.1282647F	-0.00743	cg09899173	-0.008904	cg08369079	-0.004856	cg05648303	-0.006216
cg15369821	-0.002105	cg06688910	-0.003169	cg16146033	-0.0007104	cg22783363	-0.00575	cg16957313	-0.001552	cg26216433	-0.0028	cg23595222	-0.01029	cg06419432	-0.003624	cg09845785	-0.00486	cg20918957	-0.01258	cg06508783	-0.006476	cg00577865	-0.007395	cg21395152	-0.00884	cg16335762	-0.004788	cg13483603	-0.006201
cg07941983	-0.002096	cg11776014	-0.003151	cg18801599	-0.0007077	cg24610274	-0.005724	cg11342670	-0.001549	ch.X.120845377F	-0.002797	cg00498591	-0.01017	cg26762347	-0.003617	cg17601658	-0.004831	cg04174211	-0.01255	cg03324578	-0.006464	cg12530994	-0.007379	cg27086308	-0.008811	cg18148130	-0.004779	cg04301104	-0.006196
cg09415272	-0.002094	cg15744359	-0.003148	cg27116819	-0.0007062	cg06419432	-0.005698	cg03910065	-0.001541	cg15177071	-0.002795	cg04770088	-0.01015	cg17415265	-0.003612	cg18664369	-0.004816	cg16789592	-0.0125	cg26426447	-0.00645	cg19337852	-0.007376	cg24531915	-0.008774	cg08711067	-0.004753	cg16356456	-0.006161
cg18479593	-0.002092	cg14597534	-0.003147	cg05318142	-0.0007047	ch.X.2195099F	-0.005698	cg05226168	-0.001539	cg05966978	-0.002794	cg04636841	-0.01013	cg00241638	-0.003596	cg25287071	-0.004808	cg00448761	-0.01246	cg09467501	-0.006424	cg24811290	-0.007346	cg17837526	-0.008756	cg18094824	-0.004744	cg19431881	-0.006123
cg11612617	-0.00209	cg18396832	-0.003143	cg25110126	-0.0006983	cg14093715	-0.005691	cg13483603	-0.001539	cg12224508	-0.002793	cg04138112	-0.0101	cg04770088	-0.003578	cg04636841	-0.004782	cg12526298	-0.01232	cg00765922	-0.006389	cg09978533	-0.007312	cg11153400	-0.00874	cg01612366	-0.004743	cg14119437	-0.006106
cg26394940	-0.002082	cg26653360	-0.003123	cg08079596	-0.0006947	cg07091207	-0.005682	cg17601658	-0.001539	cg02161478	-0.002779	cg19422030	-0.01007	cg25110126	-0.00356	cg03741862	-0.004781	cg03834031	-0.01226	cg18179075	-0.00638	cg17276002	-0.00728	ch.X.42405548R	-0.008731	cg04609859	-0.004743	cg05893300	-0.006086
cg21235151	-0.00208	cg06685968	-0.003122	cg23201812	-0.0006944	cg04877910	-0.005617	cg15778012	-0.001535	cg04593780	-0.002775	cg08604594	-0.01	cg12390895	-0.003559	cg02667677	-0.004753	cg11831003	-0.01226	cg11153400	-0.006367	cg03834031	-0.007276	cg06679694	-0.008722	cg27234864	-0.004714	cg11150901	-0.006018
cg20392842	-0.002076	cg03065202	-0.003104	cg06419432	-0.0006882	cg23533683	-0.005596	cg02408775	-0.001528	cg06511389	-0.002766	cg18148130	-0.00994	cg26216433	-0.003557	cg21359747	-0.004749	cg22790973	-0.01221	cg12155676	-0.006365	cg09166091	-0.007265	cg17601658	-0.008664	cg03324578	-0.004702	cg02481642	-0.005994
cg14119437	-0.002075	cg03167413	-0.003104	cg14714537	-0.0006875	cg08604594	-0.005593	cg18363192	-0.001528	cg04509074	-0.002755	cg23244022	-0.009934	cg11203397	-0.00354	cg25868286	-0.004746	cg11225410	-0.01219	cg02097309	-0.006308	cg00343092	-0.007259	cg03848675	-0.008652	cg19383430	-0.00468	cg03834031	-0.005967
cg08988364	-0.002071	cg26657240	-0.003104	cg15079315	-0.000682	cg26216433	-0.005579	cg27315170	-0.001524	cg09467501	-0.002755	cg26916780	-0.00991	cg10951873	-0.003537	cg00241638	-0.004744	cg19924948	-0.01218	cg21697198	-0.006308	cg07217350	-0.007251	cg05412028	-0.008586	cg26824216	-0.004665	cg11203397	-0.005939
cg13510327	-0.00207	cg11203397	-0.00309	cg04525491	-0.0006817	cg26824216	-0.005573	cg20641465	-0.00152	cg03324578	-0.002751	cg26493353	-0.009904	cg11612617	-0.003511	cg07905444	-0.004734	cg19337852	-0.01215	cg17215036	-0.006263	ch.X.938089F	-0.007228	cg19789466	-0.008501	cg14539393	-0.004642	cg11831003	-0.005936
cg12390895	-0.002066	cg21235151	-0.003089	cg06511389	-0.0006814	cg16547579	-0.005547	cg23174932	-0.001517	cg08604594	-0.002738	cg20943039	-0.009897	cg07859439	-0.003495	cg08372947	-0.004734	cg00268086	-0.01209	cg23032936	-0.006249	cg17491987	-0.007216	cg09655782	-0.00846	cg13482308	-0.004637	cg14710552	-0.005936
cg11018337	-0.002065	cg23032936	-0.003075	cg17837526	-0.0006808	cg06511389	-0.005526	cg13683218	-0.001512	cg03030717	-0.002724	cg17215036	-0.009876	cg09845785	-0.003482	cg00498591	-0.004663	cg17480467	-0.01209	cg24526433	-0.006214	cg14206898	-0.007208	cg04636841	-0.008397	cg03848675	-0.004632	cg17468773	-0.005919
cg06419432	-0.002059	cg16368750	-0.003062	cg08604594	-0.0006785	cg00035000	-0.005524	cg05951576	-0.001506	ch.X.97651759F	-0.002723	cg07859439	-0.009811	cg16855845	-0.003472	cg02052895	-0.004646	cg25851152	-0.01202	cg05645404	-0.00619	cg08604594	-0.007201	cg06508783	-0.008384	cg12390895	-0.004624	cg22956254	-0.005911
cg01312858	-0.002058	cg23708763	-0.003049	cg03657573	-0.0006782	cg06254440	-0.005517	cg04593780	-0.001502	cg21430685	-0.002722	cg02408775	-0.009797	cg17104258	-0.003472	cg19337852	-0.004645	cg17601658	-0.01196	cg17956079	-0.006188	cg16468729	-0.007134	cg15394142	-0.008346	cg23415756	-0.004618	cg11926776	-0.005892
cg03167413	-0.002057	cg13495369	-0.003046	cg03834031	-0.0006781	cg06318274	-0.005485	cg21865533	-0.001498	cg06818532	-0.002711	cg02656741	-0.009752	cg01422262	-0.00347	cg25172604	-0.004633	cg01094748	-0.01194	cg02427330	-0.006156	cg18179075	-0.007096	ch.X.68408155R	-0.008262	cg11594940	-0.004613	cg19584803	-0.005867
cg08218061	-0.002043	cg22782986	-0.003042	cg00397479	-0.000678	cg05951576	-0.00547	cg11424456	-0.001496	cg09453760	-0.0027	cg04134048	-0.009728	cg13498289	-0.003466	cg18748525	-0.004619	cg06741198	-0.01192	cg21402832	-0.006126	cg22832061	-0.007091	cg13836518	-0.0082	cg11831003	-0.004613	cg01901107	-0.005864
cg25439632	-0.00203	cg05951576	-0.00302	cg18565473	-0.0006775	cg08218061	-0.005468	cg19523213	-0.001496	cg16368750	-0.0027	cg09467501	-0.009601	cg02481642	-0.003447	cg03834031	-0.004618	cg06713116	-0.0119	cg08727535	-0.006115	cg04109822	-0.007075	cg11926776	-0.008192	cg10685559	-0.004609	cg12577010	-0.005859
cg23520930	-0.002028	cg17130457	-0.003016	cg10626816	-0.0006761	cg08811314	-0.005457	cg03287340	-0.001494	cg16223546	-0.002698	cg00785738	-0.009585	cg23595222	-0.003432	cg24369185	-0.004568	cg19793905	-0.01184	cg13914324	-0.006089	cg07174665	-0.007075	cg20495404	-0.008167	cg10817615	-0.004607	ch.X.57019131F	-0.005852
cg11500660	-0.002026	cg16978914	-0.003007	cg12206423	-0.0006739	cg10040922	-0.005447	cg11624479	-0.001494	cg09285095	-0.002688	cg08079596	-0.009519	cg00268086	-0.003429	cg12024828	-0.004538	ch.X.714485F	-0.01173	cg11936643	-0.006084	cg23595222	-0.007062	cg20430847	-0.008152	cg05191175	-0.004592	cg04100595	-0.005846
cg11026555	-0.002023	cg15203735	-0.003	cg06162038	-0.0006733	cg12036735	-0.00544	cg19337852	-0.001489	cg17491987	-0.002686	cg09693106	-0.009472	cg03217795	-0.003426	cg20641465	-0.004536	cg06511389	-0.01168	ch.X.57019131F	-0.006072	cg08505560	-0.007053	cg03364683	-0.008151	cg25456477	-0.00459	cg00035000	-0.005844
cg11382477	-0.002022	cg22112051	-0.002994	cg22863920	-0.0006711	cg12717594	-0.005432	cg00680551	-0.001483	cg23032936	-0.002684	cg16146033	-0.009469	cg10406027	-0.003406	ch.X.714485F	-0.004523	cg07382923	-0.01168	cg26394940	-0.006064	cg25456477	-0.00705	cg06688910	-0.00815	cg09655782	-0.004587	cg05038216	-0.005827
cg20123891	-0.002017	cg10239098	-0.002979	cg05327835	-0.0006703	cg22517836	-0.005387	cg04770088	-0.001481	cg17104258	-0.002683	cg11026555	-0.009467	cg02656741	-0.003405	cg17491987	-0.004517	cg14206898	-0.01167	cg15394142	-0.006054	cg16173191	-0.007043	cg08787401	-0.00813	cg08122140	-0.004585	cg18759693	-0.00581
cg08441931	-0.002005	cg13498289	-0.002956	cg12036735	-0.0006666	cg25890168	-0.005386	cg13071476	-0.001481	cg26827987	-0.002677	cg01899130	-0.0094	cg14714537	-0.003373	cg15177071	-0.004481	cg08331313	-0.01166	cg21064080	-0.006021	cg16489610	-0.007034	cg14710552	-0.008122	cg18801599	-0.004582	cg07905444	-0.005795
cg18094907	-0.002005	cg00506629	-0.002951	cg00680551	-0.0006652	cg25110126	-0.005378	cg14093715	-0.001479	cg07216425	-0.002672	cg19828516	-0.009378	cg09978533	-0.003371	cg22114489	-0.004475	cg04770088	-0.01165	cg26916780	-0.005978	ch.X.108297408F	-0.007026	cg27624424	-0.008118	cg02097309	-0.004566	cg02567488	-0.005786
cg19672993	-0.002004	cg25439632	-0.002949	cg10099799	-0.0006641	cg01342196	-0.005364	cg26085804	-0.001476	cg16335762	-0.00266	cg06419432	-0.009377	cg25016544	-0.003351	cg00268086	-0.00447	cg24567694	-0.01162	cg16851771	-0.005969	cg02481642	-0.00701	cg11084266	-0.008109	cg23922454	-0.004566	cg21597595	-0.005758
cg09012544	-0.002002	cg09029902	-0.002943	cg26607828	-0.000664	cg22782986	-0.005343	cg11026555	-0.001475	cg17586256	-0.00266	cg12530994	-0.009374	cg23786580	-0.003344	cg00662647	-0.004455	cg17415265	-0.0116	cg09809276	-0.005967	cg04066019	-0.006966	cg17572800	-0.008098	cg08218061	-0.004564	cg02017450	-0.005746
cg09486861	-0.002002	cg12319602	-0.002937	cg06998282	-0.0006632	cg12530994	-0.005329	cg25439632	-0.001473	cg06913958	-0.002649	cg05318142	-0.009352	cg25287071	-0.003342	cg27255678	-0.004447	ch.X.108297408F	-0.01156	cg16721977	-0.005966	cg12439977	-0.006956	cg26916780	-0.008086	cg08811314	-0.004554	cg01422262	-0.005745
cg11081723	-0.001998	cg16653495	-0.002928	cg05419671	-0.000663	cg10129408	-0.005319	cg02387679	-0.001472	cg00035000	-0.002647	cg27326452	-0.009343	cg09467501	-0.003328	cg06361405	-0.004433	cg14841337	-0.01155	cg26653360	-0.00596	cg12920938	-0.006952	cg17415265	-0.008084	cg17572800	-0.004549	cg26906217	-0.005709
cg08886651	-0.001993	cg05974816	-0.002927	cg02535219	-0.0006626	cg02825373	-0.005313	cg14597534	-0.001472	cg05318142	-0.002643	cg00325866	-0.00934	cg09693106	-0.00332	cg09978533	-0.004426	cg00343092	-0.01154	cg15203735	-0.005958	cg25859998	-0.006942	cg12169977	-0.00805	cg00035000	-0.004547	cg09285095	-0.005682
cg16624272	-0.001986	cg08886651	-0.002927	cg01244650	-0.0006591	cg12513505	-0.00531	cg14119437	-0.001464	cg06419432	-0.002635	cg04812509	-0.009271	cg16223546	-0.003286	cg16223546	-0.004401	cg13250001	-0.01145	cg00035000	-0.005949	cg19789466	-0.006897	cg10685559	-0.008045	cg27118059	-0.004543	cg09367425	-0.005681
cg00662647	-0.001985	cg00450784	-0.002911	cg23244022	-0.0006578	cg03657573	-0.005308	cg16855845	-0.001462	cg25016544	-0.002624	cg10406027	-0.009239	cg26493353	-0.003284	cg26796190	-0.004395	cg12691534	-0.01144	cg19924948	-0.005938	cg01094748	-0.006883	cg04846710	-0.008041	cg05608844	-0.004539	ch.X.1282647F	-0.005681
cg22863920	-0.001984	cg03508786	-0.002909	cg23907053	-0.0006562	cg02435495	-0.005307	cg22122410	-0.001461	cg10935762	-0.002603	cg27140247	-0.009208	cg21359747	-0.003274	cg23928165	-0.004392	cg14284211	-0.0114	cg25442239	-0.005938	cg04464940	-0.006876	cg02506867	-0.007995	cg02466588	-0.004537	cg11696475	-0.005671
cg14166485	-0.001982	cg01533108	-0.002907	cg23922454	-0.0006558	cg05694021	-0.0053	cg14206898	-0.001458	cg13600477	-0.002599	cg25456477	-0.009195	cg01312858	-0.00326	cg10695848	-0.00438	cg19584803	-0.01138	cg08230658	-0.005912	cg16851771	-0.00686	cg13797825	-0.007992	cg18664369	-0.004524	cg15446845	-0.00567
cg00255142	-0.001976	cg02535219	-0.002906	cg20117153	-0.0006557	cg10673740	-0.005281	cg19672993	-0.001458	cg00765922	-0.00259	cg06511389	-0.009179	cg12530994	-0.00325	cg07463059	-0.004374	cg25957967	-0.01137	cg02998620	-0.005911	cg22783363	-0.006858	cg21573047	-0.007983	cg12530994	-0.004519	cg11026555	-0.005669
cg03657573	-0.001966	cg23432345	-0.002903	cg03854765	-0.0006556	cg04576672	-0.005256	cg25016544	-0.00145	cg17163527	-0.00259	cg00035000	-0.00916	cg21577472	-0.003248	cg07859439	-0.004366	cg09978533	-0.01136	cg05670953	-0.00591	cg03065202	-0.006853	cg07905444	-0.007979	cg13510327	-0.004517	cg19753794	-0.005662
cg05951576	-0.001964	cg13986130	-0.002902	cg15369821	-0.0006542	cg12478384	-0.005253	cg15369821	-0.001449	cg08284213	-0.002587	cg08662757	-0.009157	cg21151432	-0.003247	cg02632185	-0.004353	cg15013019	-0.01136	cg18531146	-0.0059	cg21865533	-0.006842	cg13355041	-0.00794	cg22832061	-0.004513	cg05999245	-0.005649
cg10713589	-0.001962	cg22289831	-0.002897	cg05026135	-0.0006535	cg07941983	-0.005226	cg21263122	-0.001449	cg02119927	-0.002574	cg04109822	-0.009155	cg23725454	-0.003243	cg26216433	-0.00435	cg07905444	-0.01135	cg19584803	-0.005891	cg00448761	-0.00684	cg09980622	-0.007934	cg04118888	-0.004489	cg07643912	-0.005631
cg21251125	-0.001958	cg13796823	-0.002892	cg25626427	-0.00065	cg07654569	-0.005224	cg03001832	-0.001447	cg14344261	-0.002574	cg25524962	-0.009155	cg23907053	-0.003226	cg00448761	-0.004345	cg08811314	-0.01134	cg15369821	-0.005856	cg14219290	-0.006825	cg11857997	-0.007851	cg01901107	-0.004488	cg03324578	-0.005621
cg02417084	-0.001949	cg01244650	-0.002891	cg09420439	-0.0006497	cg15925940	-0.005222	cg25890168	-0.001442	cg10905180	-0.002573	cg14515996	-0.009145	cg27140247	-0.003217	cg00279790	-0.00434	cg15394142	-0.01133	cg15375239	-0.005855	cg04845871	-0.006819	cg14206898	-0.007844	cg20495404	-0.004486	cg20117153	-0.005617
cg27279991	-0.001949	cg12036735	-0.00289	cg03324578	-0.0006478	cg19783626	-0.005202	cg05318142	-0.001441	cg02481642	-0.002567	cg08551615	-0.009137	cg01434608	-0.003207	cg17956079	-0.004331	cg18880897	-0.01133	cg07905444	-0.005809	ch.X.97651759F	-0.006818	cg09408116	-0.007776	cg18945842	-0.004483	cg19737037	-0.005581
cg08010362	-0.001948	cg25110126	-0.00289	cg07905444	-0.000646	cg22956254	-0.005199	cg01461199	-0.001437	cg02017450	-0.002564	cg01909921	-0.009135	cg14305711	-0.003199	cg13847066	-0.004324	cg25183082	-0.01131	cg11215918	-0.00579	cg17432453	-0.006817	cg03245734	-0.007729	cg14579997	-0.00447	cg12840248	-0.005578
cg05148373	-0.001947	cg03834031	-0.002865	cg19515245	-0.0006441	cg06688910	-0.005198	cg21701395	-0.001434	cg21235151	-0.002564	cg10695848	-0.00911	cg04138112	-0.003196	cg06945936	-0.004316	ch.X.23343928R	-0.01129	cg17661462	-0.005773	cg27499820	-0.006797	cg17491987	-0.007723	cg11225410	-0.004465	cg12634932	-0.005575
cg23032936	-0.001947	cg02481642	-0.002864	cg24085895	-0.0006435	cg10241671	-0.005194	cg08578245	-0.001432	cg05110391	-0.002554	cg04525491	-0.009087	cg05645404	-0.003185	cg05643592	-0.004313	cg17215036	-0.01128	cg14206898	-0.005765	cg11183136	-0.006783	cg26906217	-0.007673	cg08578023	-0.004452	cg14426428	-0.005572
cg27116819	-0.001947	cg16958524	-0.002864	cg13683218	-0.0006427	cg10942903	-0.005193	cg16561266	-0.001432	cg11203397	-0.002551	cg25110126	-0.009075	cg20392842	-0.003185	cg09693106	-0.004305	cg21603914	-0.01128	cg22104578	-0.005764	cg24035962	-0.006774	cg14579997	-0.007667	cg12577010	-0.004425	cg10148280	-0.005571
cg15203735	-0.001946	cg18233746	-0.002864	cg23833896	-0.0006425	cg22104578	-0.005193	cg12800244	-0.00143	cg15778012	-0.002551	cg13250001	-0.009067	cg25439632	-0.003171	cg06679694	-0.004296	cg05951576	-0.01125	cg25957967	-0.005738	cg03712758	-0.006767	cg08727535	-0.007626	cg17795789	-0.004423	cg25491558	-0.00557
cg05645404	-0.001943	cg17104258	-0.002851	cg16666964	-0.0006412	cg09261020	-0.005181	cg26760589	-0.001413	cg09012544	-0.00255	cg16489610	-0.009047	cg23201812	-0.003169	cg20048434	-0.00429	cg20641465	-0.01124	cg05867154	-0.005719	cg04829853	-0.006756	cg13453904	-0.007625	cg14710552	-0.004418	cg10508639	-0.005567
cg14919554	-0.001939	cg13475583	-0.002847	cg10293422	-0.0006395	cg21032292	-0.00518	cg12256688	-0.001408	cg18479593	-0.002536	cg26426447	-0.009024	ch.X.2195099F	-0.003166	cg00483562	-0.004272	cg02656741	-0.01122	cg07201215	-0.005719	cg20544372	-0.006694	cg26201952	-0.007618	cg11026555	-0.004416	cg18475643	-0.005561
cg06913958	-0.001935	cg09654247	-0.002843	cg02408775	-0.0006349	cg11755107	-0.005163	cg08079596	-0.001407	cg17820591	-0.002531	cg02298094	-0.009006	cg00218447	-0.003162	cg04689061	-0.004264	cg16851771	-0.01122	cg00577865	-0.005714	cg04204967	-0.006693	cg02097309	-0.00759	cg13767001	-0.004409	cg02825373	-0.005555
cg21968580	-0.00193	cg07582157	-0.002829	cg09258479	-0.0006343	cg11018337	-0.005127	cg22790973	-0.001407	cg12134570	-0.002514	cg04066019	-0.009001	cg05694021	-0.00316	cg17342973	-0.004261	cg20943039	-0.01121	cg23661183	-0.005709	cg26760589	-0.006687	cg00262446	-0.007586	cg21697198	-0.004403	cg12478384	-0.005551
cg12590051	-0.001928	cg19871940	-0.002823	cg17130457	-0.0006341	cg03315007	-0.005126	cg02417084	-0.001405	ch.X.1667329F	-0.002514	cg01080924	-0.00899	cg06197769	-0.003159	cg17104258	-0.00426	cg18094824	-0.01119	cg24531915	-0.005699	cg19422030	-0.006677	cg16789592	-0.00758	cg13250001	-0.004398	cg09166091	-0.005548
cg17067190	-0.001928	cg18855674	-0.002822	cg23928165	-0.0006337	cg06297470	-0.005106	cg23928165	-0.001403	cg09978533	-0.002511	cg12462705	-0.008984	cg13600477	-0.003159	cg24610274	-0.004259	cg25439632	-0.01119	ch.X.2058079F	-0.005696	cg23683528	-0.006676	cg03315007	-0.007556	cg24633771	-0.004397	cg06419432	-0.005544
cg13422850	-0.001927	cg00397479	-0.002818	cg02716635	-0.0006321	cg09278098	-0.005098	cg10536999	-0.001398	cg09476611	-0.002497	cg23907053	-0.00898	cg10543450	-0.003157	cg27140247	-0.004235	cg07443287	-0.01117	cg12691534	-0.005691	cg27140247	-0.006671	cg01342196	-0.007552	cg15757271	-0.004396	cg18094824	-0.005543
cg19523213	-0.001926	cg17996329	-0.002814	cg10695848	-0.0006307	cg09269620	-0.00509	cg14515996	-0.001397	ch.X.714485F	-0.002495	cg03245734	-0.008976	cg16173191	-0.003156	cg13250001	-0.004231	cg03065202	-0.01115	cg20495404	-0.005691	cg14156441	-0.006663	cg11203397	-0.007538	cg21597595	-0.004395	cg24106636	-0.005534
cg07336230	-0.001925	cg11983576	-0.002811	cg09278098	-0.0006302	cg10099799	-0.005073	cg26216433	-0.001396	cg25609393	-0.002482	cg21646955	-0.008884	cg26916780	-0.003154	cg05423393	-0.004222	cg06679694	-0.01112	cg06321883	-0.005675	cg25125453	-0.006656	cg25456477	-0.007536	cg24059154	-0.004389	cg16547579	-0.005527
cg15394142	-0.001924	cg11878331	-0.00281	cg25439632	-0.0006301	cg14131272	-0.005058	cg01342196	-0.001393	cg06508783	-0.002481	cg07110659	-0.008859	cg24361291	-0.003151	cg24035962	-0.004208	ch.X.2195099F	-0.01112	cg18094824	-0.00567	ch.X.112118442F	-0.006653	cg24567694	-0.00753	cg08578245	-0.004382	cg13836518	-0.005525
cg10129408	-0.001923	cg00578252	-0.002808	cg11755107	-0.0006294	cg23045908	-0.005055	cg23595222	-0.001389	cg26796190	-0.00248	cg17601658	-0.00885	cg13250001	-0.003148	cg26916780	-0.004203	cg13299776	-0.01111	cg18664369	-0.005667	cg06822689	-0.006652	cg18748525	-0.007527	cg12555646	-0.004377	cg23201812	-0.005525
cg01244650	-0.00192	cg09853371	-0.002804	cg08010362	-0.000626	cg23833896	-0.005043	cg22415969	-0.001387	cg01434608	-0.002479	cg09258479	-0.008848	cg19337852	-0.003141	cg19826026	-0.004191	cg10585371	-0.01107	cg05449136	-0.005649	cg02964396	-0.006641	cg16851771	-0.007522	cg04964062	-0.004371	cg00488512	-0.005511
cg18456803	-0.001918	cg24902920	-0.002804	cg12436196	-0.0006257	cg13510327	-0.005038	cg22753340	-0.001384	ch.X.112118442F	-0.002474	cg18664369	-0.008843	cg17688837	-0.003137	cg08331313	-0.004183	cg00035000	-0.01099	cg08872722	-0.005646	cg22017733	-0.006615	cg26835302	-0.007513	cg08604594	-0.004357	cg17507671	-0.005496
cg09285095	-0.001913	cg04812509	-0.002803	cg16958524	-0.0006254	cg25524962	-0.005035	cg00448761	-0.001382	cg21865533	-0.002468	cg19241689	-0.008833	cg15177071	-0.003135	cg06162038	-0.004178	cg13767001	-0.01098	cg20918957	-0.005622	cg02017450	-0.006591	cg07174665	-0.00751	cg24315421	-0.004348	cg19216198	-0.005496
cg02855924	-0.001905	cg18094907	-0.002794	cg06861572	-0.0006237	cg07211381	-0.005018	cg08441931	-0.001382	ch.X.703923F	-0.002463	cg11342670	-0.008827	cg27315170	-0.00313	cg17214502	-0.00417	cg14579997	-0.01098	cg07211894	-0.005599	cg26216433	-0.006586	cg14714537	-0.007509	cg14426428	-0.004346	cg02396676	-0.005494
cg04525491	-0.0019	cg23535596	-0.002794	cg23595222	-0.000623	cg12259256	-0.005018	cg08573893	-0.00138	cg06230736	-0.002462	cg23201812	-0.008825	cg01080924	-0.003128	cg12713583	-0.004159	cg18258224	-0.01098	cg06731639	-0.005587	cg02788637	-0.006585	cg21402832	-0.007509	cg24567694	-0.004341	cg16427096	-0.005494
cg05443922	-0.0019	cg02245794	-0.002788	cg04693928	-0.0006225	cg24529484	-0.005015	cg18073151	-0.001379	cg08079596	-0.002452	cg15203735	-0.008823	cg16761581	-0.003123	cg12224508	-0.004153	ch.X.938089F	-0.01096	cg23976499	-0.005581	cg24098643	-0.006561	cg02656741	-0.007508	cg03315007	-0.004338	cg00241638	-0.005474
cg05893300	-0.0019	cg05318142	-0.002786	cg20943039	-0.0006223	cg07688416	-0.005011	cg08122140	-0.001366	cg05148373	-0.002451	cg10543450	-0.0088	cg26487948	-0.003121	cg01899130	-0.004133	cg09680447	-0.01094	cg14284211	-0.005578	cg12577010	-0.00655	cg11183136	-0.007501	cg10253929	-0.004326	cg22230538	-0.005466
cg03287340	-0.001899	cg03979206	-0.002783	cg24845848	-0.0006209	cg11862959	-0.005002	cg00145177	-0.001365	cg01909921	-0.002447	cg24610274	-0.008783	cg15996480	-0.00312	cg08321576	-0.004129	ch.X.57019131F	-0.01092	cg21913319	-0.00557	cg26686147	-0.00655	ch.X.382657R	-0.007489	cg07941983	-0.004318	cg18891127	-0.005454
cg26607828	-0.001898	cg06927775	-0.002778	cg01000615	-0.0006203	cg17837526	-0.004989	cg02481642	-0.001364	cg03910065	-0.002446	cg00662647	-0.008781	cg21900495	-0.003113	cg05437446	-0.004128	cg08321576	-0.01091	cg20570410	-0.005569	ch.X.1023208F	-0.006536	cg00785738	-0.007487	cg16356456	-0.004314	cg10838664	-0.005442
cg15944684	-0.001897	cg12206423	-0.002776	cg12462705	-0.0006193	cg09956907	-0.004983	cg23009123	-0.001363	cg08811314	-0.002438	cg21359747	-0.008765	cg16335762	-0.003111	cg15203735	-0.004127	cg24228112	-0.01091	cg01909921	-0.005556	cg03333590	-0.006531	cg11594940	-0.007451	cg24504954	-0.004312	cg18801599	-0.005442
cg18363192	-0.001892	cg26685941	-0.002774	cg09029902	-0.0006182	cg14539393	-0.004978	cg04525491	-0.001362	cg10239098	-0.002436	cg06621373	-0.008742	cg13767001	-0.003105	cg10925082	-0.004126	cg00498591	-0.0109	cg07463059	-0.005554	cg19584803	-0.006526	cg17795789	-0.007448	cg09628838	-0.00431	ch.X.714485F	-0.005437
cg18202336	-0.001889	cg10129408	-0.002772	cg10713589	-0.0006175	cg06927775	-0.004969	cg14305711	-0.001361	cg03834031	-0.002435	cg09845785	-0.008728	cg16958524	-0.003105	cg09591072	-0.004121	cg04109822	-0.01088	cg06822689	-0.005546	cg21032292	-0.006519	cg23833896	-0.007444	cg12622139	-0.004308	cg20392842	-0.005435
cg16978914	-0.001885	cg23928165	-0.002768	cg12845520	-0.0006174	cg24845848	-0.004968	cg00450784	-0.001357	ch.X.92448175R	-0.002434	cg04464940	-0.008724	cg26201952	-0.003103	cg26201952	-0.004121	cg04636841	-0.01082	cg16489610	-0.005542	cg06998282	-0.006509	cg01909921	-0.007442	cg17174775	-0.004306	cg06511389	-0.005431
cg16653495	-0.001878	cg01597480	-0.002759	cg01080924	-0.0006155	cg20979233	-0.00496	cg13498289	-0.001356	cg18441811	-0.002433	cg22114489	-0.008709	cg00327697	-0.003093	cg13767001	-0.004116	cg08999915	-0.0108	cg17837526	-0.00552	cg09285095	-0.006509	cg13414478	-0.007439	cg20869844	-0.004306	cg16681130	-0.00543
cg08774207	-0.001874	cg17215036	-0.002754	cg22112051	-0.0006155	cg05327835	-0.004956	cg26406907	-0.001356	cg11857997	-0.002431	cg01422262	-0.008697	cg08551615	-0.003089	cg02964396	-0.004113	cg01434608	-0.01076	cg27499820	-0.005519	cg10985914	-0.006509	cg04619627	-0.007416	cg04598300	-0.004302	cg24567694	-0.005428
cg09297288	-0.001873	cg06254440	-0.00275	cg21235151	-0.0006149	cg25637836	-0.004956	cg09467501	-0.001352	cg16561266	-0.002424	cg17130457	-0.008693	cg01120165	-0.003086	cg05825559	-0.004109	cg06981182	-0.01075	cg03012821	-0.005517	cg26022183	-0.006509	cg08999915	-0.007403	cg06652329	-0.004302	cg01597480	-0.005422
cg14515996	-0.001869	cg10713589	-0.002743	cg26127778	-0.0006142	cg13272159	-0.004955	cg16223546	-0.001352	ch.X.938089F	-0.002422	cg11387340	-0.00869	cg03741862	-0.003079	cg23595222	-0.004096	cg02506867	-0.01071	cg09166091	-0.005513	cg16146033	-0.006506	cg07046575	-0.007401	cg03065202	-0.004301	cg21395152	-0.005419
cg03476007	-0.001867	cg06118999	-0.002739	cg21266502	-0.0006133	cg17058475	-0.004949	cg20801464	-0.001351	cg04228935	-0.002421	cg01031400	-0.008684	cg13453904	-0.003071	cg19657603	-0.004085	cg06652329	-0.01069	cg00446414	-0.005511	cg09693106	-0.006501	cg08317263	-0.007378	cg24935042	-0.004294	cg12713583	-0.005411
cg18396832	-0.001867	cg06166242	-0.002734	cg04313875	-0.0006127	cg15394142	-0.004943	cg15177071	-0.00135	cg17468773	-0.002414	cg15375239	-0.008656	cg17586256	-0.00307	cg23347429	-0.004084	cg12855166	-0.01069	cg11291081	-0.005511	cg00268086	-0.006499	cg27234864	-0.007367	cg09978533	-0.004275	cg03364683	-0.005409
cg03076855	-0.001864	cg09258479	-0.002734	cg26744375	-0.0006114	cg27624424	-0.004941	cg09556952	-0.001349	cg13498289	-0.002412	cg21869956	-0.008641	cg06162038	-0.003065	cg02680341	-0.004078	cg15387132	-0.01069	cg07139440	-0.005502	cg12224508	-0.006488	cg09177567	-0.007362	cg07431286	-0.004274	cg22017733	-0.005405
cg03306024	-0.001857	cg15369821	-0.002734	cg16291657	-0.0006108	cg03065202	-0.004935	cg15626828	-0.001347	cg05810170	-0.00241	cg26127778	-0.008636	cg03245734	-0.003061	cg02408775	-0.004053	cg17184704	-0.01069	cg02115911	-0.0055	cg22114489	-0.006457	cg13914324	-0.007359	cg11084266	-0.00427	cg25796439	-0.005397
cg24577193	-0.001857	cg19515245	-0.002725	cg11983576	-0.0006096	cg16173191	-0.004931	cg21395152	-0.001346	cg10576725	-0.002401	cg19515245	-0.008603	cg02619205	-0.003056	cg06419432	-0.004053	cg12439977	-0.01065	cg04845871	-0.005489	cg22444720	-0.006439	cg08230658	-0.007347	cg19112895	-0.00427	ch.X.68408155R	-0.005396
cg03641748	-0.001854	cg26762347	-0.002717	cg09467501	-0.0006092	cg15079315	-0.004927	cg15718833	-0.001342	cg21011133	-0.002399	cg00765922	-0.008578	cg00662647	-0.003048	cg04852443	-0.00404	cg06162038	-0.01064	cg19935945	-0.005486	cg19051416	-0.006411	cg04770088	-0.007327	cg14206898	-0.004269	cg15757271	-0.005395
cg22256631	-0.001852	cg11082691	-0.002716	cg01031400	-0.0006075	cg06081609	-0.004926	cg21577472	-0.001342	cg05038216	-0.002396	cg19924948	-0.008576	cg03065202	-0.003038	cg05191175	-0.004039	cg02298094	-0.01056	cg13797825	-0.005481	cg21402832	-0.006399	cg26022183	-0.007307	cg02380334	-0.004255	cg01080924	-0.005378
cg08604594	-0.001847	cg15462501	-0.002716	cg08035234	-0.0006071	cg26295921	-0.004926	cg16173191	-0.001341	cg26685941	-0.002391	cg26201952	-0.008535	cg17130457	-0.003036	cg26493353	-0.004032	cg08424184	-0.01056	cg03834031	-0.005477	cg12526298	-0.006396	cg17468773	-0.007274	cg27624424	-0.00425	cg21715963	-0.005376
cg05974816	-0.001843	cg23786580	-0.002714	cg00035000	-0.000607	cg16291657	-0.004923	cg03641748	-0.00134	cg26762347	-0.002389	cg00412337	-0.008508	cg01342196	-0.003032	cg00971050	-0.004028	cg16173191	-0.01056	cg08578245	-0.005474	cg00241638	-0.006393	cg14119437	-0.007249	cg22444720	-0.004249	ch.X.1031144F	-0.005362
cg06508783	-0.00184	cg08079596	-0.002708	cg02435495	-0.0006065	cg22017726	-0.004907	cg14376467	-0.001338	cg03001832	-0.002385	cg09763162	-0.008506	cg19241689	-0.003032	cg19520927	-0.004025	ch.X.1023208F	-0.0105	cg10896862	-0.005469	cg20495404	-0.00637	cg14609729	-0.007246	cg06422883	-0.004245	cg20560075	-0.005351
cg03143164	-0.001838	cg11018337	-0.002705	cg07382943	-0.0006064	cg22885965	-0.004896	cg14547067	-0.001338	cg00500522	-0.002378	cg12613618	-0.008492	cg17163527	-0.003026	cg17001566	-0.004024	cg02567488	-0.01049	cg06197769	-0.005463	cg05460582	-0.006363	cg10987597	-0.007224	cg16681130	-0.004243	cg16789592	-0.005325
cg18187680	-0.001838	cg10576725	-0.002702	cg16173191	-0.0006047	cg23269169	-0.004876	cg09415272	-0.001336	ch.X.111648924R	-0.002378	cg12713583	-0.008491	cg06118999	-0.003025	cg10165071	-0.004021	cg18179075	-0.01049	cg25439632	-0.005462	cg06162038	-0.006351	cg21597595	-0.007221	cg04301104	-0.004241	cg10080155	-0.005321
cg01000615	-0.001834	cg11026555	-0.002698	cg14166485	-0.0006029	cg06185924	-0.004875	cg12462705	-0.001336	cg13483603	-0.002376	cg24631482	-0.008487	cg11831003	-0.003025	cg15665400	-0.004018	cg18352516	-0.01049	cg11225410	-0.005448	cg06907405	-0.006348	cg07392085	-0.007219	cg24531915	-0.004236	cg08154437	-0.005318
cg13071476	-0.001834	cg07028533	-0.002695	cg01597480	-0.0006026	cg11150901	-0.004873	cg26685941	-0.001335	cg13475583	-0.002374	cg14155397	-0.008482	cg26835302	-0.003024	cg03476007	-0.004009	cg20048434	-0.01049	cg12996903	-0.005427	cg01080924	-0.006346	cg04109822	-0.007213	cg05015635	-0.004227	cg04064583	-0.005307
cg16146033	-0.001833	cg18781240	-0.002689	cg00574958	-0.0006023	cg11026555	-0.00487	cg04509074	-0.001334	cg17837526	-0.002373	cg02097309	-0.008464	cg26657240	-0.003017	cg00262446	-0.004008	cg24097797	-0.01049	cg16653495	-0.005427	cg27188703	-0.006332	cg24333845	-0.007206	cg17521583	-0.004225	cg15833534	-0.005293
cg00973286	-0.001832	cg23089549	-0.002688	cg25541958	-0.0006011	cg25957967	-0.004864	cg24081819	-0.001332	cg02971546	-0.002371	cg05418487	-0.008447	cg10842095	-0.003013	cg15996480	-0.004	cg27563952	-0.01047	cg00738869	-0.005426	cg09980622	-0.006314	cg02207200	-0.007201	cg08321576	-0.004215	cg18945842	-0.005287
cg04118888	-0.001832	cg24085895	-0.002687	cg01005968	-0.000599	cg07751641	-0.004861	cg16958524	-0.00133	cg10890829	-0.002371	cg16855845	-0.008442	cg08079596	-0.003008	cg10842095	-0.003999	cg27086308	-0.01045	cg12373208	-0.005425	cg12093371	-0.00631	cg06713116	-0.007185	cg07174665	-0.004212	cg25456477	-0.005282
cg15744359	-0.001829	cg12034943	-0.002686	cg23089549	-0.0005989	cg14597534	-0.004858	cg26916780	-0.00133	cg01597480	-0.002367	cg08230658	-0.008432	cg12361223	-0.003008	cg22958957	-0.003995	cg01909921	-0.01044	cg00218447	-0.005419	cg18664369	-0.006293	cg14417954	-0.007179	cg02825373	-0.004208	cg05922563	-0.005271
cg04982951	-0.001824	cg18187680	-0.002686	cg04636841	-0.0005985	cg02750234	-0.004854	cg07190763	-0.001329	cg26493353	-0.002365	cg04916091	-0.008424	cg06029700	-0.002999	cg12390895	-0.003989	cg26493353	-0.01043	cg04619627	-0.005417	cg24203709	-0.006286	cg12238593	-0.00717	cg11150901	-0.004206	cg12706425	-0.005259
cg26216433	-0.001821	cg14732324	-0.002682	cg04118888	-0.0005974	cg13916740	-0.004853	cg16335762	-0.001329	cg12848345	-0.002342	cg10851739	-0.008415	cg16356456	-0.002998	cg03694261	-0.003988	cg11019430	-0.01042	cg25859998	-0.005412	cg20560075	-0.006273	cg00488512	-0.007162	cg13071476	-0.004206	cg09278098	-0.005252
cg05406868	-0.00182	cg24770596	-0.002679	cg05573381	-0.0005974	cg09689449	-0.004845	cg09896120	-0.001328	cg08662757	-0.002335	cg26835302	-0.008393	cg19634213	-0.002988	cg18881873	-0.003988	cg14085017	-0.01042	cg04576568	-0.005408	cg11019430	-0.00627	cg03834031	-0.007147	cg04894169	-0.004202	cg10638599	-0.005252
cg23220551	-0.001816	cg10293422	-0.002677	cg02413850	-0.0005964	cg20691722	-0.004845	cg12293340	-0.001328	cg21151432	-0.002333	cg08491125	-0.008383	cg26127778	-0.00298	cg25183082	-0.003984	cg14830371	-0.01042	cg14182566	-0.0054	ch.X.2195099F	-0.006265	cg07254821	-0.007146	cg04109822	-0.004188	cg12427321	-0.005248
cg17586256	-0.001814	cg11672037	-0.002674	cg06413398	-0.0005964	cg26189983	-0.004837	cg04710402	-0.001327	cg23201812	-0.002332	cg12384572	-0.00837	cg23708763	-0.002974	cg00117172	-0.003983	cg02788637	-0.01041	cg14841337	-0.005396	cg17415265	-0.006261	cg05103387	-0.007142	cg26022183	-0.004187	cg26027170	-0.005246
cg08971667	-0.001812	cg15056288	-0.00267	cg12513505	-0.0005964	cg22409276	-0.00483	cg17837526	-0.001326	cg23671997	-0.002331	cg09355771	-0.008358	cg01899130	-0.00297	cg03657573	-0.003968	cg23057706	-0.01041	cg12224508	-0.005393	cg14660125	-0.006257	cg14859854	-0.007141	cg05419671	-0.004173	cg17353698	-0.005243
cg04710402	-0.00181	cg03935432	-0.002669	cg04588165	-0.0005957	cg24685998	-0.004815	cg04118888	-0.001325	cg16653495	-0.002327	cg18204158	-0.008358	cg25442239	-0.00297	cg13247581	-0.003947	cg25016544	-0.01041	cg03245734	-0.005388	ch.X.2058079F	-0.006246	cg06741198	-0.007139	cg17837526	-0.004167	cg03060555	-0.005231
cg09930017	-0.00181	cg05694021	-0.002668	cg00403955	-0.0005951	cg01312858	-0.00481	cg16585827	-0.001324	cg00940502	-0.002321	cg01109135	-0.008355	cg06981182	-0.002964	cg07434780	-0.003945	cg25287257	-0.01041	cg07067241	-0.005385	cg07200280	-0.006241	cg06060137	-0.007138	cg23954922	-0.004161	cg10932907	-0.005229
cg25890168	-0.001809	cg21992238	-0.002668	cg16938490	-0.0005946	cg17820591	-0.004798	cg15563450	-0.001323	cg00275449	-0.002319	cg11084266	-0.008351	cg11731221	-0.002963	cg12206423	-0.003945	cg08122140	-0.0104	cg26796190	-0.00538	cg24228112	-0.006232	cg23595222	-0.007137	cg17080504	-0.004154	cg01196712	-0.005215
cg26657240	-0.001809	cg00838150	-0.002667	cg12034943	-0.0005931	cg08640609	-0.004797	cg12848345	-0.001319	cg17543123	-0.002316	cg16761581	-0.008336	cg11983576	-0.002955	cg17163527	-0.00394	cg11183136	-0.0104	cg11019430	-0.00537	cg05573381	-0.006225	cg05908079	-0.00713	cg02750234	-0.004146	cg08218061	-0.005214
cg24770596	-0.001808	cg13289884	-0.002667	cg11203397	-0.0005928	cg18415585	-0.004785	cg15203735	-0.001318	ch.X.256253R	-0.002316	cg15177071	-0.008324	cg01000615	-0.002946	cg20917083	-0.003938	cg00785738	-0.01039	cg06107816	-0.005369	cg23833896	-0.006225	cg27429749	-0.00713	cg19216198	-0.00414	cg19789466	-0.005214
cg03508786	-0.001804	cg16199277	-0.002663	cg00241638	-0.0005922	cg03508786	-0.004779	cg07067241	-0.001314	cg19753794	-0.002311	cg23691090	-0.00831	cg02012576	-0.002946	cg05418487	-0.003921	cg12169977	-0.01037	cg25408314	-0.005367	cg06366981	-0.006211	cg17381565	-0.007117	cg14376467	-0.004136	cg14206898	-0.005206
cg26835302	-0.001804	cg15668468	-0.002662	cg03065202	-0.0005918	cg27279991	-0.004777	cg02741554	-0.001311	cg26069719	-0.002309	cg24101049	-0.008304	cg02632185	-0.002942	cg18486102	-0.003919	cg05437446	-0.01036	cg12920938	-0.005361	cg13008978	-0.006205	cg20138458	-0.007116	cg02632185	-0.004133	cg22104578	-0.005204
cg12530994	-0.001798	cg23907053	-0.002662	cg05694021	-0.0005916	cg17468773	-0.004776	cg16371864	-0.00131	cg05103387	-0.002308	cg06204948	-0.008298	cg00049440	-0.002941	cg03712758	-0.003917	cg09285095	-0.01034	cg22049858	-0.00536	cg04160501	-0.006187	cg27138204	-0.007116	cg26487031	-0.004121	cg13071476	-0.005196
cg15462501	-0.001797	cg06945936	-0.002661	cg24139898	-0.0005896	cg21865533	-0.004774	cg06162038	-0.001303	cg21158502	-0.002308	cg05038216	-0.008275	cg05573381	-0.002935	cg12134570	-0.003916	cg19157329	-0.01034	cg00662647	-0.005357	cg03245734	-0.006184	cg17287553	-0.007115	cg08727535	-0.004111	cg10091994	-0.005188
cg11549953	-0.001793	cg12590051	-0.002658	cg13412498	-0.0005855	cg13537061	-0.004773	cg26672071	-0.0013	cg10948359	-0.002299	cg04845871	-0.008254	cg04228935	-0.002934	cg04138112	-0.003913	cg24035962	-0.01031	cg08811314	-0.00535	cg12713583	-0.006183	cg18439358	-0.007113	cg09669930	-0.00411	cg25125453	-0.00518
cg20383155	-0.001792	cg24191463	-0.002658	cg23533683	-0.0005847	cg00523742	-0.004764	cg24059154	-0.001298	cg04525943	-0.002298	cg25439632	-0.008253	cg05318142	-0.002934	cg09285095	-0.003912	cg12224508	-0.0103	cg04411625	-0.005343	cg23661183	-0.00618	cg18379624	-0.007108	cg04636841	-0.004102	cg20801464	-0.005176
cg20869673	-0.001792	cg27310092	-0.002658	cg21032292	-0.0005842	cg21710324	-0.004762	cg01063813	-0.001297	cg16103712	-0.002297	cg16653495	-0.008249	cg14597534	-0.002931	cg24638647	-0.00391	cg16489610	-0.0103	cg00401091	-0.00532	cg17215036	-0.006172	cg01080924	-0.007105	cg06254440	-0.004083	cg05191175	-0.00517
cg12319602	-0.00179	cg14714537	-0.002657	cg08332594	-0.000584	cg15462501	-0.00476	cg03217795	-0.001297	cg21395152	-0.002292	cg00049440	-0.008242	cg16653495	-0.002929	cg26827987	-0.003904	cg18748525	-0.0103	ch.X.97651759F	-0.005318	cg12158737	-0.006168	cg09978533	-0.007102	cg18399703	-0.004082	cg01775044	-0.005153
cg25179291	-0.001788	cg11342670	-0.002655	cg22104578	-0.0005833	cg24902920	-0.004754	cg15996480	-0.001296	cg23821329	-0.002292	cg27118035	-0.008213	cg07139440	-0.002927	cg27234864	-0.003901	cg07392085	-0.01029	cg07647825	-0.005306	cg17521583	-0.006147	cg22846826	-0.007099	cg08424184	-0.004075	cg25033817	-0.005151
cg10313385	-0.001784	cg24570303	-0.002655	cg21577472	-0.0005813	cg15701237	-0.004747	cg17078980	-0.001296	cg25999578	-0.00229	cg01901107	-0.008187	cg22958957	-0.002924	cg06573604	-0.003898	cg08317263	-0.01029	cg26760589	-0.005302	cg25439632	-0.006141	cg09669930	-0.007089	cg00785738	-0.004069	cg26216433	-0.00515
cg14120215	-0.001782	cg19523213	-0.002653	cg06945936	-0.0005801	cg17768957	-0.004745	cg08811314	-0.001294	cg12384572	-0.002289	cg02535219	-0.008181	cg22827210	-0.002919	cg23252902	-0.003896	cg08588180	-0.01027	cg25287257	-0.005298	cg06662568	-0.006135	cg07941983	-0.007077	cg12224508	-0.004066	cg08110488	-0.005142
cg10406027	-0.00178	cg09278098	-0.002652	cg00707452	-0.0005797	cg10817615	-0.004743	cg13273789	-0.001294	cg17688837	-0.002289	cg23786580	-0.008178	cg02408775	-0.002916	cg24361291	-0.003895	cg14063191	-0.01027	cg15665400	-0.005292	cg15446845	-0.006129	cg09550909	-0.007077	cg13797825	-0.004065	cg06740227	-0.00513
cg25812424	-0.001774	cg21222743	-0.002652	cg05872706	-0.000579	cg12390895	-0.004734	cg27068490	-0.001294	cg25172604	-0.002285	cg21210224	-0.008158	cg04452959	-0.002916	cg15013019	-0.003894	cg10925082	-0.01022	cg04879755	-0.005273	cg25957967	-0.006129	cg24811290	-0.007077	cg04513006	-0.004059	cg18368411	-0.005126
cg24488739	-0.001772	cg08647349	-0.002651	cg09261020	-0.000578	cg04009887	-0.004733	cg01434608	-0.001293	cg15203735	-0.002284	cg26653360	-0.008157	cg11026555	-0.002916	cg10576725	-0.003891	cg21359747	-0.01021	cg21056723	-0.005269	cg21064080	-0.006126	cg21682474	-0.007073	cg06565620	-0.004059	cg13299776	-0.005121
cg23432345	-0.00177	cg16430572	-0.002649	cg13498289	-0.0005762	cg25999578	-0.004731	cg14344261	-0.001292	cg17441401	-0.002284	cg01120165	-0.008127	cg06945936	-0.00291	cg22827210	-0.003883	cg04576568	-0.01018	cg23347429	-0.005269	cg17163527	-0.006125	cg03641748	-0.007065	cg20943039	-0.004051	cg01312858	-0.005104
cg00343092	-0.001769	cg06230736	-0.002647	cg14956327	-0.0005747	cg05999287	-0.004727	cg17163527	-0.001292	cg23261107	-0.002281	cg24797187	-0.00811	cg24393316	-0.00291	cg18483529	-0.003879	cg12462705	-0.01017	cg13836518	-0.005265	cg04619627	-0.006121	cg24374161	-0.007043	cg05443922	-0.004048	cg06162038	-0.005104
cg06303772	-0.001768	cg11187916	-0.002647	cg02958321	-0.0005744	cg14119437	-0.004723	cg18665871	-0.001291	cg09238801	-0.00228	cg23060390	-0.008102	cg01597480	-0.002909	cg03172801	-0.003871	cg14351425	-0.01016	cg05191175	-0.005264	cg17287553	-0.00612	cg02750234	-0.007031	cg11153400	-0.004044	cg09258479	-0.005104
cg06740227	-0.001768	cg24354581	-0.002645	cg07778029	-0.0005742	cg01518631	-0.004722	cg03484533	-0.00129	cg23907053	-0.002279	cg15063322	-0.008101	cg14155397	-0.002909	cg25245082	-0.003866	cg20917083	-0.01016	cg05845319	-0.005263	cg06118384	-0.006106	cg09276998	-0.007028	cg07328888	-0.004043	ch.X.1667329F	-0.005104
cg18241829	-0.001767	cg23609027	-0.00264	cg06204948	-0.0005736	cg06255601	-0.00472	cg18396832	-0.00129	ch.X.1023208F	-0.002279	cg05396731	-0.008093	cg18664369	-0.002904	cg05626764	-0.003865	ch.X.92543860F	-0.01016	cg02331902	-0.005261	cg09899173	-0.006106	cg05608844	-0.007012	cg25522149	-0.004043	cg14539393	-0.005103
cg00680551	-0.001766	cg00091483	-0.002639	cg09654247	-0.0005731	cg24793124	-0.004719	cg22958957	-0.001287	cg23976499	-0.002276	cg09029902	-0.008093	cg15802555	-0.002902	cg17807131	-0.003864	cg18188010	-0.01014	cg20392842	-0.005246	cg15387132	-0.0061	cg12624829	-0.00699	cg16173191	-0.004041	cg04120428	-0.005101
cg05143735	-0.001766	cg14071579	-0.002638	cg14579997	-0.0005726	cg06945936	-0.00471	cg26657240	-0.001283	cg11334818	-0.002265	cg08437570	-0.008091	cg23778363	-0.002901	cg27499820	-0.003864	cg26216433	-0.01014	cg01312858	-0.005245	cg04770088	-0.006091	cg18801599	-0.006983	ch.X.2195099F	-0.004035	cg01546248	-0.005097
cg19536652	-0.001766	cg24700485	-0.002637	cg01202265	-0.0005725	cg14305711	-0.004706	cg20287640	-0.001282	cg12256688	-0.002263	cg19943000	-0.008088	cg18881873	-0.002897	cg06822689	-0.003858	cg22220165	-0.01012	cg17601658	-0.005239	cg00049440	-0.006086	cg24504954	-0.006978	cg18352516	-0.004034	cg04964062	-0.005097
cg03218797	-0.001764	cg05762694	-0.002636	cg24797187	-0.0005706	cg01063813	-0.004703	cg15129307	-0.00128	cg23928165	-0.00226	cg27207881	-0.008062	cg04812509	-0.002896	cg16335762	-0.003858	cg00446414	-0.01011	cg06958537	-0.005235	cg05038216	-0.006086	cg17475456	-0.006969	cg08999915	-0.004032	cg02691192	-0.005072
cg07905444	-0.001762	cg25208017	-0.002627	cg07245225	-0.0005704	cg12555646	-0.004698	cg27216998	-0.001279	cg26505691	-0.00226	cg14830371	-0.008046	cg20048434	-0.002891	cg08430222	-0.003849	cg14305711	-0.01011	cg10342722	-0.005227	cg02298094	-0.006084	cg06419432	-0.006966	cg18531146	-0.004032	ch.X.703923F	-0.005045
cg00369438	-0.001761	cg12436196	-0.002624	cg07336230	-0.0005704	cg01597480	-0.004695	cg13686615	-0.001277	cg18187680	-0.002257	cg26642510	-0.008043	cg26653360	-0.00289	cg08491125	-0.003848	cg04689061	-0.01008	cg00573330	-0.005221	cg10695848	-0.006069	cg18258224	-0.006953	cg18051461	-0.004028	cg05951576	-0.00504
cg01597480	-0.00176	cg03306024	-0.002621	cg22114489	-0.0005701	cg22058990	-0.004685	cg05762694	-0.001276	cg04424443	-0.002255	cg21204020	-0.008038	cg02998620	-0.002887	cg08521684	-0.003844	cg13797825	-0.01008	cg18880897	-0.005221	cg09177567	-0.006066	cg05015635	-0.006952	cg06107816	-0.004017	cg26916780	-0.005039
cg05027458	-0.00176	cg14166485	-0.00262	cg07328888	-0.0005697	cg04895321	-0.004672	cg18781240	-0.001274	cg25541958	-0.002255	cg18866529	-0.008037	cg09029902	-0.002886	cg21030970	-0.003837	cg17468773	-0.01008	cg20048434	-0.005218	cg11203397	-0.006056	cg12530994	-0.006948	cg27429749	-0.004012	ch.X.1002740R	-0.005039
cg01783662	-0.001759	cg16962970	-0.00262	cg07012770	-0.000569	cg25061131	-0.004668	cg27347290	-0.001274	cg04852443	-0.002244	cg06913958	-0.00803	cg23531488	-0.002885	cg06412358	-0.003834	ch.X.1667329F	-0.01007	ch.X.108297408F	-0.005213	cg07278165	-0.006054	cg21865533	-0.006948	cg17222164	-0.00401	cg23415756	-0.005032
cg27347290	-0.001759	cg26934243	-0.00262	cg09978533	-0.0005686	ch.X.92435715F	-0.004667	cg03834031	-0.00127	cg02298094	-0.002242	cg12038696	-0.008027	cg06976598	-0.002883	cg21646955	-0.003833	cg17671608	-0.01006	cg24035962	-0.005205	cg01612366	-0.006051	cg24315421	-0.006936	cg17491987	-0.004004	cg24081819	-0.005031
cg12868173	-0.001758	cg04313875	-0.002611	cg07137955	-0.0005682	cg05908079	-0.004664	cg20943461	-0.00127	cg10851739	-0.002241	cg01750375	-0.008022	cg14830371	-0.002878	cg10406027	-0.003832	cg10932907	-0.01001	cg08505560	-0.005202	cg08872722	-0.006051	cg26762347	-0.006935	cg25522119	-0.003997	cg14262681	-0.005029
cg24480012	-0.001753	cg22189618	-0.002605	cg02236650	-0.0005661	cg16651732	-0.004663	cg08231348	-0.001269	cg13767001	-0.00224	cg10896862	-0.008005	cg02535219	-0.002869	cg25439632	-0.003822	cg16223546	-0.01001	cg14376467	-0.005194	cg21597595	-0.006045	cg13299776	-0.006923	cg14060111	-0.003996	cg06498520	-0.005019
cg23174932	-0.001752	cg06913958	-0.002603	cg26916780	-0.0005659	cg06974755	-0.004657	cg23907053	-0.001268	cg04846710	-0.002239	cg17276002	-0.008	cg18110444	-0.002866	cg24793124	-0.003821	cg21402832	-0.01001	cg27533237	-0.005179	ch.X.57019131F	-0.006044	cg06254440	-0.006918	cg09980622	-0.003994	cg07328888	-0.005019
cg23583920	-0.001752	cg05457273	-0.002599	cg26685941	-0.0005649	cg06679694	-0.004656	cg00035000	-0.001266	cg10842095	-0.002239	cg00738869	-0.007997	cg02161478	-0.002861	cg02156680	-0.003819	cg24059154	-0.009997	cg06662568	-0.005173	cg08230658	-0.006036	cg12038696	-0.006914	cg26916780	-0.003986	cg11270042	-0.005019
cg00506629	-0.00175	cg20979153	-0.002598	cg10191210	-0.0005641	cg24770596	-0.004654	cg25694349	-0.001266	cg14305711	-0.002239	cg14305711	-0.007993	cg25586410	-0.002861	cg16653495	-0.003819	cg02401399	-0.009988	cg18352516	-0.005172	cg27547873	-0.006026	cg02057833	-0.006906	cg13283691	-0.003984	cg17671280	-0.005014
cg11696475	-0.00175	cg02119927	-0.002592	cg04452959	-0.0005627	cg04743609	-0.004652	cg07211894	-0.001264	cg18566883	-0.002239	cg22958957	-0.007982	cg08662757	-0.00286	cg23012579	-0.003818	cg14417954	-0.009988	cg18759693	-0.005172	cg24531915	-0.006025	cg15626828	-0.006903	cg21682474	-0.003983	cg02045355	-0.005011
cg24191463	-0.001749	cg25693289	-0.002592	cg22460123	-0.0005621	cg18129748	-0.004651	cg25451958	-0.001264	cg18629334	-0.002239	cg08799922	-0.00797	cg14284211	-0.00286	cg11569486	-0.003813	cg25859998	-0.009974	cg20001829	-0.005172	cg20430847	-0.006022	cg19337852	-0.006868	cg18474180	-0.00398	cg10296410	-0.005008
cg04013595	-0.001747	cg18629334	-0.002588	cg18555073	-0.000562	cg03306024	-0.004648	cg13510327	-0.001263	cg11831003	-0.002232	cg24081819	-0.007949	cg25868286	-0.002858	cg12158737	-0.003812	cg25868286	-0.009966	cg17586256	-0.005154	cg00325866	-0.006018	cg24059154	-0.006862	cg18759693	-0.00397	cg16761581	-0.005007
cg06679694	-0.00174	cg26607828	-0.002586	cg12196573	-0.0005617	cg12391352	-0.004648	cg06254440	-0.001262	cg21992238	-0.002227	cg03476007	-0.007939	cg18422875	-0.002855	cg26642510	-0.003805	cg21032292	-0.009952	cg21210224	-0.005154	cg01422262	-0.006018	cg11019430	-0.006861	cg25587091	-0.003968	cg12855166	-0.005004
cg26924496	-0.001739	cg02971546	-0.002585	cg01981762	-0.0005614	cg19597031	-0.00464	cg15543281	-0.001258	cg06230948	-0.002225	cg16958524	-0.007935	cg24700485	-0.002855	cg07431286	-0.003799	ch.X.97651759F	-0.009943	cg05608844	-0.005153	cg02741554	-0.006013	cg07865517	-0.006857	cg21364560	-0.003962	cg07170300	-0.004999
cg00145177	-0.001737	cg10543450	-0.002585	cg24529484	-0.0005614	cg09669930	-0.004625	cg01950665	-0.001257	cg15013019	-0.002222	cg01202265	-0.007933	cg16521978	-0.002854	cg17661462	-0.003798	cg05683227	-0.00993	cg13250001	-0.005143	cg18532727	-0.006013	cg10817615	-0.006851	cg02126753	-0.003954	cg00702638	-0.004984
cg19657603	-0.001737	cg15042080	-0.002585	cg21210224	-0.0005611	cg25439632	-0.004624	cg06621373	-0.001257	cg03839949	-0.00222	cg02119927	-0.007928	cg13273789	-0.00285	cg11393185	-0.003787	cg21697198	-0.009923	cg18483529	-0.005141	cg01901107	-0.006006	cg09693106	-0.006849	cg03364683	-0.003951	cg02161478	-0.004983
cg21263122	-0.001737	cg02642123	-0.002584	cg05249026	-0.000561	cg16356456	-0.004617	cg07905444	-0.001257	cg13910860	-0.002216	cg06361405	-0.007928	cg26685941	-0.00285	cg19099843	-0.003783	cg05038216	-0.009905	cg17468773	-0.005139	cg00765922	-0.006004	cg27326687	-0.006836	cg15361065	-0.003943	cg01434608	-0.004981
cg04106636	-0.001736	cg06119711	-0.002582	cg13510327	-0.0005608	cg24190308	-0.004617	cg12824782	-0.001257	cg07045891	-0.002214	cg03741862	-0.007859	cg00262446	-0.002849	cg26530485	-0.003782	cg19826026	-0.009905	cg16223546	-0.005138	cg09258479	-0.006002	cg06822689	-0.006825	cg25124966	-0.003935	cg24059154	-0.004981
cg00810208	-0.001735	cg10842095	-0.002582	cg03476007	-0.0005606	cg06627077	-0.004613	cg05731870	-0.001256	cg11162118	-0.002211	cg16957313	-0.007854	cg00117172	-0.002848	cg02396676	-0.003774	cg21210224	-0.009894	cg25851152	-0.005137	cg03824122	-0.005999	cg25016544	-0.006824	cg03834031	-0.003934	cg24488739	-0.004981
cg13495369	-0.001732	cg04982951	-0.002575	cg00117172	-0.0005598	cg20943039	-0.004613	cg01130792	-0.001255	cg13088406	-0.00221	cg06118999	-0.007846	cg08331313	-0.002848	cg08680048	-0.003773	cg16596367	-0.00989	cg11334818	-0.005132	cg19793905	-0.005995	cg16335762	-0.006823	cg15701237	-0.003932	cg14579997	-0.004971
cg24922129	-0.001731	cg16938490	-0.002575	cg09689449	-0.0005584	cg05009684	-0.004608	cg14120215	-0.001255	cg09896120	-0.002209	cg20048434	-0.007837	cg10713589	-0.002845	ch.X.97651759F	-0.003773	cg09693106	-0.009881	cg00294109	-0.005123	cg20918957	-0.005991	cg23173466	-0.006818	cg12427321	-0.003926	cg06413398	-0.004966
cg02077793	-0.001727	cg07941983	-0.002573	cg26113448	-0.0005584	cg13580286	-0.004604	cg23551494	-0.001255	cg06604467	-0.002203	cg24700663	-0.007834	cg13299776	-0.002844	cg22081371	-0.003767	cg10587854	-0.009875	cg18617679	-0.005113	cg22606224	-0.005987	cg10342722	-0.006809	cg15184687	-0.003926	cg27118059	-0.004961
cg17768957	-0.001723	cg04123409	-0.002572	cg05984244	-0.0005581	cg24906525	-0.004603	cg10406027	-0.001254	cg04718845	-0.002202	cg22790973	-0.007819	cg02396676	-0.002843	cg02172652	-0.003763	cg16356456	-0.009862	cg17082661	-0.00511	cg17572800	-0.005979	cg10985914	-0.006802	ch.X.42405548R	-0.00392	cg11594940	-0.00496
cg13851508	-0.001719	cg00674304	-0.002569	cg17163527	-0.0005575	cg21037184	-0.004602	cg13422850	-0.001254	cg06793974	-0.002202	cg04174211	-0.007816	cg08218061	-0.002843	cg05060949	-0.003763	cg06118999	-0.009847	ch.X.938089F	-0.005107	cg21913319	-0.005979	cg14305711	-0.006802	cg27558095	-0.003918	cg17491987	-0.004958
cg18801599	-0.001719	cg10942903	-0.002569	cg24114154	-0.0005571	cg00541544	-0.004596	cg18284089	-0.001253	cg03466124	-0.002198	cg08424184	-0.007814	cg14420108	-0.002843	cg21577472	-0.003762	cg14660125	-0.009838	cg01094748	-0.005102	cg06321883	-0.005957	cg25924694	-0.006801	cg11777890	-0.003916	ch.X.120845377F	-0.004956
cg23821329	-0.001719	cg23470850	-0.002566	cg00810208	-0.0005569	cg02315597	-0.004591	cg00255142	-0.001252	cg01492656	-0.002197	cg18241829	-0.007798	cg00680551	-0.002836	cg06422883	-0.003761	cg23054321	-0.009834	cg09669930	-0.005099	cg10406027	-0.005957	cg02154956	-0.006796	cg09177567	-0.003913	cg17671608	-0.004954
cg00041084	-0.001717	cg02417084	-0.002561	cg23954922	-0.0005568	cg09723781	-0.004573	cg22058990	-0.001252	cg16817070	-0.002197	cg01797371	-0.007791	cg25513173	-0.002832	cg23786580	-0.003761	cg18801599	-0.009807	cg03712758	-0.005098	cg12462705	-0.005947	cg11219400	-0.006791	cg07278165	-0.003912	cg18629334	-0.004949
cg04636841	-0.001714	cg24755910	-0.002558	cg23564243	-0.0005567	cg06198190	-0.004572	cg17838026	-0.001248	cg25439632	-0.002191	cg24333845	-0.007789	cg23525243	-0.002828	cg08988364	-0.003758	cg10896862	-0.009802	cg14063191	-0.005098	cg21056723	-0.00594	cg02998620	-0.006788	cg04576568	-0.003911	cg09693106	-0.004942
cg00707452	-0.001711	cg27465717	-0.002558	cg04845871	-0.0005561	cg21364560	-0.004568	cg16847696	-0.001247	cg26385074	-0.00219	cg06413398	-0.007782	cg09415272	-0.002826	cg10150686	-0.003757	cg00232402	-0.009792	cg04829853	-0.005096	cg06741198	-0.005939	cg19216198	-0.006781	cg11567001	-0.00391	cg12656077	-0.004936
cg00890041	-0.001709	cg13939204	-0.002557	cg15148757	-0.0005556	cg06685968	-0.004566	cg01612366	-0.001245	cg01342196	-0.002189	cg06981182	-0.007779	cg09591072	-0.002826	cg13453904	-0.003752	cg21913319	-0.009792	cg04109822	-0.005093	cg12178980	-0.005939	cg21895593	-0.006771	cg18101249	-0.00391	cg21895593	-0.004935
cg14597534	-0.001709	cg06981182	-0.002556	cg26422161	-0.0005539	cg02245794	-0.004563	cg08129312	-0.001243	cg09374774	-0.002189	cg03065202	-0.007774	cg13485564	-0.002826	cg10555307	-0.003751	cg19515245	-0.009787	cg04225368	-0.005085	cg09655782	-0.005931	cg08244848	-0.006768	cg22783363	-0.00391	cg10553088	-0.004931
cg07463059	-0.001708	cg22451358	-0.002556	cg01020263	-0.0005521	cg18352516	-0.004554	cg12448724	-0.001243	cg11185792	-0.002184	cg04739306	-0.00776	cg16146033	-0.002825	cg08587775	-0.00375	cg24610274	-0.009783	cg16335762	-0.005072	cg26653360	-0.005923	cg12145080	-0.006761	cg14822966	-0.003909	cg12664209	-0.004931
cg18629334	-0.001706	cg06654127	-0.002554	cg00091483	-0.0005519	cg25016544	-0.004547	cg07859439	-0.001241	cg04875789	-0.002183	cg11769400	-0.00774	cg01673669	-0.00282	cg03805475	-0.003745	cg11731221	-0.009769	cg12421686	-0.005068	cg02632185	-0.005903	cg05694021	-0.006758	cg05075176	-0.003907	cg11067907	-0.004925
cg09853371	-0.001703	cg08424184	-0.00255	cg23432345	-0.0005511	cg06347698	-0.004539	cg00343092	-0.001239	cg10523105	-0.002182	cg25135018	-0.007737	cg10585371	-0.002817	cg04581938	-0.003743	cg07201215	-0.009767	ch.X.23343928R	-0.005067	cg00409917	-0.0059	cg12577010	-0.006757	cg10227187	-0.003902	cg01797371	-0.004924
cg17215036	-0.001702	cg04367351	-0.002549	cg01567239	-0.000551	cg14572967	-0.004537	cg18441811	-0.001238	cg24948962	-0.002181	cg17419623	-0.007736	cg09896120	-0.002816	cg14714537	-0.003743	cg12427321	-0.00973	cg01526210	-0.005065	cg06412358	-0.005896	cg00448761	-0.006753	cg20117153	-0.0039	cg22885965	-0.004916
cg04672538	-0.0017	cg26376245	-0.002548	cg24610274	-0.0005509	cg05026135	-0.004536	cg20123891	-0.001237	cg22801992	-0.00218	cg22256433	-0.007735	cg06621373	-0.002813	cg06731639	-0.00374	cg24488739	-0.009718	cg24638647	-0.005062	cg12352038	-0.005892	cg02481642	-0.006752	cg00765922	-0.003894	cg01585860	-0.004915
cg14689537	-0.001697	cg15778012	-0.002542	cg26956245	-0.0005502	cg08920174	-0.004536	cg02245794	-0.001236	cg18693345	-0.002179	cg14639897	-0.007734	cg15063322	-0.002813	cg26337020	-0.003737	cg24580071	-0.009717	cg16761581	-0.00506	cg04100595	-0.005884	cg06422883	-0.006742	cg14093715	-0.003892	cg05327835	-0.004914
cg17838026	-0.001694	cg23615676	-0.002542	cg07941983	-0.0005496	cg07431286	-0.004531	cg27326452	-0.001235	cg08331313	-0.002177	cg13986130	-0.007732	cg17342973	-0.002808	cg04472725	-0.003735	cg00906319	-0.009714	cg25456477	-0.00506	cg18258224	-0.005884	cg01901107	-0.006736	cg08872722	-0.003889	cg00765922	-0.00491
cg20979153	-0.001694	cg01696193	-0.002538	cg19783626	-0.0005493	cg05191175	-0.004524	cg13717446	-0.001234	cg20776829	-0.002172	cg10948359	-0.007729	cg08284213	-0.002805	cg08640252	-0.003734	cg27499820	-0.009712	cg14417954	-0.005052	cg22093805	-0.005884	cg01312858	-0.006731	cg12169977	-0.003885	cg24671939	-0.004907
cg12436196	-0.001689	cg05490659	-0.002538	cg09696121	-0.0005487	cg17586256	-0.004523	cg22957135	-0.001234	cg09693106	-0.00217	cg18263166	-0.007727	cg13475583	-0.002804	cg22790973	-0.003734	cg12134570	-0.00971	cg24333845	-0.005048	cg04276084	-0.005876	cg04756279	-0.006716	cg20957095	-0.003878	cg18051461	-0.004905
cg15996480	-0.001687	cg26478401	-0.002536	cg04051571	-0.0005485	cg09654247	-0.004521	cg00351011	-0.001233	cg22359781	-0.00217	cg02289189	-0.007725	cg18801599	-0.002803	cg16716750	-0.003732	cg03012821	-0.009697	cg21204020	-0.005047	cg00286853	-0.005874	cg18617679	-0.006694	cg03048083	-0.003866	cg18474180	-0.004904
cg22194948	-0.001686	cg24361291	-0.002535	cg18022012	-0.0005484	cg25626427	-0.004521	cg06487301	-0.001232	cg12824782	-0.002169	cg16223546	-0.007724	cg04852443	-0.002801	cg14305711	-0.003729	cg10393598	-0.009697	cg13215970	-0.005043	cg27326452	-0.00587	cg17671608	-0.00668	cg02196651	-0.003856	cg19422030	-0.004898
cg12913097	-0.001685	cg05643303	-0.002533	cg00156336	-0.0005482	cg00476317	-0.004518	cg17543123	-0.001232	cg15579587	-0.002168	cg12439977	-0.007721	cg10150686	-0.002801	cg02481642	-0.003727	cg14572967	-0.009694	cg04204967	-0.005041	cg26127778	-0.005852	cg22832061	-0.00668	cg09367425	-0.003852	ch.X.256253R	-0.00489
cg25035392	-0.001682	cg12868173	-0.002533	cg14219290	-0.0005474	cg00782174	-0.004518	cg24360197	-0.001231	cg02237629	-0.002166	cg18110444	-0.007702	cg03508786	-0.002799	cg03254465	-0.003719	cg20383155	-0.009685	cg17820591	-0.00504	cg13084458	-0.00585	cg00782174	-0.006669	cg26835302	-0.003852	cg08999915	-0.004888
cg25110126	-0.001682	cg09568647	-0.002531	cg04663932	-0.0005471	cg18396832	-0.004518	cg09398924	-0.00123	cg09792711	-0.002166	cg15001131	-0.007695	cg11342670	-0.002799	cg16110940	-0.003714	cg04204967	-0.009661	cg22444720	-0.005038	cg07701237	-0.005845	cg07531860	-0.006659	cg14305711	-0.003851	cg10685559	-0.004887
cg18031596	-0.00168	cg00403955	-0.002523	cg15462501	-0.0005467	cg20957095	-0.004517	cg07110659	-0.001227	cg13686615	-0.002162	cg03094193	-0.007692	cg19515245	-0.002798	cg18381051	-0.003712	cg06998282	-0.009654	cg19789466	-0.005032	cg11026555	-0.005843	cg20001829	-0.006657	cg04619627	-0.003849	cg11525479	-0.004886
ch.X.97651759F	-0.001677	cg23999695	-0.002523	cg27216998	-0.0005462	cg03662064	-0.004516	cg27279991	-0.001226	ch.X.42405548R	-0.002161	cg01282174	-0.007691	cg11387340	-0.002797	cg15579587	-0.003705	cg06383124	-0.009646	cg23833896	-0.005032	cg05683227	-0.00584	cg13573036	-0.00665	cg23627145	-0.003846	cg27045447	-0.004879
cg00450784	-0.001676	cg18709545	-0.002522	cg22958957	-0.0005459	cg05656364	-0.004516	cg01797371	-0.001225	cg10150686	-0.002157	cg24685134	-0.007689	cg12206423	-0.002796	cg24675344	-0.003694	cg14549976	-0.009631	cg26757053	-0.005027	cg17671608	-0.00584	cg04894169	-0.006644	cg04581613	-0.00384	cg13209122	-0.004876
cg07001545	-0.001676	cg26422161	-0.002522	cg07960154	-0.0005444	cg23907053	-0.004515	cg09138445	-0.001225	cg11416243	-0.002157	cg14710552	-0.007659	cg07652350	-0.002795	cg03270395	-0.003691	cg12352038	-0.009625	cg12610207	-0.005023	cg02097309	-0.005838	cg26386886	-0.006641	cg01627847	-0.003839	cg13442428	-0.004859
cg18456523	-0.001676	cg18261069	-0.002521	cg02899346	-0.0005443	cg08010362	-0.004514	cg20117153	-0.001224	cg07139440	-0.002153	cg12206423	-0.007653	cg13209122	-0.002795	cg11402586	-0.003688	cg09467501	-0.009623	cg00107603	-0.005007	ch.X.92543860F	-0.005836	cg18405140	-0.006637	cg21200382	-0.00383	cg15361065	-0.004857
cg04877910	-0.001675	cg14956327	-0.002518	cg14120215	-0.0005442	cg05318142	-0.004512	cg16978914	-0.001223	cg18396832	-0.002153	cg18419977	-0.007649	cg18352516	-0.002794	cg17159058	-0.003688	cg23595222	-0.009619	cg13847066	-0.005006	cg14305711	-0.00583	cg13250001	-0.006635	cg03025135	-0.003829	cg05103387	-0.004856
cg18781240	-0.001675	cg01528792	-0.002514	cg18094907	-0.0005442	cg01080924	-0.004503	cg04013595	-0.001222	cg10958362	-0.002151	cg04581938	-0.007635	cg14120215	-0.002791	cg10985914	-0.003685	cg06731639	-0.009607	cg07865517	-0.004988	cg10938586	-0.005829	cg07693238	-0.006633	cg11424456	-0.003827	cg08317263	-0.004853
cg16368750	-0.001674	cg09268729	-0.002514	cg04673590	-0.0005441	cg19135706	-0.004503	cg23520930	-0.001222	cg10169869	-0.00215	cg14131272	-0.007634	cg03254465	-0.002782	cg00938619	-0.003684	ch.X.112118442F	-0.009605	cg12530994	-0.004987	cg08079596	-0.005825	cg23086720	-0.006622	cg07463059	-0.003825	cg20824867	-0.004846
cg09672358	-0.001668	cg00255142	-0.002512	cg25131544	-0.0005441	cg06942027	-0.004498	cg05148373	-0.001221	cg10406027	-0.002146	cg22460123	-0.007627	cg22349573	-0.002782	cg04908588	-0.003684	cg08879559	-0.009604	cg04174211	-0.004985	cg00828689	-0.005814	cg00294109	-0.006617	cg13209122	-0.003825	cg12622139	-0.004844
cg23252902	-0.001668	cg09261020	-0.002512	cg00578252	-0.0005431	cg08909806	-0.004496	cg13051728	-0.001221	cg18073151	-0.002145	cg15626828	-0.007625	cg18825419	-0.002781	cg25456477	-0.003684	cg02481642	-0.009596	cg22827124	-0.004983	cg09763162	-0.005808	cg19965941	-0.006614	cg13009608	-0.003824	cg14417954	-0.004844
cg09696121	-0.001667	cg24081819	-0.00251	cg12551029	-0.0005426	cg14120215	-0.004493	cg16379337	-0.001218	cg08578245	-0.002142	cg02043070	-0.007624	cg07161369	-0.002779	cg16761581	-0.003683	cg14215459	-0.009592	cg00405699	-0.00498	cg13355041	-0.005808	cg25673948	-0.006608	cg22349506	-0.003819	cg26421286	-0.004837
cg23563008	-0.001667	cg09420439	-0.002509	cg07144296	-0.0005418	cg08122140	-0.004491	cg27640794	-0.001215	cg22112051	-0.002142	cg14579997	-0.007616	cg17001566	-0.002779	cg10951873	-0.003681	cg12105450	-0.009571	cg05643592	-0.004978	cg08727535	-0.005799	cg06652329	-0.006604	cg27355456	-0.003819	cg24691336	-0.004835
cg01491219	-0.001662	cg03287340	-0.002506	cg23563008	-0.0005414	cg20801464	-0.004491	cg00765922	-0.001214	cg08281415	-0.00214	cg16650717	-0.007612	cg07382923	-0.002777	cg08872722	-0.00368	cg15571330	-0.00957	cg17491987	-0.004976	cg22846826	-0.005797	cg09723781	-0.006592	cg12486308	-0.003814	cg23930334	-0.004833
cg00339300	-0.001661	cg02161478	-0.002505	cg16326242	-0.0005411	cg20585088	-0.00449	cg06933574	-0.001214	cg19638477	-0.00214	cg26796190	-0.0076	cg23601030	-0.002777	cg08079596	-0.003677	cg06419432	-0.009566	cg16624272	-0.004975	cg23691090	-0.005797	cg24932686	-0.006587	cg05626764	-0.003813	cg19397128	-0.004818
cg26916780	-0.00166	cg12196573	-0.002504	cg09763162	-0.0005409	cg13134448	-0.004479	cg09063944	-0.001214	cg20048434	-0.00214	cg17801546	-0.007597	cg23012579	-0.002776	cg17864044	-0.003677	cg12530994	-0.009562	cg22718891	-0.004968	cg02396676	-0.005793	cg23919433	-0.006586	cg25125453	-0.003809	ch.X.92435715F	-0.004816
cg06927775	-0.001658	cg17851046	-0.002504	cg06198190	-0.0005407	cg07537734	-0.004477	cg10958362	-0.001214	ch.X.108297408F	-0.002137	cg14093715	-0.007596	cg08424184	-0.002775	cg03063658	-0.003675	cg22104578	-0.009558	cg02196651	-0.004962	cg03012821	-0.005787	cg25522119	-0.006583	cg21895593	-0.003808	cg03641748	-0.004812
cg08647349	-0.001658	cg23045594	-0.002504	cg15459780	-0.0005402	cg08647349	-0.004475	cg00107603	-0.001213	cg09278098	-0.002136	cg13475583	-0.007578	cg05810170	-0.002774	cg14085017	-0.003673	cg09182533	-0.009553	cg13981380	-0.004959	cg19216198	-0.00578	cg05951576	-0.006579	cg17475456	-0.003806	cg08811314	-0.004808
cg26824216	-0.001658	cg01567239	-0.002502	cg06882298	-0.0005397	cg12621171	-0.004475	cg14219290	-0.001212	cg14830371	-0.002135	cg26487948	-0.007577	cg04464940	-0.002773	cg16173191	-0.003668	cg05060949	-0.009548	cg20430847	-0.004957	cg24139898	-0.005775	cg17956079	-0.006575	cg05327835	-0.003799	cg02788637	-0.004805
cg03854765	-0.001657	cg25741023	-0.0025	cg01636650	-0.0005396	cg04134048	-0.004466	cg09763162	-0.001211	cg25957967	-0.002127	cg00680551	-0.007576	cg07941983	-0.002773	cg06861572	-0.003667	cg22078451	-0.009506	cg24675344	-0.004952	cg08281415	-0.005774	cg19924948	-0.006547	cg15520443	-0.003798	cg08079596	-0.004802
cg19697530	-0.001657	cg16379337	-0.002498	cg11947493	-0.0005393	cg16018211	-0.004458	ch.X.108297408F	-0.00121	cg00025357	-0.002126	cg02466588	-0.007576	cg15079315	-0.002768	cg21064916	-0.003665	cg22827210	-0.009487	cg02741554	-0.00495	cg07201215	-0.005772	cg07139440	-0.006543	cg05412028	-0.003792	cg01180513	-0.004793
cg16585827	-0.001655	cg25135018	-0.002498	cg06693487	-0.0005389	cg10905180	-0.004454	cg16547579	-0.001208	cg01080924	-0.002123	cg13836518	-0.007576	cg04581938	-0.002763	cg14753355	-0.003651	cg25408314	-0.00948	cg02986494	-0.004944	cg09182533	-0.005771	ch.X.409130R	-0.006543	cg21395152	-0.003787	cg13414478	-0.004793
cg02853703	-0.001652	cg26744375	-0.002498	cg06685968	-0.0005387	cg20451226	-0.004453	cg09159285	-0.001207	cg07372034	-0.002123	cg20979153	-0.007568	cg11624479	-0.002762	cg04032226	-0.003647	cg24830619	-0.009473	cg12178980	-0.004944	cg24081819	-0.005768	cg00041328	-0.006536	cg10040922	-0.003772	cg22832061	-0.004791
cg11776014	-0.001651	cg04106636	-0.002494	cg16650717	-0.0005376	cg14830402	-0.004451	cg25957967	-0.001207	cg08317263	-0.002123	cg06107816	-0.007557	cg23244022	-0.002759	cg26846424	-0.003647	cg22732101	-0.009456	cg25245082	-0.004936	cg15571330	-0.005765	cg10296410	-0.006531	cg22046408	-0.003771	ch.X.108369489R	-0.004791
cg18256790	-0.001651	cg06829366	-0.002491	cg13703049	-0.0005375	cg18555073	-0.004451	cg16653495	-0.001205	cg08218061	-0.002122	cg14206898	-0.007555	cg23139609	-0.002758	cg14420108	-0.003642	cg17353698	-0.009454	cg05759347	-0.004935	cg18801599	-0.005761	cg20721917	-0.006529	cg12238593	-0.003769	cg06913958	-0.00479
cg25092838	-0.001651	cg16666964	-0.002489	cg04109822	-0.0005373	cg26744375	-0.004445	cg23166970	-0.001205	cg22230538	-0.002122	cg06679694	-0.00755	cg01750375	-0.002755	cg01422262	-0.003637	cg25287071	-0.009441	cg24875854	-0.004931	cg06740227	-0.005758	cg04845871	-0.00652	cg01422262	-0.003767	cg00025357	-0.004781
cg05694021	-0.00165	cg12551029	-0.002486	cg15054077	-0.0005364	cg01031400	-0.004444	cg10695848	-0.001204	cg08170757	-0.002121	cg01434562	-0.007547	cg26796190	-0.002755	cg23691090	-0.003634	cg27188703	-0.009434	cg07723365	-0.004927	cg08244848	-0.00575	cg23201812	-0.006518	ch.X.97651759F	-0.003767	cg12178980	-0.00478
cg06702880	-0.00165	cg20869673	-0.002482	cg20801056	-0.000536	cg16084872	-0.004444	cg25911901	-0.001204	cg18422875	-0.002121	cg20641465	-0.007546	cg05060949	-0.002754	cg16624272	-0.003632	cg23347429	-0.009433	cg02506867	-0.004924	cg19493077	-0.005746	cg08774969	-0.006514	cg02888113	-0.003766	cg06800840	-0.004772
cg10332787	-0.001646	cg15650509	-0.002481	cg04812509	-0.0005359	cg01783662	-0.004438	cg08996521	-0.001203	cg19597031	-0.002119	cg26437123	-0.007541	cg00412337	-0.002751	cg04174211	-0.003625	cg04581613	-0.009421	cg05966978	-0.004917	cg15013019	-0.00574	cg15716680	-0.006511	cg20917083	-0.003763	cg01020263	-0.004769
cg02297063	-0.001644	cg27186774	-0.002477	cg12868173	-0.0005354	cg23595222	-0.004438	cg17965712	-0.001203	cg20287640	-0.002118	cg04411841	-0.007535	cg25183082	-0.00275	cg06118999	-0.003622	cg21487261	-0.009421	cg24535130	-0.004915	cg01526210	-0.005737	cg14284211	-0.006503	cg01813071	-0.003756	cg04404540	-0.004769
cg24567694	-0.001644	cg07849384	-0.002476	cg04597532	-0.0005353	cg22973042	-0.004436	cg21992238	-0.001203	cg07751641	-0.002117	cg24862483	-0.007533	cg12038696	-0.002749	cg17668731	-0.003613	cg04066019	-0.009409	cg12373084	-0.004912	cg07443287	-0.005735	cg08284213	-0.006498	cg26906217	-0.003755	cg24888989	-0.004748
cg15481636	-0.001643	cg12717594	-0.002475	cg05038216	-0.0005347	cg16653495	-0.004434	cg03839949	-0.0012	cg04672538	-0.002116	cg08110488	-0.007532	cg22114489	-0.002742	cg04917511	-0.003612	cg11857997	-0.009404	cg10932907	-0.004908	cg09845785	-0.005734	cg04513006	-0.006497	cg12105450	-0.003748	cg24906525	-0.004734
cg16958524	-0.001643	cg11672054	-0.002474	cg09805405	-0.0005347	cg17552333	-0.004434	cg13442428	-0.0012	cg05726195	-0.002115	cg14420108	-0.007524	cg10536999	-0.00274	cg11194994	-0.00361	cg27542399	-0.009393	cg08218061	-0.004906	cg13414478	-0.005734	cg16356456	-0.006493	cg11827082	-0.003746	cg11380830	-0.004731
cg23976499	-0.001641	cg15471815	-0.002473	cg25524962	-0.0005345	cg01020263	-0.004433	cg19192223	-0.0012	cg15487105	-0.002115	cg01461199	-0.00752	cg05418487	-0.002738	cg18187680	-0.00361	cg10088041	-0.009391	cg04689061	-0.004904	cg00898683	-0.005731	cg09367425	-0.006492	cg20801464	-0.003743	cg01750375	-0.004729
cg06317507	-0.00164	cg13686615	-0.002472	cg00804078	-0.0005341	cg00574958	-0.00443	cg01636650	-0.001198	cg11482422	-0.002114	cg15162330	-0.007519	cg04728480	-0.002736	cg14450605	-0.003608	cg13914324	-0.00939	cg13534901	-0.004903	cg04472725	-0.005718	cg22704326	-0.006482	cg15983109	-0.003741	cg14305711	-0.004726
cg05613447	-0.001639	ch.X.1023208F	-0.002472	cg00541544	-0.0005339	cg03483267	-0.00443	cg05624244	-0.001198	cg14426428	-0.002114	cg00768487	-0.007516	cg13071476	-0.002735	cg02283691	-0.003606	cg07654569	-0.009383	cg00286853	-0.0049	cg07328888	-0.005715	cg24081819	-0.006469	cg07722358	-0.003733	cg15768556	-0.004725
cg04645070	-0.001638	cg24393316	-0.002471	cg05359207	-0.0005327	cg06779469	-0.004428	cg11672054	-0.001198	cg26301565	-0.002114	cg12169977	-0.007511	cg23691090	-0.002735	cg00563873	-0.003603	cg05845319	-0.009372	cg26127778	-0.004884	cg16789592	-0.005704	cg13209122	-0.006465	cg00262446	-0.003729	cg25475056	-0.004717
cg11416243	-0.001637	cg11162118	-0.002468	cg02156680	-0.0005325	cg06565620	-0.004413	cg19669036	-0.001198	cg23725454	-0.002113	cg11424456	-0.007507	cg11500660	-0.002734	cg11528176	-0.003603	cg10851739	-0.009361	cg07537734	-0.004879	cg02378269	-0.005697	cg25859998	-0.006465	cg11900861	-0.003729	cg15993083	-0.004712
cg21992238	-0.001637	cg13554207	-0.002468	cg05027458	-0.0005323	cg03834031	-0.004409	cg26607828	-0.001198	cg26657240	-0.002111	ch.X.108369489R	-0.007507	cg25851152	-0.002726	cg20434825	-0.003597	cg20805367	-0.009358	cg13247581	-0.004879	cg24935042	-0.005685	cg05327835	-0.00646	cg16489610	-0.003729	cg04743609	-0.004702
cg22730029	-0.001637	cg18800827	-0.002468	cg09411730	-0.0005313	cg11831003	-0.004406	cg02854695	-0.001197	cg01118078	-0.00211	cg11857997	-0.007506	cg03061352	-0.002725	cg14900388	-0.003593	cg17287553	-0.009354	cg00785738	-0.004877	cg06419432	-0.005675	cg14093715	-0.006457	cg11500660	-0.003728	cg12249227	-0.004701
cg03309253	-0.001635	cg15795787	-0.002467	cg06654901	-0.0005307	cg23201549	-0.004406	cg06346667	-0.001197	cg04742550	-0.002103	cg23564243	-0.007504	cg26337020	-0.002724	cg08551615	-0.00359	cg06447552	-0.00935	cg09680447	-0.004863	cg07463059	-0.005674	cg21238414	-0.006456	cg06366937	-0.003726	cg16468729	-0.0047
cg06107816	-0.001635	cg26835302	-0.002467	cg14170545	-0.0005298	cg13250001	-0.004405	cg10091994	-0.001196	cg14120215	-0.002102	cg17423207	-0.007503	cg11393185	-0.002722	cg04829853	-0.003589	cg25421903	-0.009345	cg07751196	-0.004861	cg15394142	-0.005669	cg08885659	-0.006437	cg02719245	-0.003722	cg03476007	-0.004699
cg06118999	-0.001635	cg17468773	-0.002466	cg12613618	-0.0005295	cg09463047	-0.004403	cg09740037	-0.001194	cg18801599	-0.002102	cg02741554	-0.0075	cg18441811	-0.002719	cg15802555	-0.003585	cg08727535	-0.009344	cg03287340	-0.004857	ch.X.153018199F	-0.005664	cg10165071	-0.006431	cg11203397	-0.003722	cg26835302	-0.004699
cg00035000	-0.001634	cg04645070	-0.002465	cg14071579	-0.0005291	cg14614563	-0.004398	cg24228112	-0.001194	cg18148130	-0.002101	cg06193723	-0.00749	cg15056288	-0.002709	cg03306024	-0.003583	cg13355041	-0.009339	cg09805405	-0.00485	cg14841337	-0.005663	cg02825373	-0.00643	cg16789592	-0.003722	cg12708336	-0.004698
cg02687055	-0.001634	cg15786837	-0.002462	cg13071476	-0.0005286	cg15534084	-0.004397	cg25110126	-0.001194	cg02236650	-0.002098	cg21011133	-0.007487	cg12384572	-0.002698	cg15650509	-0.003578	cg10501828	-0.0093	cg15079315	-0.004842	cg05951576	-0.005662	cg02466588	-0.006425	cg16561266	-0.00372	cg13355041	-0.004696
cg09569536	-0.001634	cg08554257	-0.002459	cg05087842	-0.0005283	cg12206423	-0.004396	cg19389641	-0.001193	cg11018337	-0.002097	cg18801599	-0.007482	cg24922129	-0.002695	cg16650292	-0.003578	cg07537734	-0.009282	cg07890490	-0.004836	cg03025135	-0.00566	cg12691534	-0.006421	cg11165912	-0.003717	cg08578245	-0.004694
cg15056288	-0.001633	cg08604594	-0.002458	cg20344326	-0.0005282	cg00945038	-0.004392	cg05810170	-0.001192	cg04982951	-0.002096	cg08035323	-0.007468	cg14093715	-0.002689	cg26195178	-0.003575	ch.X.87262228F	-0.00928	cg04689023	-0.004835	ch.X.87262228F	-0.00566	ch.X.97651759F	-0.006421	cg02667677	-0.003713	cg08604594	-0.004693
cg23786580	-0.001632	cg04739306	-0.002455	cg23708763	-0.0005282	cg10317138	-0.004386	cg00138474	-0.001191	cg07282058	-0.002094	cg09591072	-0.007459	cg14888916	-0.002683	cg01859739	-0.003573	cg07510080	-0.009263	cg06422757	-0.00483	cg27145699	-0.005659	cg08424184	-0.006419	cg27279991	-0.003711	cg27428304	-0.004692
cg07045891	-0.001631	cg10305451	-0.002452	cg20979233	-0.0005281	cg11777890	-0.004386	cg02535219	-0.001191	cg23465465	-0.002094	cg06029700	-0.007434	cg21732383	-0.00268	cg22782986	-0.003569	cg02108623	-0.009253	cg04581613	-0.004812	cg07491109	-0.005655	cg07217350	-0.006413	cg02821342	-0.003706	cg17163527	-0.004688
cg10548034	-0.001631	cg11836236	-0.002452	cg25456477	-0.000528	cg12845520	-0.004385	cg18261069	-0.001189	cg01636650	-0.002093	cg12373208	-0.007429	cg06478823	-0.002678	cg08940001	-0.003564	cg08970347	-0.009249	cg05060704	-0.00481	cg10088041	-0.005654	cg04581938	-0.006412	cg06366981	-0.003705	cg15331039	-0.004683
cg08962682	-0.001626	cg03218797	-0.002451	cg20729747	-0.0005274	cg06303772	-0.004384	cg24085895	-0.001189	cg10944735	-0.002093	cg26685941	-0.007428	cg14206898	-0.002675	cg18475643	-0.003564	cg25456477	-0.009249	cg13865488	-0.004808	cg21573047	-0.005652	cg15387132	-0.006407	cg27141898	-0.003705	cg12800244	-0.004673
cg15668468	-0.001624	cg21900495	-0.002449	cg23967554	-0.000526	cg18441811	-0.004383	cg03802201	-0.001188	cg13668544	-0.002093	cg23450938	-0.007423	cg25694349	-0.002675	cg09736669	-0.003556	cg02986494	-0.009244	cg24369185	-0.004806	cg23000808	-0.00565	cg25575553	-0.006405	cg23833896	-0.003703	cg12256688	-0.004671
cg15563450	-0.001622	cg02619205	-0.002448	cg08746900	-0.0005252	cg14288091	-0.004382	cg13593448	-0.001187	cg16521978	-0.002092	cg04640677	-0.007421	cg08491125	-0.002674	cg12421686	-0.003555	cg24203709	-0.009243	cg01443426	-0.004805	cg06046574	-0.005645	cg18474180	-0.006403	cg15626828	-0.003698	cg07382943	-0.004666
cg17506553	-0.001621	cg07139440	-0.002447	cg26934243	-0.0005248	cg17540624	-0.004377	cg11879741	-0.001186	cg08774207	-0.00209	cg14572967	-0.007421	cg26642510	-0.00267	cg10713589	-0.003548	ch.X.1282647F	-0.009237	cg24830619	-0.004801	cg15375239	-0.005645	cg10414229	-0.006401	cg12177220	-0.003693	cg02193762	-0.00466
cg16335762	-0.00162	cg10313385	-0.002447	cg02245794	-0.0005235	cg18151987	-0.004374	cg20432671	-0.001186	cg12361223	-0.00209	cg18381051	-0.00742	cg01780754	-0.002669	cg00828689	-0.003543	cg10502118	-0.009231	cg13498289	-0.004797	cg16547579	-0.005644	cg21487261	-0.006399	cg03140883	-0.00369	cg18199554	-0.00466
cg07751641	-0.001617	cg08517286	-0.002444	cg11589139	-0.0005233	cg02958321	-0.004373	cg12478384	-0.001183	cg20369204	-0.002087	cg14126583	-0.007419	cg17861863	-0.002666	cg00412337	-0.003542	cg11382133	-0.009227	cg04144394	-0.004793	cg05893300	-0.005639	cg04797323	-0.006397	cg11696475	-0.00369	cg23595222	-0.00466
cg09930033	-0.001617	cg00668694	-0.002443	cg00448761	-0.0005231	cg15027115	-0.004372	cg14830371	-0.001179	cg23595222	-0.002087	cg12800244	-0.007404	cg22513169	-0.002666	cg15063322	-0.003542	cg27355456	-0.009225	cg08321576	-0.004791	cg01769457	-0.005632	cg08218061	-0.006388	cg09899173	-0.003684	cg10166205	-0.004657
cg24610274	-0.001615	cg20555674	-0.002439	cg11082691	-0.000523	cg13792823	-0.00437	cg03508786	-0.001178	cg19783626	-0.002086	cg10985914	-0.007396	cg19924948	-0.002665	cg04812509	-0.003538	cg19789466	-0.009212	cg26301565	-0.004788	cg07911953	-0.005628	cg00765922	-0.006373	cg14417954	-0.003684	cg21034023	-0.004656
cg05846707	-0.001612	cg25179291	-0.002437	cg17058475	-0.0005228	cg09258479	-0.004368	cg00506629	-0.001177	cg08774969	-0.002084	cg16655905	-0.007389	cg03623982	-0.002664	cg12352038	-0.003534	cg18151987	-0.009207	cg09978533	-0.004783	cg02408775	-0.005627	cg08122140	-0.00637	cg04829186	-0.003682	cg10714284	-0.004654
cg12036735	-0.001612	cg01750375	-0.002436	cg06347698	-0.0005227	cg19753794	-0.004368	cg24097797	-0.001176	cg24369185	-0.002081	cg24361291	-0.007389	cg11857997	-0.002664	cg17480467	-0.003534	cg23726566	-0.009206	cg13273789	-0.004783	cg20994084	-0.005627	cg15203735	-0.006353	cg15375239	-0.003673	ch.X.87262228F	-0.004654
cg09839443	-0.00161	cg12978575	-0.002434	cg00187933	-0.0005226	cg03113502	-0.004367	cg24567694	-0.001176	cg00938619	-0.002078	cg01094748	-0.007381	cg00279790	-0.002662	cg04009887	-0.003533	cg04829853	-0.009205	cg27429749	-0.004783	cg13273789	-0.005626	cg04989706	-0.006342	cg11525479	-0.00366	cg15369821	-0.00465
cg15187550	-0.00161	cg24321347	-0.002432	cg07067241	-0.0005219	cg13619915	-0.004361	ch.X.108369489R	-0.001176	cg02741554	-0.002076	cg05626259	-0.007381	cg01636650	-0.00266	cg25883083	-0.003533	cg25587069	-0.0092	cg12897947	-0.004777	cg25737323	-0.005626	cg04581613	-0.006335	cg26525127	-0.003656	cg10864145	-0.004649
cg22958957	-0.001609	cg16291276	-0.002431	cg09063944	-0.0005216	cg07587588	-0.00436	cg10099799	-0.001174	cg04032226	-0.002076	cg05822532	-0.007376	cg05457273	-0.00266	cg06918474	-0.003532	cg22782986	-0.009199	cg26269613	-0.004776	cg04677227	-0.005625	cg15184687	-0.006328	cg25796439	-0.003653	cg21111868	-0.004649
cg22973042	-0.001609	cg23595222	-0.00243	cg25040466	-0.0005216	cg24453118	-0.004359	cg27140247	-0.001174	cg11019430	-0.002073	cg00218447	-0.007365	cg25456477	-0.00266	cg04879755	-0.003529	cg17661462	-0.009195	cg08662757	-0.00477	cg14639897	-0.005624	cg27145699	-0.006325	cg27547873	-0.00365	cg04845871	-0.004643
cg08079596	-0.001608	cg25385412	-0.00243	cg12753787	-0.0005212	cg04820200	-0.004358	cg02236650	-0.001173	cg16146033	-0.002073	cg07161369	-0.007363	cg20979153	-0.002659	cg25851152	-0.003529	cg25344503	-0.009191	cg09357438	-0.00477	cg03641748	-0.005623	cg12479674	-0.00632	cg25524962	-0.003648	cg06478823	-0.004643
cg14598950	-0.001608	cg11696475	-0.002429	cg06913958	-0.0005207	cg01889143	-0.004355	cg16521978	-0.001173	cg17001566	-0.002072	cg11594940	-0.007356	cg07028533	-0.002658	cg01120165	-0.003528	cg24129382	-0.009184	cg21758133	-0.00477	cg04174211	-0.005619	cg13071476	-0.006318	cg14212266	-0.003647	cg07510080	-0.004643
cg01248080	-0.001607	cg04877910	-0.002427	cg25300386	-0.0005206	cg27542399	-0.00435	cg17768957	-0.001173	cg08129312	-0.002071	cg10708955	-0.007354	cg20824867	-0.002649	cg25016544	-0.003525	cg15450139	-0.009179	cg25809301	-0.00477	cg18748525	-0.005619	cg13247581	-0.006317	cg00218447	-0.003643	cg12526298	-0.004643
cg11624479	-0.001607	cg12361223	-0.002425	cg12181634	-0.0005205	cg00117172	-0.004348	cg04367351	-0.001172	cg09930017	-0.002067	cg26337020	-0.007352	cg06413398	-0.002648	cg26437123	-0.003523	cg26426447	-0.009179	cg14629021	-0.004768	cg27234864	-0.005619	cg15260466	-0.006311	cg01556075	-0.003643	cg17174775	-0.004635
cg23725454	-0.001607	cg06413398	-0.002423	cg09693106	-0.0005204	cg01000615	-0.004347	cg13250001	-0.001172	cg07091207	-0.002063	cg03884592	-0.007349	cg24081819	-0.002647	cg18441811	-0.003522	ch.X.68408155R	-0.009175	cg27563952	-0.004764	cg20001829	-0.005617	cg10838664	-0.00631	cg26505691	-0.003642	cg21032292	-0.004629
cg22374485	-0.001606	cg17768957	-0.002421	cg02194789	-0.0005202	cg01434608	-0.004344	cg26337020	-0.001172	cg02964396	-0.002056	cg11152384	-0.007346	cg26846424	-0.002646	cg26635208	-0.003521	cg10150686	-0.009174	cg08774207	-0.00476	cg10932907	-0.005613	cg10253929	-0.006303	cg04743609	-0.00364	cg11857997	-0.004628
cg26081071	-0.001605	cg24975564	-0.002421	cg06702880	-0.00052	cg13931999	-0.004342	cg17851046	-0.001171	cg04249706	-0.002056	cg17768957	-0.007341	cg08604594	-0.002645	cg01080924	-0.003519	cg05694021	-0.009171	cg22790973	-0.004759	cg19397128	-0.005611	cg18759693	-0.006303	cg12434587	-0.00364	cg07278165	-0.004624
cg06230736	-0.001604	cg01080924	-0.002416	cg24685998	-0.00052	cg00241638	-0.004341	cg24191463	-0.00117	cg12800244	-0.002053	cg22193385	-0.007336	cg00232402	-0.002643	cg16356456	-0.003517	cg07941983	-0.00917	cg20549620	-0.004758	cg21908259	-0.005608	cg12555646	-0.006289	cg25033817	-0.003638	cg06060137	-0.004623
cg18191418	-0.001604	cg01803928	-0.002412	cg26478401	-0.00052	cg08573893	-0.00434	cg09672358	-0.001168	cg23089549	-0.002051	cg27499820	-0.007333	cg09355771	-0.002643	cg05449136	-0.003515	cg23201812	-0.009159	cg13676119	-0.004757	cg23896514	-0.005605	cg08578245	-0.006278	cg07392449	-0.003636	cg12848345	-0.004623
cg08774969	-0.001603	cg06679694	-0.002412	cg25134515	-0.0005198	cg16868751	-0.004339	cg12479674	-0.001168	cg04525491	-0.00205	cg08554257	-0.007332	cg07431229	-0.002641	cg25882579	-0.003507	cg09148649	-0.009154	cg11183136	-0.00475	cg01612057	-0.005601	cg21715963	-0.006278	cg08491125	-0.003636	cg01498907	-0.004622
cg12600174	-0.001602	cg06246224	-0.002411	cg26577201	-0.0005197	cg17083506	-0.004337	cg14707269	-0.001167	cg00785738	-0.002048	cg10489124	-0.007331	cg04309911	-0.002639	cg04845871	-0.003504	cg27118035	-0.009141	cg25291138	-0.00475	cg04908588	-0.005601	cg09517751	-0.006277	cg02691192	-0.003631	cg02661802	-0.004619
cg00218447	-0.001601	cg09601912	-0.00241	cg22316269	-0.0005196	cg07362569	-0.004336	cg17491987	-0.001167	cg03254465	-0.002048	cg06945936	-0.007318	cg01210554	-0.002637	cg22256433	-0.003504	cg00218447	-0.009133	cg25720793	-0.00475	cg22104578	-0.0056	cg26426447	-0.00627	cg19826026	-0.003631	ch.X.112118442F	-0.004619
cg04618333	-0.001599	cg23564243	-0.002408	cg01491219	-0.0005193	cg06478823	-0.00433	cg23165752	-0.001167	cg09941112	-0.002047	cg02396676	-0.007317	cg14317609	-0.002637	cg10948359	-0.003502	cg22349573	-0.009133	cg12256688	-0.004748	cg23086720	-0.0056	ch.X.92448175R	-0.006269	cg25475056	-0.00363	cg27513574	-0.004616
cg24892139	-0.001599	cg26059153	-0.002406	cg26796190	-0.0005191	cg19431881	-0.00433	cg09693106	-0.001166	cg01750375	-0.002044	cg14351425	-0.007316	cg06913958	-0.002635	cg21869956	-0.003501	cg20824867	-0.009132	cg24713653	-0.004746	cg19702675	-0.005599	cg08505560	-0.00626	cg01434608	-0.003627	cg17872757	-0.004609
cg16560774	-0.001597	ch.X.57019131F	-0.0024	cg12259256	-0.0005187	cg24354581	-0.004329	cg15184687	-0.001165	cg12706425	-0.002044	cg09503596	-0.007312	cg20917083	-0.002634	cg08307963	-0.003497	cg03245734	-0.009127	cg02163885	-0.004745	cg10449866	-0.005598	cg01768201	-0.006252	cg13483603	-0.003626	cg21794428	-0.004609
cg15802555	-0.001596	cg03324578	-0.002398	cg13495369	-0.0005183	cg01443426	-0.004327	cg13919466	-0.001164	cg19672993	-0.002044	cg14284211	-0.007312	cg23989673	-0.002633	cg09672358	-0.003496	cg06929846	-0.00911	cg12462705	-0.004744	cg01750375	-0.005595	cg25195415	-0.006246	cg19724667	-0.003624	cg02964396	-0.004604
cg18077971	-0.001596	cg21577472	-0.002398	cg27218767	-0.0005183	cg21034023	-0.004323	cg11045814	-0.001163	cg27140247	-0.002044	cg11528176	-0.00731	cg08999915	-0.002631	cg20776829	-0.003483	cg18967534	-0.009096	cg16762778	-0.004743	cg08662757	-0.005594	cg20824867	-0.00623	cg09029902	-0.003623	cg10558228	-0.004604
cg21073859	-0.001596	cg04051571	-0.002397	cg14515996	-0.0005181	cg12232783	-0.004321	cg16801374	-0.001163	cg06162038	-0.00204	cg25868286	-0.007309	cg16716750	-0.002631	cg21011133	-0.003483	cg13414478	-0.009089	cg27127903	-0.004742	cg27118035	-0.005582	cg04100595	-0.006229	cg17979824	-0.003621	cg01438403	-0.0046
cg24081819	-0.001596	cg06204948	-0.002397	cg06118999	-0.000518	cg03324578	-0.00432	cg17934367	-0.001163	cg13422850	-0.002039	cg04663932	-0.007307	cg27627209	-0.002631	cg16855845	-0.003482	cg12155676	-0.009084	cg04037038	-0.004741	cg12594569	-0.00558	cg23197862	-0.006228	cg13442428	-0.00362	cg09930017	-0.004597
cg27003682	-0.001594	cg11344352	-0.002397	cg18479593	-0.0005177	cg23967554	-0.00432	cg02716635	-0.001162	cg24725522	-0.002039	cg00218103	-0.0073	cg24369185	-0.00263	cg26685941	-0.00348	cg01354296	-0.009082	cg02466588	-0.004738	cg13269407	-0.005578	cg08872722	-0.006224	cg23201812	-0.00362	cg08349497	-0.004589
cg15778012	-0.001593	cg18456523	-0.002397	cg03094193	-0.0005176	cg05886952	-0.004319	cg02980693	-0.001162	cg04138112	-0.002034	cg26731119	-0.0073	cg23564243	-0.002629	cg20414098	-0.003478	cg19216198	-0.009079	cg20576597	-0.004737	cg08578245	-0.005577	cg27409484	-0.006222	cg19673012	-0.003617	ch.X.92448175R	-0.004587
cg23615676	-0.001593	cg02194789	-0.002394	cg03508786	-0.0005164	cg24081819	-0.004319	cg09774007	-0.001162	cg05055760	-0.002033	cg13483603	-0.007291	cg20129717	-0.002628	cg26052635	-0.003474	cg12256688	-0.009078	cg08372947	-0.004734	cg26911220	-0.005577	cg14572967	-0.006221	cg21715963	-0.003617	cg12689375	-0.004574
cg03935432	-0.00159	cg14858267	-0.002394	cg05962325	-0.0005159	cg07890490	-0.004318	cg05087842	-0.00116	cg14919554	-0.002033	cg24770596	-0.007289	cg14119437	-0.002626	cg02620361	-0.003472	cg14563196	-0.009078	cg02154956	-0.00473	cg02577108	-0.005573	cg17215036	-0.006215	cg00523742	-0.003616	cg07693238	-0.004573
cg07137955	-0.00159	cg10673740	-0.002393	cg02493939	-0.0005157	cg06034933	-0.004317	cg01778994	-0.001159	cg22122410	-0.002033	cg09429735	-0.007287	cg00785738	-0.002625	cg16001811	-0.00347	cg00577865	-0.009074	cg07392085	-0.004727	cg11342670	-0.005569	cg22058990	-0.006212	cg20392842	-0.003616	cg27279991	-0.004565
cg13453904	-0.00159	cg21878650	-0.002391	cg06498720	-0.0005154	cg16146033	-0.004311	cg04907257	-0.001159	cg00662647	-0.002027	cg25150878	-0.007287	cg11084266	-0.002622	cg04916091	-0.003467	cg17432453	-0.00905	cg14093715	-0.004725	cg14063191	-0.005567	cg26723847	-0.006204	cg22871227	-0.003612	cg08347183	-0.004563
cg13543854	-0.001589	cg13888838	-0.002388	cg20735365	-0.0005153	cg23999695	-0.004311	cg12431483	-0.001159	cg13713283	-0.002027	cg19622662	-0.007283	cg19826026	-0.002622	cg22366088	-0.003466	cg14182566	-0.009031	cg15732812	-0.004725	cg12996903	-0.005565	cg20684180	-0.006197	cg18617679	-0.003608	cg20092046	-0.004558
cg01696193	-0.001587	cg04820200	-0.002385	cg20555674	-0.0005148	cg20943461	-0.004308	cg20943039	-0.001159	cg00286853	-0.002024	cg26195178	-0.007273	cg08811314	-0.002621	cg21642245	-0.003465	cg06621373	-0.009027	cg04472725	-0.004724	cg14539393	-0.005562	cg23261107	-0.006194	cg22135324	-0.003603	cg00343092	-0.004555
cg14900388	-0.001587	cg08148261	-0.002385	cg00450784	-0.0005145	cg06007607	-0.004307	cg10002178	-0.001158	cg26201952	-0.002023	cg26733301	-0.007271	cg25524962	-0.002621	cg02534163	-0.003463	cg17956079	-0.009019	cg06907405	-0.004723	cg10112391	-0.00556	cg04228935	-0.006192	cg03317045	-0.003602	cg11084266	-0.004546
cg03834031	-0.001584	cg21266502	-0.002382	cg17768957	-0.0005143	cg24633771	-0.004302	cg16560774	-0.001158	ch.X.557489R	-0.002021	cg04689061	-0.007267	cg04645070	-0.002619	cg08774452	-0.003461	cg08218061	-0.009017	cg15153383	-0.004721	cg23201812	-0.005559	cg25141943	-0.006192	cg04845871	-0.003599	cg24360197	-0.004545
cg08231348	-0.001584	cg17067190	-0.002381	cg00662647	-0.0005138	cg06029700	-0.0043	cg13758712	-0.001157	cg02396676	-0.00202	cg06118384	-0.007267	cg14710552	-0.002619	cg10585371	-0.003455	cg17163527	-0.009015	cg26720913	-0.004718	cg18880897	-0.005551	ch.X.1002740R	-0.006186	cg08325519	-0.003596	cg11018337	-0.004544
cg10357151	-0.001583	cg06621373	-0.00238	cg15650509	-0.0005136	cg14351425	-0.004299	cg14027891	-0.001157	cg01823541	-0.002019	cg20762861	-0.007259	cg27216998	-0.002618	cg15153383	-0.003454	cg14093715	-0.009014	cg14420108	-0.004716	cg12691534	-0.00555	cg08349497	-0.006183	cg06740227	-0.00359	cg05443922	-0.004542
cg12997720	-0.001581	cg26781303	-0.00238	cg14288091	-0.0005132	cg06320828	-0.004298	cg27144115	-0.001157	cg02298116	-0.002019	cg14753355	-0.007255	cg10393598	-0.002617	cg07443287	-0.003451	cg25453664	-0.00901	cg24228112	-0.004714	cg18486102	-0.005543	cg01721754	-0.006182	cg24671939	-0.00359	cg10501828	-0.004542
cg15745385	-0.001581	cg09321400	-0.002379	cg03584113	-0.0005128	cg10357151	-0.004297	cg12436196	-0.001156	cg02642123	-0.002019	cg22444720	-0.007245	cg11424456	-0.002617	cg19124509	-0.003442	cg26988617	-0.009008	cg05626764	-0.004711	cg02335642	-0.005539	cg04982951	-0.006182	cg27347290	-0.00359	cg19316148	-0.004539
cg01138981	-0.00158	ch.X.97651759F	-0.002376	cg06478823	-0.0005128	cg18109838	-0.004297	cg11674865	-0.001155	cg04636841	-0.002018	cg09669930	-0.007236	cg04819580	-0.002614	cg19241689	-0.003442	cg27283993	-0.009001	cg24488739	-0.004706	cg02172652	-0.005537	cg26216433	-0.006182	cg16761581	-0.003589	cg07282058	-0.004537
cg05419671	-0.001579	cg12190322	-0.002375	cg27279991	-0.0005123	cg07328888	-0.004295	cg26846424	-0.001155	cg06251289	-0.002018	cg01673669	-0.007235	cg10576725	-0.002614	cg04693928	-0.00344	cg18187680	-0.008991	cg02085210	-0.004704	cg01490102	-0.005534	cg23344321	-0.006181	cg21794428	-0.003589	cg19702675	-0.004537
cg12513505	-0.001579	cg20943461	-0.002375	cg02417084	-0.0005121	cg01553946	-0.004289	cg09680447	-0.001154	cg12708336	-0.002017	cg17266282	-0.007227	cg02245794	-0.002613	cg25513173	-0.003439	cg20211816	-0.008987	cg14710552	-0.004703	cg11270042	-0.005534	cg08681519	-0.006175	cg10061361	-0.003588	cg21831898	-0.004537
cg22782986	-0.001579	cg18609783	-0.002374	cg14830371	-0.0005116	cg26505691	-0.004287	cg18043828	-0.001154	cg11528176	-0.002016	cg02971546	-0.007226	cg24793124	-0.002611	cg13269407	-0.003437	cg05670953	-0.00898	cg06679694	-0.004701	cg22349573	-0.005532	cg00117172	-0.006169	cg07753583	-0.003587	cg09386954	-0.004534
cg04641787	-0.001578	cg03630847	-0.002373	cg22055815	-0.0005114	cg15148757	-0.004285	cg21878650	-0.001154	cg06933574	-0.002015	cg07463059	-0.007226	cg02156680	-0.002607	cg16762778	-0.003435	cg11067013	-0.008978	cg10851739	-0.004701	cg14420108	-0.005531	cg05191175	-0.006156	cg26332926	-0.003587	cg26991199	-0.004534
cg18343292	-0.001578	cg12448724	-0.002373	cg08420572	-0.0005111	cg08450280	-0.004283	cg24725522	-0.001154	cg10837843	-0.002013	cg13910860	-0.007224	cg19049607	-0.002603	cg00765922	-0.003433	cg13088406	-0.008978	cg23197862	-0.0047	cg22088219	-0.005531	cg07431286	-0.006151	cg13889934	-0.003586	cg06230736	-0.004526
cg17163527	-0.001577	cg04138112	-0.002372	cg22349573	-0.0005111	cg16553182	-0.004283	cg25456477	-0.001153	cg16412956	-0.002008	cg08369079	-0.007222	cg23252902	-0.002603	cg21151432	-0.003431	cg27234864	-0.008965	cg11745019	-0.004699	cg23954922	-0.005524	cg26760589	-0.006147	cg14859854	-0.003586	cg07365816	-0.004524
cg19229344	-0.001577	cg04922566	-0.002371	cg01750375	-0.0005108	cg10213328	-0.004282	cg01312858	-0.001152	cg19291576	-0.002008	cg27138204	-0.007222	cg25883083	-0.002603	cg19622662	-0.003426	cg08521684	-0.008964	cg05810170	-0.004697	cg05582311	-0.005518	cg04313875	-0.006144	cg07217350	-0.003585	cg14830371	-0.004524
cg08746900	-0.001576	cg12002589	-0.002371	cg18664369	-0.0005108	cg08217124	-0.004281	cg06508783	-0.001152	cg16855845	-0.002006	cg05038268	-0.007215	cg23833896	-0.002601	cg15375239	-0.003425	cg20129717	-0.008963	cg05418487	-0.004696	cg00083262	-0.005509	cg04745805	-0.006144	cg06869532	-0.003574	cg01612057	-0.00452
cg00977110	-0.001574	cg20123891	-0.002371	cg24081819	-0.0005104	cg16997732	-0.004279	cg12245996	-0.001152	cg26607828	-0.002006	cg06835628	-0.007215	cg16488098	-0.002599	cg20555674	-0.003425	cg02097309	-0.008962	cg00262446	-0.004695	cg00041328	-0.005507	cg07056567	-0.006134	cg11936643	-0.003574	ch.X.881064F	-0.004517
cg03251054	-0.001572	cg05654008	-0.00237	cg12038696	-0.00051	cg25720793	-0.004279	cg16142707	-0.001151	cg05330668	-0.002005	cg12158737	-0.007211	cg04009887	-0.002598	cg08110488	-0.003421	cg00409917	-0.008959	cg12093371	-0.004683	cg23054321	-0.005504	cg27563952	-0.006131	cg07347092	-0.003568	cg21739658	-0.004515
cg20885179	-0.001572	cg09930033	-0.00237	cg03306024	-0.0005099	cg04476414	-0.004278	cg20869673	-0.001151	cg26653360	-0.002005	cg24348240	-0.00721	cg17820591	-0.002598	cg16412956	-0.00342	cg12624829	-0.008959	cg12427321	-0.00468	cg04056179	-0.005502	cg14607407	-0.006124	cg15124109	-0.003567	cg07423363	-0.004513
cg23595222	-0.001571	cg10576280	-0.00237	cg02527112	-0.0005096	cg16585827	-0.004274	cg26487948	-0.001151	cg02097309	-0.002004	cg20108908	-0.007209	cg19753794	-0.002598	cg23833896	-0.00342	cg00531750	-0.008955	cg07046575	-0.004679	cg17956079	-0.005502	cg14125468	-0.00612	cg24419324	-0.003567	cg02214414	-0.004509
cg05762694	-0.00157	cg14248188	-0.00237	cg00049440	-0.0005095	cg14166485	-0.004267	cg01492656	-0.00115	cg13719443	-0.002002	cg19868593	-0.007207	cg01020263	-0.002597	cg24377329	-0.00342	cg26653360	-0.008953	cg19037922	-0.004675	cg18531146	-0.005501	cg17174775	-0.00612	cg06134410	-0.003566	cg16810293	-0.004506
cg06770163	-0.001568	cg07144296	-0.002367	cg11018337	-0.0005092	cg10946669	-0.004266	cg04009887	-0.001148	cg15668468	-0.002001	cg16762778	-0.007204	cg07443287	-0.002596	cg07139440	-0.003416	ch.X.1639000R	-0.00894	cg14822966	-0.004672	cg21204020	-0.005501	cg01269795	-0.006115	cg17601658	-0.003564	cg19190728	-0.004498
cg00286853	-0.001566	cg25016544	-0.002366	cg24700485	-0.000509	cg16651780	-0.004264	cg13806870	-0.001148	cg09672358	-0.001997	cg17586256	-0.007198	cg25890168	-0.002595	cg12384572	-0.003408	cg05867154	-0.008932	cg05060949	-0.004667	cg25851152	-0.005497	cg09845785	-0.006113	cg21487261	-0.003564	cg25541958	-0.004498
cg05026135	-0.001566	cg04424443	-0.002364	cg02642123	-0.0005086	cg08231348	-0.004258	cg02606808	-0.001146	cg07652350	-0.001995	cg05673882	-0.007196	cg00759699	-0.002594	cg02998620	-0.003407	ch.X.747556F	-0.008925	cg01775044	-0.004662	cg02407720	-0.005494	ch.X.1639000R	-0.006111	cg17463149	-0.003563	cg26127778	-0.004498
cg15556943	-0.001565	cg26246127	-0.002363	cg02481642	-0.0005083	cg01899253	-0.004251	cg15564240	-0.001146	cg14351425	-0.001994	cg01361499	-0.007194	cg23470850	-0.002592	cg00825173	-0.003405	cg08551615	-0.008919	cg03315007	-0.004661	cg07067241	-0.005486	cg17463149	-0.006109	cg00051483	-0.003562	cg09355771	-0.004496
cg18101249	-0.001565	cg23563008	-0.002362	cg18891712	-0.0005081	cg02334722	-0.004251	cg18187680	-0.001146	cg23786580	-0.001992	cg25694349	-0.007194	cg00828689	-0.002591	cg02194789	-0.003405	cg07647825	-0.008911	cg16468729	-0.004661	cg23795217	-0.005485	cg14755831	-0.006105	cg17373656	-0.00356	cg25202070	-0.004496
cg18891712	-0.001565	cg05616999	-0.00236	cg09297288	-0.0005076	cg26685941	-0.004251	cg07077694	-0.001145	cg25969107	-0.001992	cg03196720	-0.007193	cg12024828	-0.002589	cg15090202	-0.003405	cg04480386	-0.00891	cg25458520	-0.004658	cg13530621	-0.005482	cg07753583	-0.006099	cg18748525	-0.003559	cg21757368	-0.004495
cg20459111	-0.001565	cg15802555	-0.002357	cg14119437	-0.0005075	cg06422883	-0.004249	cg05974816	-0.001144	cg03993743	-0.001991	cg20943461	-0.00719	cg16957313	-0.002589	cg27188703	-0.003404	cg08178441	-0.008908	cg01116067	-0.004655	cg13014531	-0.005481	cg13273789	-0.006098	cg27353361	-0.003559	cg00401091	-0.004494
cg25339566	-0.001565	cg04852443	-0.002356	cg10765877	-0.0005074	cg20383155	-0.004246	cg09591072	-0.001144	cg18389933	-0.001991	cg16817070	-0.007189	cg04134048	-0.002588	cg09366620	-0.003403	cg23795217	-0.008908	cg03123370	-0.004653	cg23919433	-0.00548	cg00106685	-0.006091	cg17210604	-0.003558	cg04148584	-0.004494
cg08573893	-0.001564	cg07652350	-0.002355	cg14689537	-0.0005072	cg04521957	-0.004245	cg27458485	-0.001144	cg11983576	-0.001988	cg03172801	-0.007187	cg10098021	-0.002586	cg04464940	-0.003402	cg00573330	-0.008901	cg08608836	-0.004652	cg13797825	-0.005476	cg13207733	-0.006087	cg01768201	-0.003557	cg18064474	-0.004494
cg06162038	-0.001563	cg05822532	-0.002354	cg04123409	-0.0005071	cg20824867	-0.004245	cg01080924	-0.001142	cg22958957	-0.001987	cg17661462	-0.007182	cg16801374	-0.002583	cg01591431	-0.003401	cg02466588	-0.008901	cg06929846	-0.004649	cg06882298	-0.005475	cg06511389	-0.006081	cg20824867	-0.003557	cg07582470	-0.004492
cg25969122	-0.001563	cg09132264	-0.002354	cg05042743	-0.000507	cg21809007	-0.004244	cg08170757	-0.001141	cg25776467	-0.001986	cg00483562	-0.007175	cg06861572	-0.002582	cg13015908	-0.003399	cg25737323	-0.008897	cg16573542	-0.004646	cg14182566	-0.005475	cg11900861	-0.006078	cg24700663	-0.003557	cg08122140	-0.004492
cg01533108	-0.001562	cg17886678	-0.002354	cg11672037	-0.000507	cg24828253	-0.004244	cg14162086	-0.001141	cg09355771	-0.001985	cg06478823	-0.007161	cg09258479	-0.002578	cg26127778	-0.003397	cg26650655	-0.008896	cg11634496	-0.004645	cg26140475	-0.005475	cg05650680	-0.00607	cg14572967	-0.003555	cg13957558	-0.004492
cg04576672	-0.001562	cg22460123	-0.002353	cg24437715	-0.0005069	cg09467501	-0.004242	cg09017941	-0.00114	cg10682803	-0.001985	cg13919466	-0.007155	cg02971546	-0.002577	cg01673669	-0.003395	cg02396676	-0.008889	cg18258224	-0.004644	cg02545261	-0.005471	cg13482308	-0.006067	cg13209822	-0.003554	cg17775621	-0.004492
cg07255019	-0.001561	cg09696121	-0.002352	cg01901107	-0.0005065	cg23165899	-0.004242	cg16072192	-0.00114	cg06114334	-0.001982	cg24384244	-0.007151	cg02553516	-0.002576	cg20405584	-0.003394	cg21238414	-0.008857	cg02652260	-0.004639	cg13707951	-0.005469	cg10112391	-0.006063	cg22081371	-0.003554	cg02300584	-0.004491
cg01751134	-0.00156	cg00733005	-0.00235	cg04301104	-0.0005062	cg04100595	-0.004237	cg26437123	-0.00114	cg22729726	-0.00198	cg06447552	-0.007149	cg23254047	-0.002576	cg09429735	-0.003393	cg13273789	-0.008854	cg12145080	-0.004639	cg05030574	-0.005465	cg03025135	-0.006059	cg07890490	-0.003552	cg02466588	-0.00449
cg05742308	-0.00156	cg25285090	-0.002347	cg26653360	-0.0005062	cg15747933	-0.004235	cg04160501	-0.001138	cg04100595	-0.001979	cg20117153	-0.007144	cg02334722	-0.002573	cg24631482	-0.003392	cg27116842	-0.008839	cg25737323	-0.004639	cg09680447	-0.005465	cg21359747	-0.006057	cg08608836	-0.003551	cg18148130	-0.00449
cg08284213	-0.00156	cg11861709	-0.002346	cg05314679	-0.000506	cg13071476	-0.004234	cg08138685	-0.001138	cg16488098	-0.001977	cg24181771	-0.007142	cg17801546	-0.002573	cg07458308	-0.003391	cg03802201	-0.008837	cg03688058	-0.004637	cg16761581	-0.005465	cg05726195	-0.00605	cg04791477	-0.00355	cg00977110	-0.004486
cg01336821	-0.001559	cg10753610	-0.002345	cg09679923	-0.0005059	ch.X.68408155R	-0.004233	cg09845785	-0.001138	cg05762694	-0.001976	cg15153383	-0.00714	cg10253929	-0.002571	cg08662757	-0.003388	cg09930017	-0.008837	cg23054321	-0.004636	cg07158808	-0.005464	cg18892169	-0.006048	cg17083506	-0.00355	cg19673012	-0.004484
cg06409432	-0.001559	cg10951873	-0.002345	cg10673740	-0.0005055	cg25183082	-0.004232	cg14293864	-0.001136	cg12036735	-0.001976	cg16754364	-0.007136	cg15786837	-0.002569	cg21701395	-0.003388	cg07531860	-0.008834	cg00325866	-0.004635	cg07859439	-0.005464	cg27499820	-0.006046	cg22306928	-0.003549	cg21107924	-0.004481
cg18531146	-0.001559	cg14597214	-0.002345	cg05635730	-0.0005053	ch.X.108369489R	-0.004232	cg00665374	-0.001135	cg16761581	-0.001976	cg04742550	-0.007134	cg07076509	-0.002568	cg19634213	-0.003386	cg11291081	-0.008828	cg00343092	-0.004633	cg21836903	-0.005462	cg03935432	-0.006041	cg01721754	-0.003548	cg04908588	-0.00448
cg05191175	-0.001558	cg16249105	-0.002345	cg08441931	-0.000505	cg03196720	-0.00423	cg23220551	-0.001135	cg19578388	-0.001975	cg11082691	-0.007128	cg19102771	-0.002564	cg11029634	-0.003385	cg01899130	-0.008822	cg12739584	-0.004629	cg19576806	-0.00545	cg23415756	-0.006041	cg06508783	-0.003548	cg15626828	-0.004478
cg13373589	-0.001558	cg17003260	-0.002345	cg14084091	-0.0005043	cg03843031	-0.004229	cg11672037	-0.001134	cg05490659	-0.001971	cg23874561	-0.007128	cg07905444	-0.002562	cg11498607	-0.003385	cg23252902	-0.008817	cg27234864	-0.004626	cg24333845	-0.005447	cg25439632	-0.006037	cg18043828	-0.003547	cg10753610	-0.004474
cg02062409	-0.001556	cg06540146	-0.002344	cg18781240	-0.0005043	cg10253929	-0.004225	cg04628008	-0.001133	cg18097224	-0.00197	cg07216425	-0.007127	cg10851739	-0.002562	cg08879559	-0.003384	cg11728578	-0.008815	cg24101049	-0.004622	cg02289189	-0.005445	cg09750775	-0.006028	cg22885965	-0.003546	cg12405258	-0.004472
cg15718833	-0.001556	cg20222376	-0.002344	cg20979153	-0.0005037	cg14283783	-0.004225	cg07531860	-0.001133	cg11467638	-0.001969	cg04635642	-0.007124	cg20555674	-0.00256	cg12610867	-0.003384	cg00282704	-0.008813	cg02545261	-0.004621	cg20117153	-0.005445	cg16453560	-0.006022	cg16721977	-0.003545	cg08304120	-0.004471
cg25208017	-0.001556	cg05060949	-0.002343	cg11936643	-0.0005035	cg16296290	-0.004225	cg08284213	-0.001132	cg11879741	-0.001969	cg19597031	-0.007123	cg23919433	-0.002558	cg24368167	-0.003382	cg22832061	-0.008812	cg22606224	-0.00462	ch.X.68408155R	-0.005442	cg05221664	-0.006016	cg00782174	-0.003543	cg08533745	-0.004471
cg12563178	-0.001555	cg19311889	-0.002343	cg23691090	-0.0005033	cg17689206	-0.004223	cg07431229	-0.00113	cg08676425	-0.001968	cg15996480	-0.007121	cg07654569	-0.002557	cg00232402	-0.00338	cg26561413	-0.008808	cg21919136	-0.004617	cg03085712	-0.005439	cg21287936	-0.006012	cg23174932	-0.003543	cg10040922	-0.004471
cg19871940	-0.001555	cg17163527	-0.00234	cg18363192	-0.0005031	cg04829186	-0.004221	cg13600477	-0.00113	cg13537353	-0.001967	cg02998620	-0.007119	cg02716635	-0.002553	cg20059012	-0.003379	cg09056501	-0.008807	cg00448761	-0.004614	cg00222995	-0.005431	cg22434226	-0.006007	cg07282058	-0.003539	cg21662807	-0.00447
cg07778029	-0.001554	cg10377245	-0.002339	cg07161172	-0.0005028	cg14567593	-0.004221	cg27563048	-0.00113	ch.X.153018199F	-0.001967	cg06731639	-0.007119	cg27138204	-0.00255	cg17186727	-0.003377	cg10245915	-0.008796	cg00397479	-0.004613	cg00107603	-0.005427	cg27139956	-0.006	cg17997279	-0.003537	cg21881074	-0.004469
ch.X.2195099F	-0.001554	cg15247269	-0.002336	cg15996480	-0.0005025	cg02928476	-0.00422	cg13453904	-0.001129	cg01381636	-0.001964	cg11731221	-0.007117	cg03935432	-0.002549	cg08578245	-0.003376	cg27141898	-0.008788	cg23595222	-0.004612	cg16695389	-0.005426	cg06107816	-0.005994	cg27495769	-0.003531	cg12036735	-0.004468
cg25751371	-0.001553	cg20941820	-0.002336	cg11785652	-0.0005024	cg07976064	-0.004219	cg14002345	-0.001129	cg27189973	-0.001964	cg09366620	-0.007115	cg03030717	-0.002547	cg00512404	-0.003372	cg04917511	-0.008785	cg10061342	-0.004611	cg21739530	-0.005423	cg24671939	-0.005991	cg27086308	-0.003528	cg14675361	-0.004467
cg02245794	-0.00155	cg16855845	-0.002334	cg16417447	-0.0005015	cg13564825	-0.004217	cg24098643	-0.001129	cg08349497	-0.001962	cg14344261	-0.007111	cg06952752	-0.002546	cg17538280	-0.003372	cg10098888	-0.008783	cg10328157	-0.004611	cg09043127	-0.005422	cg03623982	-0.00599	cg21210224	-0.003526	cg00275449	-0.00446
cg24529484	-0.00155	cg14950169	-0.002333	cg19433091	-0.0005014	cg08669259	-0.004216	cg01202265	-0.001128	cg08424184	-0.001962	cg25016544	-0.007105	cg00498591	-0.002543	cg02344943	-0.00337	cg24531915	-0.008776	cg15668468	-0.004609	cg20211816	-0.005421	cg11509269	-0.005989	cg06060137	-0.003524	cg03719128	-0.00446
cg16801374	-0.001548	cg02948624	-0.002332	cg06246224	-0.0005008	cg25163851	-0.004216	cg06685968	-0.001128	cg09763162	-0.001962	cg27035251	-0.007096	cg04845871	-0.002542	cg00218447	-0.003369	cg26437123	-0.008773	cg10017888	-0.004605	cg18214661	-0.005419	cg03741862	-0.005987	cg05951576	-0.003523	cg15734764	-0.004454
cg14219290	-0.001546	cg03638795	-0.002332	cg24267283	-0.0005007	cg08745498	-0.004214	cg14841828	-0.001128	cg05645404	-0.001961	cg08130179	-0.007094	cg12224508	-0.002542	cg26301565	-0.003369	cg24935042	-0.00877	cg02680341	-0.004604	cg25673948	-0.005418	cg15013019	-0.005985	cg04502814	-0.003522	cg13575161	-0.004453
cg23244022	-0.001545	cg07245225	-0.002332	cg25016544	-0.0005006	ch.X.382657R	-0.004214	cg18693345	-0.001128	cg15729404	-0.00196	cg11203397	-0.00709	cg18261069	-0.00254	cg08811314	-0.003365	cg08662757	-0.008752	cg14060111	-0.004602	cg08774969	-0.005409	cg24419324	-0.005982	cg17419241	-0.003522	cg26653360	-0.00445
cg15089487	-0.001544	cg07470207	-0.002332	cg20173059	-0.0005001	cg06022942	-0.004211	cg24700485	-0.001128	cg24081819	-0.001959	cg18709545	-0.00709	cg00765922	-0.002539	cg08314021	-0.003363	cg25666919	-0.008747	cg18709545	-0.0046	cg12373084	-0.005409	cg24843443	-0.005982	cg02627991	-0.003521	cg03025135	-0.004448
cg26906217	-0.001543	cg10013716	-0.002332	cg26201952	-0.0005	cg15184687	-0.00421	cg05645404	-0.001127	cg24932686	-0.001959	cg02172652	-0.007087	cg03143164	-0.002539	cg14258341	-0.003359	cg03227078	-0.00874	cg00606464	-0.004598	cg01234063	-0.005406	cg13957558	-0.005981	cg21739530	-0.00352	cg07217350	-0.004447
cg07039423	-0.001541	cg19697530	-0.002332	cg17838026	-0.0004994	cg06119711	-0.004209	cg16202564	-0.001126	cg07161369	-0.001957	cg08321576	-0.007083	cg25812424	-0.002537	cg22827124	-0.003358	cg15847989	-0.008737	cg18571112	-0.004593	cg16958524	-0.005402	cg08712824	-0.00598	cg24081819	-0.00352	cg16561266	-0.004447
cg07693238	-0.00154	cg16910830	-0.002331	cg00785738	-0.0004992	cg19998675	-0.004206	cg18943693	-0.001125	cg19787727	-0.001957	ch.X.2195099F	-0.007083	cg26530485	-0.002537	cg23261107	-0.003357	cg24757310	-0.008737	cg06422883	-0.004591	cg07592723	-0.005395	cg12594569	-0.005978	cg12206423	-0.003516	cg17465631	-0.004446
cg03191045	-0.001539	cg04134048	-0.002329	cg19046725	-0.0004991	cg22256631	-0.004205	cg22832061	-0.001125	cg00362657	-0.001956	cg14539393	-0.007074	cg26478401	-0.002535	cg19570545	-0.003356	cg27429749	-0.008734	cg22334880	-0.004591	cg06779672	-0.005392	cg02964396	-0.005976	cg23032936	-0.003512	cg16199881	-0.004445
cg21222743	-0.001539	cg27326452	-0.002327	cg23878241	-0.000499	cg06654905	-0.004204	cg04346113	-0.001124	cg12934574	-0.001956	cg22285621	-0.007073	cg10695848	-0.002532	cg27315170	-0.003355	cg11424456	-0.008731	cg23442621	-0.004591	cg21701395	-0.005388	cg04276084	-0.005976	cg20342628	-0.003508	cg00577865	-0.004441
cg24059154	-0.001539	cg13703049	-0.002326	cg16962970	-0.0004989	cg11997733	-0.004204	cg05103387	-0.001124	cg01282174	-0.001955	cg10626816	-0.00707	cg27624424	-0.002527	cg08774969	-0.00335	cg22478210	-0.008725	cg11424456	-0.004589	cg05449136	-0.005385	ch.X.938089F	-0.005976	cg20383155	-0.003505	cg01612366	-0.00444
cg26762347	-0.001539	cg16703576	-0.002326	cg08304120	-0.0004986	cg18399703	-0.004201	cg11831003	-0.001124	cg15424250	-0.001955	cg20917083	-0.007068	cg10896862	-0.002526	cg20330472	-0.003348	cg21481775	-0.008723	cg19828516	-0.004587	cg15147435	-0.005385	cg16223546	-0.005974	cg25146017	-0.003505	cg04279588	-0.00444
cg02271790	-0.001537	cg10838789	-0.002325	cg12600174	-0.0004985	cg11203397	-0.004198	cg22410026	-0.001124	cg27409484	-0.001955	cg01063813	-0.007064	cg12706425	-0.002525	cg17441401	-0.003345	cg10633838	-0.008712	cg00495036	-0.004583	cg04301104	-0.005382	cg02205181	-0.005968	cg04982951	-0.003504	cg12259256	-0.00444
cg03584113	-0.001537	cg22256631	-0.002325	cg12394300	-0.0004984	cg23928165	-0.004197	ch.X.23343928R	-0.001124	cg13209122	-0.001954	cg19176391	-0.007063	cg08799922	-0.002524	cg08251901	-0.003342	cg06822689	-0.008707	cg01797371	-0.004581	cg10905180	-0.005382	cg12177220	-0.005968	cg00446414	-0.003499	cg04895321	-0.004436
cg18709545	-0.001534	cg14305711	-0.002324	cg12439977	-0.0004983	cg03128635	-0.004191	cg08349497	-0.001123	cg22460123	-0.001953	cg05490659	-0.007061	cg12713583	-0.002521	cg01094748	-0.003338	cg10098021	-0.008702	cg15488194	-0.004576	cg19924948	-0.005379	cg26472118	-0.005968	cg10838664	-0.003499	ch.X.153018199F	-0.004433
cg07470207	-0.001533	cg14400292	-0.002324	cg15556943	-0.0004983	cg11879741	-0.00419	cg27004414	-0.001123	cg07463059	-0.001951	cg05080281	-0.007053	cg14597214	-0.002521	cg14415616	-0.003336	cg18664369	-0.008697	cg24419324	-0.004576	cg14675361	-0.005376	cg21011133	-0.005966	cg05908079	-0.003497	cg03030717	-0.004432
cg10253929	-0.001533	cg16034881	-0.002324	cg18233746	-0.0004979	cg23359810	-0.004187	cg05418487	-0.001122	cg16417447	-0.001951	cg07471461	-0.007051	cg06740227	-0.002517	cg16393012	-0.003336	cg15375239	-0.008691	cg05026135	-0.004575	cg11805450	-0.005375	cg08905629	-0.005965	cg08621846	-0.003496	cg02380334	-0.004428
cg11185792	-0.001533	cg18241829	-0.002324	cg16356456	-0.0004978	cg19121473	-0.004185	cg06861572	-0.001122	cg27627209	-0.001951	cg17552333	-0.007051	ch.X.87262228F	-0.002517	cg23907053	-0.003336	cg27634695	-0.008691	cg02497700	-0.004563	cg12855166	-0.00537	cg05683227	-0.005964	cg00325866	-0.003492	cg03359503	-0.004427
cg02119091	-0.001532	cg00662647	-0.002321	cg10942903	-0.0004977	cg09316894	-0.004183	cg15375239	-0.001122	cg13847066	-0.00195	cg24349631	-0.007047	cg04525491	-0.002516	cg12155676	-0.003335	cg09357438	-0.008688	cg20383155	-0.004562	cg20721917	-0.005358	cg25124966	-0.005961	cg06321883	-0.003492	cg11664467	-0.004424
cg14002345	-0.001532	cg09415272	-0.002321	cg27140247	-0.000497	cg27347290	-0.004179	cg06230948	-0.001121	cg14572967	-0.001949	cg07190763	-0.007044	cg18109838	-0.002515	cg14888916	-0.003334	cg09222023	-0.008686	cg26069719	-0.004558	cg12739584	-0.005355	cg12526298	-0.00596	cg19037922	-0.003491	cg03854765	-0.004419
cg23478293	-0.001532	cg03254465	-0.00232	cg08424184	-0.0004968	cg01141940	-0.004177	cg07325233	-0.001121	cg16470319	-0.001949	cg06341590	-0.007043	cg11935153	-0.002514	cg21920775	-0.003334	cg04233717	-0.008683	cg04276084	-0.004556	cg08430222	-0.005353	cg15996480	-0.005958	cg00106685	-0.003489	cg13847066	-0.004413
cg27127903	-0.001531	cg22517836	-0.00232	cg15394142	-0.0004967	cg13686615	-0.004176	cg14689537	-0.001121	cg03167413	-0.001946	cg19985056	-0.007043	cg15184687	-0.002512	cg06197769	-0.003331	cg17572800	-0.008676	cg23085343	-0.004554	cg05867154	-0.00535	cg17688837	-0.005951	cg10091994	-0.003488	cg07664480	-0.004411
cg27427514	-0.001531	cg09135016	-0.002318	cg01282174	-0.0004963	cg11509269	-0.004174	cg07045891	-0.00112	cg10099799	-0.001946	cg19157329	-0.00704	cg04824711	-0.002511	cg25287257	-0.003331	cg14714537	-0.008673	cg26089160	-0.004553	cg11225410	-0.00535	cg15174823	-0.005946	cg08110488	-0.003487	cg11387340	-0.004409
cg00091483	-0.00153	cg22381454	-0.002318	cg00733005	-0.0004959	cg02156712	-0.004173	cg21413754	-0.00112	cg11382477	-0.001945	cg12391352	-0.007038	cg04890576	-0.002511	cg25282285	-0.00333	cg00041328	-0.008672	cg26487031	-0.004548	cg24652679	-0.005348	cg16489610	-0.005945	cg22017733	-0.003487	ch.X.1023208F	-0.004409
cg03094193	-0.00153	cg11890741	-0.002317	cg04026492	-0.0004959	cg07469594	-0.004169	cg22220165	-0.00112	cg05694021	-0.001944	cg05460582	-0.007034	cg16624272	-0.002511	cg20972214	-0.003329	cg15391601	-0.008665	cg02567488	-0.004547	cg09056501	-0.005346	cg24133569	-0.005944	cg10165071	-0.003485	cg17900495	-0.004407
cg16104915	-0.00153	cg02236650	-0.002316	cg09463047	-0.0004958	cg07282058	-0.004168	cg09143195	-0.001118	cg11402586	-0.001943	cg11194994	-0.007033	cg27533237	-0.002508	cg25524962	-0.003327	cg26022183	-0.00866	cg10502118	-0.004545	cg14034852	-0.005343	cg10166205	-0.005941	cg10870083	-0.003485	cg03276956	-0.0044
cg07245225	-0.001529	cg23967554	-0.002316	cg15668468	-0.0004958	cg08325519	-0.004166	cg17406148	-0.001118	cg21597595	-0.001942	cg18441811	-0.007033	cg01894048	-0.002507	cg23725454	-0.003325	cg04518912	-0.008655	cg03182958	-0.004544	cg02294764	-0.005341	cg23683528	-0.005941	cg00448761	-0.003483	cg06652329	-0.004396
cg20328396	-0.001529	cg10099799	-0.002314	cg20585088	-0.0004958	cg14274482	-0.004166	cg08828594	-0.001117	cg26672071	-0.001941	cg15488194	-0.007029	cg22790973	-0.002506	cg16655905	-0.003321	cg10985914	-0.008654	cg08244848	-0.004544	cg07753583	-0.005338	cg18187680	-0.00594	cg12840248	-0.003483	cg24689196	-0.004396
cg06829366	-0.001526	cg12681001	-0.002314	cg06633429	-0.0004957	cg14689537	-0.004165	cg11299991	-0.001116	cg19422030	-0.00194	cg26478401	-0.00702	cg00051483	-0.002505	cg23588086	-0.003321	cg11042361	-0.00865	cg15069926	-0.004544	cg07616394	-0.005337	cg23691090	-0.005937	cg09809276	-0.003482	cg27101125	-0.004393
cg10457563	-0.001526	cg23201549	-0.002314	cg18241829	-0.0004957	cg14527333	-0.004164	cg21968580	-0.001116	cg06752695	-0.001939	cg15394142	-0.007019	cg11194994	-0.002505	cg12093371	-0.00332	cg10576725	-0.008648	cg06162038	-0.004541	cg13629753	-0.005335	cg14879153	-0.005929	cg10825398	-0.003482	cg12224508	-0.004391
cg20691722	-0.001526	cg25157280	-0.002314	cg06654905	-0.0004956	cg27409484	-0.004161	cg26653360	-0.001116	cg18665871	-0.001939	cg05645404	-0.007018	cg15219347	-0.002504	cg03217795	-0.003319	cg01342196	-0.008645	cg09655782	-0.004539	cg15784124	-0.005332	cg25541958	-0.005926	cg14131272	-0.003481	cg18302786	-0.004388
cg14497673	-0.001525	cg00165888	-0.002313	cg20481909	-0.0004951	cg06413398	-0.004158	ch.X.92448175R	-0.001116	cg18240463	-0.001938	cg06861572	-0.007018	cg10682803	-0.002502	cg00397479	-0.003314	cg16142707	-0.008645	cg09777344	-0.004539	cg17618595	-0.005331	ch.X.256253R	-0.00592	cg00488512	-0.00348	cg14059221	-0.004385
cg22377643	-0.001525	cg14415816	-0.002312	cg01657408	-0.000495	cg06740227	-0.004155	cg14166485	-0.001115	cg23470850	-0.001938	cg25586410	-0.007016	cg15650509	-0.002497	cg02552250	-0.003314	cg10695848	-0.00864	cg04348419	-0.004532	cg09809276	-0.005326	ch.X.703923F	-0.005919	cg20681068	-0.003478	cg07941983	-0.00438
cg15162392	-0.001522	cg23954787	-0.002311	cg14710552	-0.0004947	cg09504322	-0.004154	cg01491219	-0.001114	cg18022012	-0.001937	cg13498289	-0.007013	cg17491987	-0.002496	cg15219347	-0.003314	cg11451801	-0.008631	cg06652329	-0.004526	cg02877538	-0.00532	cg04174211	-0.005912	cg11314042	-0.003477	cg04204967	-0.004379
cg16983211	-0.001522	cg24319902	-0.002309	cg15769764	-0.0004947	cg22992815	-0.004154	cg15043720	-0.001113	cg00450784	-0.001935	cg05670953	-0.007007	cg19422030	-0.002494	cg06029700	-0.003311	cg08712824	-0.008623	cg18399703	-0.004526	cg04329105	-0.00532	cg14515424	-0.005912	cg06679694	-0.003469	cg18617679	-0.004379
cg06511389	-0.00152	cg02538199	-0.002308	cg02856132	-0.0004941	cg06218124	-0.004153	cg04175895	-0.001112	cg03217795	-0.001935	cg14425468	-0.007001	cg24480012	-0.002494	cg01597066	-0.00331	cg07141055	-0.008616	cg24610274	-0.00452	cg24348240	-0.00532	cg15417798	-0.00591	cg08154437	-0.003469	cg19323951	-0.004375
cg18110444	-0.00152	cg08573893	-0.002307	cg13422850	-0.000494	cg06348038	-0.004152	cg14317609	-0.001112	cg19301897	-0.001934	cg01103911	-0.006996	cg12868173	-0.002492	cg17861863	-0.00331	cg16339264	-0.008606	cg03306024	-0.004518	cg15853117	-0.005319	cg04964062	-0.005907	cg12587766	-0.003464	cg15079315	-0.004374
cg02397720	-0.001519	cg09328349	-0.002307	cg16199277	-0.0004938	cg14048834	-0.004152	cg06974755	-0.001111	cg21878650	-0.001933	cg23787321	-0.006996	cg17468773	-0.002492	cg26170244	-0.003308	cg25694349	-0.008601	cg11067013	-0.004517	cg01511742	-0.005317	cg14539393	-0.005906	cg25746764	-0.003461	cg13767001	-0.004373
cg15079315	-0.001519	cg25812424	-0.002306	cg09268729	-0.0004934	cg24567694	-0.004152	cg27409484	-0.001111	cg06487301	-0.001931	cg23739746	-0.006992	cg16817070	-0.00249	cg06940792	-0.003306	cg12996903	-0.008598	cg13889934	-0.004517	cg07141055	-0.005317	cg24035962	-0.005906	cg17353698	-0.003459	cg09669930	-0.004369
cg19446018	-0.001519	cg19502867	-0.002305	cg05490659	-0.0004933	cg25410785	-0.004152	cg02020296	-0.001109	cg11121623	-0.001931	cg18188010	-0.006991	cg13269407	-0.002489	cg16488098	-0.0033	cg15716680	-0.008594	cg17353698	-0.004517	cg15459780	-0.005316	cg06740227	-0.005903	cg05437446	-0.003458	cg06321883	-0.004367
cg27277532	-0.001519	cg14598950	-0.002304	cg04576672	-0.0004932	cg03245734	-0.004147	cg23261107	-0.001109	cg16199277	-0.001931	cg09192572	-0.00699	cg12391352	-0.002486	cg24407308	-0.003299	cg13269407	-0.008593	cg26991199	-0.004517	cg16573542	-0.005305	cg26632909	-0.005903	cg07382943	-0.003457	cg12390895	-0.004367
cg14305711	-0.001518	cg01361499	-0.002303	cg25851152	-0.0004932	cg11696475	-0.004145	cg00948275	-0.001108	cg20824867	-0.00193	cg08035234	-0.006986	cg24862483	-0.002485	cg02958634	-0.003298	cg18301048	-0.008592	cg00619470	-0.004516	cg19049607	-0.005304	cg00678236	-0.005901	cg24770596	-0.003455	cg18855080	-0.004362
cg19111999	-0.001518	cg07654569	-0.002303	cg10536999	-0.0004931	cg24269434	-0.004145	cg00977110	-0.001108	cg17891011	-0.001929	cg09805405	-0.006986	cg00275449	-0.002484	cg08194009	-0.003297	cg10129408	-0.008591	ch.X.112118442F	-0.004515	cg13071476	-0.005302	cg17274953	-0.005901	cg09285095	-0.003452	cg18439358	-0.00436
cg27091643	-0.001518	cg09568355	-0.002303	cg27072012	-0.0004931	cg02716635	-0.004144	cg05026135	-0.001108	ch.X.1639000R	-0.001929	cg09994323	-0.006985	cg01966966	-0.002484	cg07282058	-0.003295	cg06230948	-0.00859	cg03848675	-0.004513	cg13475583	-0.0053	cg22783363	-0.005899	cg17540624	-0.003449	cg11765288	-0.004358
cg09284066	-0.001517	cg10946669	-0.002303	cg09012544	-0.000493	cg03802201	-0.004144	cg20879085	-0.001108	cg04820200	-0.001926	cg05608844	-0.006983	ch.X.23343928R	-0.002483	cg11767181	-0.003295	cg21881074	-0.008589	cg10293422	-0.004513	cg26827987	-0.005299	cg19672993	-0.005895	cg27626141	-0.003449	cg04593780	-0.00435
cg26934243	-0.001517	cg02119091	-0.002302	cg18228456	-0.0004929	cg11189251	-0.004144	cg26796190	-0.001108	cg16411883	-0.001925	cg16547579	-0.006982	cg04160501	-0.002481	cg25812424	-0.003292	cg06732666	-0.008588	cg23795217	-0.004507	cg17104258	-0.00529	cg00275449	-0.005891	cg22956254	-0.003446	cg11033617	-0.004349
cg05867154	-0.001516	cg07866131	-0.002301	cg18447772	-0.0004929	cg21684411	-0.004144	cg06713116	-0.001107	cg17851046	-0.001925	cg10400652	-0.006979	cg12373208	-0.002479	cg15450139	-0.003291	cg26127778	-0.008581	cg10112391	-0.004496	cg27429749	-0.005289	cg10508639	-0.005889	cg14442841	-0.003445	cg18598117	-0.004346
cg08286012	-0.001516	cg21586412	-0.002301	cg23787321	-0.0004928	cg15042080	-0.004141	cg09930017	-0.001107	cg25135018	-0.001925	cg16624272	-0.006979	cg10890829	-0.002476	cg00983437	-0.00329	cg13216267	-0.008578	cg10414229	-0.004495	cg06034127	-0.005283	cg00051483	-0.005888	cg21913319	-0.003445	cg21158502	-0.004345
cg08122140	-0.001515	cg22730029	-0.002301	cg18629334	-0.0004924	cg01005968	-0.00414	cg18241829	-0.001106	cg12868173	-0.001924	cg05042743	-0.006977	cg05743713	-0.00247	cg21913319	-0.00329	cg01501009	-0.008576	cg12448724	-0.004491	cg12256688	-0.005283	cg16470319	-0.005886	cg06956048	-0.003444	cg05015635	-0.004344
cg26325335	-0.001515	cg24416513	-0.0023	cg25741023	-0.0004922	cg04221521	-0.004139	cg21999939	-0.001106	cg19316148	-0.001924	cg23833896	-0.006977	cg05747376	-0.00247	cg00362657	-0.003288	cg11393185	-0.008576	cg18043828	-0.00449	cg25124966	-0.005281	cg20117153	-0.005879	cg21357361	-0.003444	cg07995570	-0.004343
cg16529477	-0.001514	cg25092838	-0.0023	cg05611779	-0.0004921	cg07508229	-0.004139	cg05876174	-0.001105	cg04301104	-0.001923	cg23725454	-0.006976	cg12610867	-0.002469	cg17987112	-0.003287	cg13865488	-0.008565	cg24259629	-0.00449	cg03315007	-0.005276	cg01802640	-0.005877	cg13564816	-0.003443	cg22793735	-0.004342
cg17891011	-0.001514	ch.X.938089F	-0.0023	cg10576725	-0.0004914	cg09978533	-0.004139	cg12868173	-0.001105	cg11988036	-0.001923	cg24035962	-0.006975	cg15567428	-0.002469	cg19053239	-0.003287	cg07200280	-0.008564	cg24315421	-0.00449	cg06478823	-0.005273	cg04204967	-0.005876	cg12403778	-0.003442	cg03061352	-0.004341
cg01954531	-0.001513	cg02019574	-0.002299	cg13847066	-0.0004912	cg13442428	-0.004134	cg14579997	-0.001104	cg03484533	-0.001922	cg17980625	-0.006973	cg07971188	-0.002467	cg25568066	-0.003286	cg06774797	-0.008559	cg19576806	-0.004489	cg15768556	-0.005273	cg04089426	-0.005875	cg09276998	-0.003441	cg06817840	-0.004341
cg12681001	-0.001513	cg21803959	-0.002299	cg11997733	-0.0004904	cg19924948	-0.004131	cg19006127	-0.001104	cg12189551	-0.00192	cg10576725	-0.006971	cg22863920	-0.002465	cg08317263	-0.003285	cg13084458	-0.008559	cg20933634	-0.004486	cg23032936	-0.005272	cg17373656	-0.005874	cg08588180	-0.00344	cg26426447	-0.004341
cg20943461	-0.001513	cg09763162	-0.002298	cg14874351	-0.0004903	cg21340148	-0.004131	cg11121623	-0.001103	cg22598028	-0.00192	cg18748525	-0.006971	cg27255678	-0.002464	cg04890576	-0.003283	cg12038696	-0.008558	cg24307440	-0.004486	cg10148280	-0.005271	cg05419671	-0.005873	cg19702675	-0.00344	cg09763162	-0.004338
cg17673897	-0.001512	cg12134570	-0.002297	cg02172857	-0.0004902	cg24374161	-0.004131	cg26201952	-0.001103	cg24488739	-0.00192	cg13269407	-0.006968	cg05822532	-0.002463	cg17423207	-0.003282	cg18441811	-0.008556	cg10587854	-0.004482	cg11536940	-0.00527	cg06476606	-0.005868	cg18701481	-0.003439	cg23174932	-0.004338
cg04837533	-0.001511	cg08662757	-0.002296	cg13453904	-0.0004901	cg07375367	-0.00413	cg12717594	-0.001101	cg11672037	-0.001919	cg07442907	-0.006964	cg17441401	-0.002463	cg27355456	-0.003281	cg24646513	-0.008552	cg00329697	-0.00448	cg15153383	-0.005269	cg24169915	-0.005863	cg18864227	-0.003439	cg12758636	-0.004335
cg01780754	-0.001509	cg01851399	-0.002295	cg05999287	-0.00049	cg16962970	-0.00413	cg15744359	-0.001101	cg16371864	-0.001918	cg10099799	-0.006964	cg24488739	-0.002463	cg16568727	-0.00328	cg18405140	-0.008542	cg04525491	-0.004477	cg23261107	-0.005266	cg06667063	-0.005857	cg22889755	-0.003436	cg02126788	-0.004334
cg14376467	-0.001508	cg07554329	-0.002295	cg09072408	-0.0004899	cg11082691	-0.004128	cg10543450	-0.0011	cg06361238	-0.001917	cg16650292	-0.006963	cg08271804	-0.002461	cg06913958	-0.003279	cg26465214	-0.008533	cg23067085	-0.004477	cg00930890	-0.005264	cg14420108	-0.005857	cg01080924	-0.003435	ch.X.92543860F	-0.004326
cg26685941	-0.001508	cg22377643	-0.002294	cg16547579	-0.0004898	cg09315921	-0.004127	cg24480012	-0.0011	cg14776518	-0.001914	cg25957967	-0.006963	cg00940502	-0.00246	cg26465214	-0.003278	cg18617679	-0.008528	cg26465214	-0.004473	cg18009321	-0.005262	cg13269407	-0.005854	cg26935020	-0.003435	cg09845785	-0.004325
cg23907053	-0.001507	cg27116819	-0.002294	cg24453118	-0.0004898	cg21487261	-0.004126	cg00186414	-0.001099	cg03359183	-0.001913	cg02964396	-0.006955	cg11567001	-0.002457	cg06894687	-0.003277	cg06422883	-0.008527	cg20125569	-0.004472	cg18188010	-0.005262	cg11150901	-0.005851	cg23261107	-0.003434	cg20569588	-0.004325
cg14830371	-0.001506	cg05211768	-0.002292	cg00325866	-0.000489	cg18233746	-0.004125	cg10585371	-0.001099	cg24333845	-0.001913	cg10150686	-0.006947	cg04127825	-0.002456	cg01109135	-0.003276	cg04313875	-0.008526	cg22853371	-0.004472	cg00423729	-0.005261	cg20957095	-0.005851	cg15015034	-0.00343	cg20596640	-0.004322
cg22269486	-0.001506	cg14689537	-0.002292	cg24021113	-0.0004884	cg22550229	-0.004125	cg11380830	-0.001099	ch.X.92435715F	-0.001913	cg06779672	-0.006945	cg08647349	-0.002456	cg12624829	-0.003276	cg03462699	-0.008518	cg06334284	-0.00447	cg06956048	-0.005259	cg15739309	-0.005849	cg21238414	-0.003427	cg26656337	-0.004322
cg22316269	-0.001506	cg01939336	-0.002291	cg15925940	-0.0004881	cg25794153	-0.004124	cg12206423	-0.001099	cg15563450	-0.001912	cg04009887	-0.006944	cg05437446	-0.002455	cg11776014	-0.003275	cg20549620	-0.008516	cg16298760	-0.004468	cg08712824	-0.005254	cg19070088	-0.005848	cg23595222	-0.003427	cg23699916	-0.004317
cg22568403	-0.001505	cg13930596	-0.002288	cg17491987	-0.0004879	cg23564243	-0.004116	cg13483882	-0.001099	cg12038696	-0.00191	cg12436196	-0.006944	cg15832822	-0.002455	cg16938490	-0.003273	cg23137531	-0.008516	cg27626102	-0.004467	cg00488512	-0.005253	cg13348059	-0.005846	cg24843443	-0.003426	cg09326404	-0.004312
cg09781601	-0.001503	cg04822808	-0.002287	cg26342671	-0.0004876	cg15030449	-0.004114	cg21251125	-0.001099	cg20801464	-0.001909	cg20090108	-0.006942	cg05698090	-0.002454	cg02539682	-0.00327	cg13215970	-0.008515	cg11786870	-0.004466	cg24488739	-0.00525	cg01284306	-0.005843	cg04745805	-0.003424	cg24861272	-0.00431
cg23470850	-0.001503	cg02020296	-0.002286	cg20222376	-0.0004872	cg19216198	-0.004114	cg02161478	-0.001098	cg22466217	-0.001908	cg16173191	-0.006937	cg05608844	-0.002452	cg19665644	-0.00327	cg05608844	-0.00851	cg25183082	-0.004463	cg06476606	-0.005249	cg04525491	-0.005843	cg21573047	-0.003424	cg00355909	-0.004308
cg02669807	-0.001502	cg20879085	-0.002286	cg14744768	-0.0004867	cg23535596	-0.004114	cg08026502	-0.001098	cg05769790	-0.001907	cg16356456	-0.006937	cg20943461	-0.002452	cg17510056	-0.003269	cg11162249	-0.00851	cg02397720	-0.004461	cg15703636	-0.005249	cg19724667	-0.005841	cg16291657	-0.003423	cg24631877	-0.004308
cg10239098	-0.001502	cg15607538	-0.002285	cg18191418	-0.0004865	cg02710571	-0.004113	cg11018337	-0.001098	cg08551615	-0.001907	cg21913319	-0.006933	cg03063658	-0.00245	cg00157456	-0.003268	cg08869273	-0.008509	cg07328888	-0.004461	cg02619205	-0.005248	cg08130572	-0.005839	cg10342722	-0.003422	cg08424184	-0.004304
cg15540602	-0.001502	cg07951978	-0.002284	cg07282058	-0.000486	cg00275449	-0.004112	cg25150878	-0.001098	ch.X.147603R	-0.001907	cg15802555	-0.006932	cg08996521	-0.00245	cg25300386	-0.003268	cg19828516	-0.008508	cg12627700	-0.004456	cg06060137	-0.005246	cg15067827	-0.005832	cg11299333	-0.003422	cg27160130	-0.004302
cg20993011	-0.001502	cg18049030	-0.002284	cg22982368	-0.0004849	cg06409432	-0.004111	cg03075709	-0.001097	cg04233717	-0.001906	cg20129717	-0.006932	cg09159285	-0.002448	cg00528640	-0.003267	cg08437570	-0.008506	cg07469594	-0.004454	cg25599475	-0.005239	cg18148130	-0.005831	cg02172652	-0.003415	cg05694021	-0.004299
cg05327835	-0.001499	cg00707452	-0.002283	cg00255142	-0.0004847	cg19116006	-0.004111	cg07811750	-0.001097	cg03143164	-0.001904	cg22112051	-0.006928	cg14344261	-0.002448	cg00768487	-0.003267	cg17586256	-0.008506	cg05582311	-0.00445	cg17353698	-0.005238	cg04464940	-0.005829	cg24217844	-0.003415	cg18043828	-0.004299
cg05732979	-0.001499	cg00049440	-0.002282	cg12134570	-0.0004846	cg22806837	-0.004111	cg16691888	-0.001097	cg02129603	-0.001903	cg05060949	-0.006927	cg26301565	-0.002447	cg14155397	-0.003267	cg12390895	-0.008503	cg13355041	-0.004449	cg00035000	-0.005229	cg02619205	-0.005825	cg21731345	-0.003413	cg15093194	-0.004298
cg05027336	-0.001498	cg11128216	-0.002281	cg02271790	-0.0004843	cg05724997	-0.004109	cg18233746	-0.001097	cg06805557	-0.001902	cg00286853	-0.00692	cg16624692	-0.002445	cg27058257	-0.003266	cg22114489	-0.008499	cg15853117	-0.004447	cg06320134	-0.005228	cg26189983	-0.005823	cg24035962	-0.003413	cg13919466	-0.004297
cg16938490	-0.001498	cg02553516	-0.00228	cg07403397	-0.0004839	cg23209990	-0.004106	cg06740227	-0.001096	cg08909806	-0.001897	cg26514492	-0.006919	cg10985914	-0.002441	cg10587854	-0.003265	cg05479376	-0.008493	cg22135324	-0.004447	cg01434562	-0.005222	cg26478401	-0.005822	cg23661183	-0.003411	cg16358679	-0.004295
cg02194789	-0.001497	cg08017858	-0.00228	cg24190127	-0.0004838	cg14956327	-0.004105	cg11983576	-0.001096	cg27279991	-0.001896	cg13453904	-0.006917	cg04144394	-0.00244	cg02334722	-0.003264	cg04056179	-0.008491	cg09693106	-0.004445	cg08564661	-0.005222	cg17919186	-0.005821	cg03641748	-0.00341	cg19451167	-0.004295
cg05359207	-0.001497	cg26818625	-0.00228	cg24700222	-0.0004834	cg04525491	-0.004104	cg11467638	-0.001095	cg13593448	-0.001895	cg02156680	-0.006915	cg04916091	-0.00244	cg11786870	-0.003263	cg07963497	-0.008488	cg06412358	-0.004444	cg10017888	-0.005222	cg06057141	-0.005819	cg03476007	-0.003408	cg02821342	-0.00429
cg16666964	-0.001496	cg00948275	-0.002278	cg03880173	-0.0004827	cg06760277	-0.004104	cg11482099	-0.001095	cg05210671	-0.001894	cg06246224	-0.006912	cg09398924	-0.002439	cg21064080	-0.003261	cg08751352	-0.008488	cg14830371	-0.004444	cg03505654	-0.00522	ch.X.57019131F	-0.005816	cg15067827	-0.003408	cg23416740	-0.004289
cg27216998	-0.001496	cg23725454	-0.002278	cg09577426	-0.0004827	cg16348385	-0.004101	cg00785738	-0.001094	cg13329912	-0.001894	cg06230948	-0.006911	cg27035251	-0.002439	cg06981182	-0.003259	cg03287340	-0.00848	cg00292857	-0.004442	cg09805405	-0.005217	cg26935020	-0.005811	cg06148974	-0.003407	cg24129873	-0.004288
cg10164885	-0.001494	cg03483267	-0.002277	cg06320828	-0.0004826	cg25300386	-0.0041	cg22379207	-0.001094	cg02928476	-0.001892	cg05698090	-0.006904	cg22112051	-0.002438	cg26259171	-0.003259	cg22230538	-0.008478	cg09285095	-0.004437	cg23736843	-0.005216	cg01511742	-0.005809	cg20268893	-0.003406	cg22021756	-0.004286
cg16443866	-0.001494	cg15177071	-0.002276	cg10129408	-0.0004826	cg17299456	-0.004099	cg07161172	-0.001093	cg14417954	-0.001891	cg06388350	-0.006903	cg25999578	-0.002438	cg19515245	-0.003255	cg18665871	-0.008464	cg14930642	-0.004437	cg01043119	-0.005215	cg04102600	-0.005809	cg25453664	-0.003405	cg13033938	-0.004285
cg00666763	-0.001493	cg16987305	-0.002276	cg00218103	-0.0004824	cg23965689	-0.004099	cg08424184	-0.001093	cg15579148	-0.00189	cg11393185	-0.006899	cg00448761	-0.002437	cg11387340	-0.003253	cg07434780	-0.008458	cg26932441	-0.004433	cg04689023	-0.005214	cg17052926	-0.005807	cg03309253	-0.003404	cg21821990	-0.004284
cg08675092	-0.001493	cg18422875	-0.002274	cg06034933	-0.0004823	cg11500660	-0.004098	cg10942903	-0.001093	cg18261069	-0.00189	cg09680447	-0.006895	cg01645729	-0.002437	cg23531488	-0.00325	cg27347290	-0.008456	cg07941983	-0.004431	cg16721977	-0.005204	cg23989673	-0.005803	cg10296410	-0.003403	cg19116006	-0.004281
cg10020897	-0.001493	cg06029700	-0.002272	cg24035962	-0.0004823	cg09930033	-0.004091	cg20603637	-0.001093	cg24852548	-0.001889	cg09398924	-0.006894	cg22104578	-0.002437	cg01043119	-0.003249	cg01359246	-0.008444	cg10477079	-0.004429	cg08369079	-0.005203	cg06014307	-0.005799	cg04581938	-0.0034	cg20129717	-0.004278
cg12717594	-0.001493	cg03446079	-0.002271	cg17649293	-0.0004821	cg07431229	-0.004089	cg00103778	-0.001092	cg20222376	-0.001888	cg22220165	-0.00689	cg26052635	-0.002436	cg13498289	-0.003249	cg01080924	-0.008436	cg06046574	-0.004425	cg19515245	-0.0052	cg09930017	-0.005798	cg03634479	-0.003398	cg17388996	-0.004272
cg22827210	-0.001493	cg05162750	-0.002271	cg01472538	-0.0004819	cg18968597	-0.004089	cg19924948	-0.001091	cg21251125	-0.001885	cg05743713	-0.006887	cg24797187	-0.002433	cg02545261	-0.003246	cg02315597	-0.008432	cg06741198	-0.004424	cg19828516	-0.005199	cg04908588	-0.005794	cg20721917	-0.003394	cg09177567	-0.004271
cg26069719	-0.001493	cg02632185	-0.00227	cg08416650	-0.0004817	cg24259629	-0.004088	cg02161084	-0.001089	cg01533108	-0.001884	cg07267600	-0.006886	cg09930017	-0.002432	cg10896862	-0.003245	cg07890490	-0.008432	cg09888920	-0.004424	cg02535219	-0.005196	cg11998141	-0.005793	cg04737114	-0.003393	cg13269407	-0.004266
cg02535219	-0.001491	cg17837526	-0.00227	cg10905180	-0.0004815	cg00462107	-0.004086	cg19638477	-0.001089	cg07390647	-0.001884	cg12150022	-0.006885	cg09411730	-0.002429	cg22260952	-0.003245	cg04309911	-0.00843	ch.X.1023208F	-0.004423	cg08640252	-0.005192	cg03012821	-0.005788	cg08230658	-0.00339	cg26525127	-0.004264
cg07808231	-0.001491	cg01894048	-0.002269	cg13888838	-0.0004815	cg08372947	-0.004084	cg27086308	-0.001089	cg19675778	-0.001884	cg23261107	-0.006885	cg27657333	-0.002429	cg15543281	-0.003244	cg09756482	-0.008429	cg03063658	-0.004422	cg13180809	-0.005192	cg13009608	-0.005788	cg08774969	-0.003389	cg08358683	-0.004262
cg08181476	-0.001491	cg14743462	-0.002269	cg23965689	-0.0004813	cg25541958	-0.004084	cg01823541	-0.001088	cg23246821	-0.001884	cg01725199	-0.006884	cg11762018	-0.002427	cg16650717	-0.003244	cg14710552	-0.008428	cg19221620	-0.004422	cg04348419	-0.005187	cg04416414	-0.005787	cg13957558	-0.003389	cg16489610	-0.004259
cg11861709	-0.00149	cg22882178	-0.002268	cg20328396	-0.0004812	cg08079596	-0.004083	cg22460123	-0.001088	cg14420108	-0.001883	cg08640252	-0.006883	cg27084903	-0.002426	cg05318142	-0.003239	cg27662220	-0.008427	cg13600477	-0.004421	cg07161369	-0.005187	cg09166091	-0.005787	cg06001310	-0.003387	cg06107816	-0.004258
cg12391352	-0.00149	cg14401466	-0.002265	cg24902920	-0.0004812	cg25397718	-0.004083	cg19241689	-0.001087	cg26195178	-0.001881	cg14930642	-0.006873	cg20805367	-0.002425	cg06413398	-0.003239	cg12373084	-0.008426	cg10398774	-0.00442	cg26785154	-0.005187	cg20917083	-0.005784	cg09225230	-0.003386	cg05626764	-0.004253
cg18043828	-0.00149	cg01265531	-0.002261	cg11776014	-0.000481	cg17373656	-0.004081	cg25741023	-0.001086	cg00446414	-0.00188	cg27406919	-0.006861	cg27189973	-0.002425	cg17173451	-0.003238	cg08522143	-0.008424	cg18532727	-0.004418	cg00157456	-0.005185	cg06565620	-0.005783	cg25859998	-0.003385	cg26386886	-0.004253
cg16962970	-0.001489	cg09772154	-0.002261	cg15056288	-0.0004809	cg07664480	-0.004078	cg00906319	-0.001085	cg24577193	-0.00188	cg04890576	-0.006858	cg05032934	-0.002423	cg04452959	-0.003237	cg03316176	-0.008419	ch.X.92543860F	-0.004412	cg13299776	-0.005177	cg10436414	-0.005783	cg06162038	-0.003384	cg07928289	-0.00425
cg17851046	-0.001489	cg15618108	-0.002261	cg24361291	-0.0004809	cg20555674	-0.004075	cg20381182	-0.001085	cg03741862	-0.001879	cg14547067	-0.006857	cg13422850	-0.002423	cg00462107	-0.003235	cg13185030	-0.008417	cg26258273	-0.004407	cg14351425	-0.005174	cg27547873	-0.005783	cg14755831	-0.003384	cg09899173	-0.004249
cg25157280	-0.001489	cg06782697	-0.00226	cg12848345	-0.0004803	cg01894048	-0.004072	cg26345216	-0.001085	cg06317507	-0.001877	cg06103394	-0.006855	cg22732101	-0.002422	cg07161369	-0.003235	ch.X.153018199F	-0.008414	cg04264908	-0.004404	cg00734483	-0.005165	cg03802201	-0.005781	cg18475643	-0.003384	cg20863963	-0.004248
cg09268729	-0.001488	cg07303801	-0.00226	cg20392842	-0.0004803	cg03650397	-0.004071	cg17468773	-0.001084	cg09669930	-0.001876	cg23792314	-0.006855	cg27058257	-0.002422	cg11118413	-0.003235	cg18759693	-0.008413	cg09845785	-0.004404	cg00603871	-0.005163	cg27533237	-0.005781	cg09693106	-0.003383	cg14348967	-0.004247
cg14262681	-0.001487	cg20556936	-0.00226	cg03723510	-0.0004801	cg07176034	-0.004071	cg10150686	-0.001083	cg27427514	-0.001873	cg08572016	-0.006851	cg20369204	-0.002418	cg14547067	-0.003235	cg07729537	-0.008411	cg03025135	-0.004403	cg13836518	-0.005162	cg07201215	-0.005773	cg10985914	-0.003383	cg26480413	-0.004245
cg00165888	-0.001486	cg06508783	-0.002259	cg09851545	-0.0004798	cg05359207	-0.004067	cg05694021	-0.001082	cg20432671	-0.001871	cg00279790	-0.006844	cg22589161	-0.002416	cg16498913	-0.003235	cg05419671	-0.008406	cg00589371	-0.004402	cg13914324	-0.005159	cg04279588	-0.005772	cg07873178	-0.003382	cg00828689	-0.004241
cg25741023	-0.001485	cg23199335	-0.002258	cg19871940	-0.0004798	cg08872722	-0.004065	cg16818909	-0.001082	cg11498607	-0.001869	cg12403778	-0.006842	cg18479593	-0.002415	cg21430685	-0.003235	cg05893300	-0.008405	cg18475643	-0.004401	cg09411730	-0.005157	cg24535130	-0.005772	cg13717446	-0.003381	cg11509269	-0.00424
cg17078980	-0.001484	cg08260398	-0.002257	cg04879755	-0.0004795	cg05490659	-0.004064	cg23635374	-0.001082	cg00948275	-0.001868	cg15077343	-0.006833	cg11879741	-0.002413	cg02298094	-0.003232	cg10110083	-0.008405	cg14442841	-0.0044	cg12624829	-0.005154	cg02888113	-0.005771	cg01724607	-0.00338	cg16199277	-0.004239
cg23928165	-0.001484	cg16817070	-0.002255	cg21713473	-0.0004793	cg15784124	-0.004063	cg24529484	-0.001082	cg20684180	-0.001868	cg22827210	-0.006827	cg12155547	-0.002413	cg06947913	-0.003231	cg08251901	-0.008401	cg19493077	-0.004399	cg27533237	-0.005154	cg00142150	-0.00577	cg20138458	-0.00338	cg07572770	-0.004236
cg05810170	-0.001482	cg01282174	-0.002253	cg06297470	-0.000479	cg22890130	-0.004063	cg05406868	-0.00108	cg05671070	-0.001867	cg26911220	-0.006821	cg12526298	-0.002413	cg12668399	-0.003231	cg17795789	-0.008391	cg18781240	-0.004395	cg18399703	-0.005153	cg23778363	-0.005769	cg27045447	-0.00338	cg22349573	-0.004235
cg07077694	-0.001482	cg01780754	-0.002253	cg22729726	-0.000479	cg25694349	-0.004063	cg13995427	-0.00108	cg13038685	-0.001867	cg11776014	-0.00682	cg14657525	-0.002412	cg20125569	-0.003229	cg26428073	-0.008389	cg18363192	-0.004392	cg00097626	-0.005152	cg15177071	-0.005764	cg03719128	-0.003378	cg02378269	-0.004234
cg10453420	-0.001481	cg03466124	-0.002253	cg10150686	-0.0004789	cg07144296	-0.004062	cg00838898	-0.001078	cg08162803	-0.001866	cg08996521	-0.006818	cg09357438	-0.002411	cg04525491	-0.003228	cg04596060	-0.008384	cg19793905	-0.004389	cg02998620	-0.005147	cg01633184	-0.005762	cg18258224	-0.003378	cg25609393	-0.004228
cg27563048	-0.001481	cg07358267	-0.002253	cg25890168	-0.0004788	cg08557120	-0.004058	cg15118824	-0.001078	cg23930334	-0.001864	cg08578245	-0.006814	cg01228636	-0.00241	cg27138204	-0.003227	cg24259629	-0.008384	cg00157456	-0.004388	cg12373208	-0.005144	cg07443287	-0.005762	cg11215918	-0.003376	cg07220293	-0.004226
cg05457273	-0.00148	cg08231348	-0.002252	cg00145177	-0.0004785	cg09132264	-0.004057	cg16624692	-0.001077	cg03699074	-0.001863	cg06693487	-0.006808	cg14426428	-0.00241	cg14120010	-0.003225	cg07254421	-0.008383	cg25016544	-0.004386	cg06652329	-0.005142	cg04789589	-0.00576	cg02427330	-0.003375	cg14660125	-0.004223
cg13298147	-0.00148	cg16417447	-0.002252	cg14420108	-0.0004785	cg07933176	-0.004055	cg16729690	-0.001074	cg13265740	-0.001863	cg16624692	-0.006802	cg23551494	-0.00241	cg06251289	-0.003223	cg15043720	-0.00838	cg09896120	-0.004384	cg07110659	-0.005142	cg21757368	-0.005755	cg10517014	-0.003371	cg01094748	-0.004214
cg15896098	-0.00148	cg00804078	-0.002251	cg25716814	-0.0004785	cg22862193	-0.004052	cg03315007	-0.001073	cg08208317	-0.001862	cg16940012	-0.006798	cg17552333	-0.002409	cg01872216	-0.003222	cg00259834	-0.008371	cg10406027	-0.004376	cg08970347	-0.005138	cg09285095	-0.005754	cg20211816	-0.003371	cg02097309	-0.004212
cg03563100	-0.001479	cg04710402	-0.002251	cg07508229	-0.0004784	cg18456803	-0.00405	cg25126090	-0.001073	cg05636131	-0.00186	cg11382133	-0.006793	cg21642245	-0.002409	cg11762018	-0.003222	cg25266109	-0.008371	cg00178897	-0.004374	cg26493353	-0.005137	ch.X.1282647F	-0.005752	cg04525491	-0.003369	cg26559209	-0.004212
cg04511728	-0.001479	cg00198594	-0.00225	cg19049607	-0.0004783	cg23174932	-0.004048	cg25859998	-0.001073	cg07510080	-0.00186	cg12526298	-0.006788	cg01244650	-0.002408	cg06740227	-0.003221	cg26140475	-0.008371	cg06861572	-0.004372	cg20943039	-0.005136	cg07873178	-0.00575	cg17510056	-0.003369	cg19190217	-0.004208
cg05769790	-0.001479	cg16716750	-0.00225	cg24536146	-0.0004783	cg12630147	-0.004045	cg05027458	-0.001072	cg01361499	-0.001859	cg23708763	-0.006788	cg20175702	-0.002408	cg14917395	-0.00322	cg26929012	-0.008366	cg14639897	-0.004371	cg14258853	-0.005134	cg05060704	-0.005748	cg11225528	-0.003366	cg07890490	-0.004207
cg25693289	-0.001478	cg20328396	-0.002249	cg07654569	-0.000478	cg21778174	-0.004045	cg10851739	-0.001072	cg11344352	-0.001859	cg08307963	-0.006787	cg12189551	-0.002405	cg23976464	-0.003219	cg02998620	-0.008364	cg19143990	-0.004371	cg14417954	-0.005134	cg10942898	-0.005748	cg05098590	-0.003362	cg19493077	-0.004207
cg11401682	-0.001476	cg07265541	-0.002248	cg02315271	-0.0004779	cg08349497	-0.004044	cg21435568	-0.001072	cg06621373	-0.001858	cg20433906	-0.006785	cg22783363	-0.002405	cg00343633	-0.003218	cg05434655	-0.008362	cg07471461	-0.004368	cg02111748	-0.005132	cg12591315	-0.005746	cg22125370	-0.003362	cg21972382	-0.004207
cg03783410	-0.001475	cg18077971	-0.002247	cg04160501	-0.0004778	cg19243939	-0.004044	cg04672538	-0.001071	cg11087049	-0.001857	cg13273789	-0.006781	cg02043070	-0.002403	cg14823389	-0.003218	cg04935121	-0.008361	cg00232402	-0.004367	cg08999915	-0.005132	cg17618595	-0.005746	cg17388996	-0.00336	cg18499530	-0.004206
cg04313875	-0.001475	cg07091207	-0.002246	cg04624601	-0.0004778	cg04123409	-0.004043	cg22177364	-0.00107	cg11696475	-0.001857	cg12448724	-0.006777	cg02237629	-0.002403	cg00002719	-0.003215	cg16754364	-0.00836	cg02108623	-0.004364	cg11568368	-0.005132	cg23268677	-0.005741	cg04148584	-0.003359	cg06366981	-0.004205
cg09647147	-0.001475	cg12513505	-0.002246	cg08774969	-0.0004778	cg04619627	-0.004039	cg04581938	-0.001069	cg10377245	-0.001856	cg26988138	-0.006777	cg13986130	-0.002401	cg22104578	-0.003215	cg04329105	-0.008358	cg10229594	-0.004364	cg06713116	-0.00513	cg27626141	-0.00574	cg03060555	-0.003358	cg09557387	-0.004201
cg22460123	-0.001475	cg10944735	-0.002245	cg03143164	-0.0004776	cg12532500	-0.004039	cg00262446	-0.001068	cg20175702	-0.001856	cg14823389	-0.006775	cg15836635	-0.002401	cg00589371	-0.003213	cg03712758	-0.008353	cg11983576	-0.004364	cg22853371	-0.005129	cg06980547	-0.00573	cg03802201	-0.003358	cg03176917	-0.0042
cg27393325	-0.001475	cg16430072	-0.002245	cg11162118	-0.0004775	cg05054438	-0.004037	cg00666763	-0.001068	cg05626764	-0.001855	cg22598028	-0.006765	cg18241829	-0.002401	cg03143164	-0.003211	cg18110444	-0.008352	cg19657603	-0.004364	cg00662647	-0.005127	cg04916984	-0.005727	cg12373084	-0.003356	cg18191418	-0.004196
cg02958321	-0.001474	cg22374485	-0.002245	cg04581938	-0.0004766	cg09222023	-0.004035	cg08218061	-0.001068	cg11082691	-0.001854	cg03217795	-0.006764	cg20776829	-0.002401	cg04127825	-0.003211	cg20778582	-0.00835	cg06100227	-0.00436	cg08244262	-0.005125	cg22104578	-0.005726	cg18179075	-0.003356	cg26322248	-0.004196
cg15414833	-0.001474	cg04609859	-0.002244	cg05822532	-0.0004766	cg22664064	-0.004034	cg13939204	-0.001068	cg15934674	-0.001854	cg07375150	-0.006764	cg02466588	-0.0024	cg06370771	-0.003209	cg19418951	-0.008346	cg24935042	-0.00436	cg11382133	-0.00512	cg22956254	-0.005723	cg03935432	-0.003355	cg09367891	-0.004194
cg14954143	-0.001472	cg09072408	-0.002243	cg17003260	-0.0004765	cg04289040	-0.00403	cg27465717	-0.001068	cg14317609	-0.001851	cg00679738	-0.006761	cg12105450	-0.0024	cg14864103	-0.003204	cg03025135	-0.008343	cg14425257	-0.004359	cg20933634	-0.005118	cg00577865	-0.005722	cg10126874	-0.003355	cg10515956	-0.004189
cg18532727	-0.001472	cg11205072	-0.002243	cg22711676	-0.0004765	cg05822031	-0.00403	cg05743713	-0.001067	cg25694349	-0.001851	cg26052635	-0.006751	cg18800827	-0.0024	cg14426428	-0.003203	cg16064054	-0.008342	cg09177518	-0.004358	cg20549620	-0.005117	cg21913319	-0.005721	cg07561162	-0.003354	cg07392449	-0.004187
cg26332926	-0.001472	cg09344183	-0.002241	cg00506629	-0.0004764	cg07473249	-0.004029	cg11659749	-0.001067	cg04564030	-0.00185	cg02534163	-0.006743	cg04908588	-0.002399	cg15786837	-0.003202	cg23220551	-0.008341	cg21446955	-0.004358	cg22351904	-0.005113	cg05626764	-0.005719	cg15153383	-0.003354	cg12373084	-0.004182
cg02020296	-0.001471	cg15251374	-0.002241	cg24714011	-0.0004763	cg06118999	-0.004027	cg00662647	-0.001066	cg06822689	-0.00185	cg06475541	-0.006742	cg05449136	-0.002398	cg22409276	-0.003202	cg27145699	-0.008338	cg24410214	-0.004356	cg23590202	-0.005107	cg00241638	-0.005718	cg26224223	-0.003354	cg13482308	-0.00418
cg04160501	-0.001471	cg27189973	-0.002241	cg14371524	-0.0004762	cg06463759	-0.004026	cg09278098	-0.001066	cg20117153	-0.00185	cg14888916	-0.006739	cg06487301	-0.002398	cg11185792	-0.003198	cg15079315	-0.008334	cg01068407	-0.004354	cg02503981	-0.005102	cg07838098	-0.005715	cg06419432	-0.003353	cg04276084	-0.004179
cg09307284	-0.00147	cg27315170	-0.002241	cg23209990	-0.0004756	cg22982767	-0.004024	cg15079315	-0.001066	cg27031435	-0.00185	cg12105450	-0.006735	cg14900388	-0.002398	cg16146033	-0.003197	cg17174775	-0.008334	cg10985914	-0.004354	cg10673740	-0.005102	cg23954922	-0.005714	cg04329105	-0.003352	cg11608897	-0.004178
cg01080924	-0.001469	cg27058257	-0.00224	cg19229344	-0.0004754	cg23840219	-0.004023	cg01787285	-0.001065	cg01740766	-0.001849	cg26466789	-0.006734	cg17851046	-0.002397	cg26026416	-0.003197	cg08578245	-0.008333	cg25347264	-0.004354	cg20048434	-0.005101	cg04576568	-0.005713	cg08404009	-0.003351	cg13510327	-0.004175
cg14956197	-0.001469	cg04118888	-0.002239	cg17851046	-0.0004749	cg27392024	-0.004022	cg25157914	-0.001065	cg06929846	-0.001849	cg03584113	-0.006721	cg16650292	-0.002396	cg03029127	-0.003196	cg23197862	-0.008332	cg11805450	-0.00435	cg05922563	-0.0051	cg22306928	-0.005713	cg07196673	-0.00335	cg17979824	-0.004175
cg19669036	-0.001469	cg03209642	-0.002238	cg24321347	-0.0004749	cg16536718	-0.004021	cg23821329	-0.001064	cg15786837	-0.001848	cg17997279	-0.00672	cg08879559	-0.002393	cg01794103	-0.003195	cg04550398	-0.008329	cg20457193	-0.004349	cg09575114	-0.005099	cg01094748	-0.005711	cg02998620	-0.003349	cg08521684	-0.004174
cg10358954	-0.001467	cg16583330	-0.002238	cg02334722	-0.0004748	cg14732998	-0.004019	cg02119927	-0.001063	cg01434562	-0.001847	cg03709475	-0.006719	cg13432616	-0.002393	cg04134048	-0.003193	cg14425257	-0.008325	cg15351186	-0.004347	cg21034023	-0.005099	cg00632466	-0.005707	cg15739309	-0.003347	cg02293936	-0.004172
cg09677252	-0.001466	cg11612291	-0.002237	cg06679694	-0.0004742	cg21076702	-0.004018	cg04525943	-0.001063	cg26744375	-0.001847	cg27234864	-0.006717	cg13134535	-0.002392	cg13437593	-0.003193	cg26835302	-0.008324	cg01179580	-0.004343	cg00397324	-0.005098	cg14351425	-0.005705	cg05893300	-0.003346	cg06774797	-0.004172
cg00187933	-0.001465	cg01909921	-0.002235	cg26525127	-0.0004741	cg23678215	-0.004018	cg07166409	-0.001063	cg13717446	-0.001844	cg03315007	-0.006711	cg03854765	-0.002391	cg17069739	-0.003193	cg23000808	-0.008323	cg06118999	-0.004343	cg02154956	-0.005098	cg09029902	-0.0057	cg13665890	-0.003345	cg10061361	-0.004171
cg03254465	-0.001464	cg00145177	-0.002234	cg17996329	-0.0004737	cg05249026	-0.004014	cg23654971	-0.001063	cg10536999	-0.001843	cg08331313	-0.00671	cg14515996	-0.002391	cg18709545	-0.003192	cg15732812	-0.008322	cg16453560	-0.004342	cg11833968	-0.005097	cg01740172	-0.005699	cg07056567	-0.003344	cg15853117	-0.004171
cg22016779	-0.001464	cg06531379	-0.002234	cg23461714	-0.0004733	cg18589481	-0.004013	cg00157796	-0.001062	cg16716750	-0.001842	cg11926776	-0.00671	cg17423207	-0.00239	cg22757391	-0.003191	cg03063658	-0.008316	cg25554917	-0.004339	cg18474180	-0.005093	cg19121473	-0.005699	cg17671608	-0.003344	cg06388350	-0.00417
cg06578825	-0.001463	cg24139898	-0.002233	cg20869673	-0.0004727	cg01750375	-0.004011	cg01056889	-0.001062	cg17601658	-0.001842	cg25023994	-0.006708	cg13668544	-0.002388	cg26835302	-0.00319	cg16653495	-0.008316	cg02665570	-0.004338	cg16630482	-0.005092	cg07045891	-0.005697	cg07976644	-0.003343	ch.X.112526203R	-0.004169
cg06940792	-0.001463	cg00035000	-0.002232	cg11612694	-0.0004726	cg04624601	-0.004011	cg13537353	-0.001062	cg16560774	-0.001841	cg11947493	-0.006706	cg19176391	-0.002387	cg06447552	-0.003189	cg27140247	-0.008312	cg21573047	-0.004337	cg07751196	-0.005088	cg27049993	-0.005694	cg17164063	-0.003343	cg10511249	-0.004167
cg13432616	-0.001463	cg06197769	-0.002229	cg22973042	-0.0004724	cg01447281	-0.004009	cg19397128	-0.001062	cg23139609	-0.001841	cg19445996	-0.006702	cg03309253	-0.002386	cg00446414	-0.003187	cg04581938	-0.00831	cg16202624	-0.004336	cg16411256	-0.005088	cg23254047	-0.005693	cg25202070	-0.003343	cg27547873	-0.004165
cg00351011	-0.001462	cg00396484	-0.002228	cg10775273	-0.0004723	cg05143735	-0.004009	cg08154437	-0.001061	cg14900388	-0.00184	cg22017733	-0.006702	cg00446414	-0.002385	cg00109076	-0.003185	cg26258273	-0.00831	cg12403778	-0.004334	cg02497700	-0.005087	cg22827124	-0.005691	cg15446845	-0.003342	cg25905674	-0.004164
cg01505406	-0.001461	cg20641465	-0.002228	cg24686357	-0.0004722	cg10375078	-0.004007	cg17104258	-0.001061	cg24748769	-0.00184	cg27570249	-0.006699	cg04233717	-0.002385	cg23244022	-0.003183	cg15542798	-0.008308	cg12259256	-0.004333	cg04313875	-0.005087	cg24709703	-0.005689	cg00573330	-0.00334	cg15260466	-0.004162
cg04138112	-0.001458	cg18665871	-0.002226	cg24102622	-0.0004719	cg18043828	-0.004007	cg21913319	-0.001061	cg27315170	-0.001839	cg22513169	-0.006697	cg05191175	-0.002385	cg22349573	-0.003182	cg12384572	-0.008301	cg26085804	-0.004332	cg22478210	-0.00508	cg04056179	-0.005687	cg21010450	-0.00334	cg04636841	-0.004161
cg04302194	-0.001458	cg27279991	-0.002226	cg06490869	-0.0004717	cg01244650	-0.004006	cg10502118	-0.00106	cg01567239	-0.001838	cg22049858	-0.00669	cg18733757	-0.002385	cg24948962	-0.003181	cg06433658	-0.008299	cg02172652	-0.004331	cg00446414	-0.005079	cg05747376	-0.005687	cg04895321	-0.003334	cg14607407	-0.004159
cg23316987	-0.001458	cg12997720	-0.002225	cg00288327	-0.0004715	cg27084903	-0.004004	cg13442299	-0.00106	cg05143735	-0.001838	cg11236550	-0.006688	cg25135018	-0.002385	cg12178980	-0.00318	cg14943135	-0.008299	cg15833534	-0.004329	cg08787401	-0.005074	cg14131272	-0.005685	cg12145080	-0.003334	cg22783363	-0.004158
cg00732274	-0.001457	cg24533757	-0.002224	cg21359747	-0.0004713	cg04030842	-0.004002	cg21242684	-0.00106	cg08372947	-0.001838	cg13014531	-0.006686	cg08307963	-0.002384	cg08230658	-0.003177	cg05645404	-0.008295	cg23261107	-0.004324	cg14629021	-0.005073	cg20342628	-0.005685	cg20560075	-0.003334	cg19076255	-0.004157
cg25456477	-0.001456	cg05143735	-0.002223	cg13686615	-0.0004711	cg19493077	-0.004001	cg11081723	-0.001059	cg13437593	-0.001838	cg08727535	-0.006684	cg09501687	-0.002384	cg20762861	-0.003177	cg21642245	-0.008291	cg06367647	-0.004321	cg23197862	-0.005073	cg08404009	-0.005683	cg23254047	-0.003334	cg04581613	-0.004153
cg26760589	-0.001456	cg08774969	-0.002223	cg08647349	-0.0004706	cg11531787	-0.004	cg16146033	-0.001059	cg09772154	-0.001837	cg18399703	-0.00668	cg05038216	-0.002383	cg17130457	-0.003176	cg05624244	-0.008288	cg17475110	-0.004321	ch.X.1667329F	-0.005073	cg11393185	-0.005681	cg07443287	-0.003333	cg09263118	-0.004153
cg07779120	-0.001455	cg04557018	-0.002222	cg23896514	-0.0004705	cg25584081	-0.003998	cg18036569	-0.001059	cg19871940	-0.001837	cg02001279	-0.006679	cg05038268	-0.002382	cg19741456	-0.003176	cg08872722	-0.008288	cg17671608	-0.004317	cg03327619	-0.005072	cg13381718	-0.005676	cg14609729	-0.003333	cg24530116	-0.004152
cg12224633	-0.001455	cg19753794	-0.002222	cg19356311	-0.0004704	cg14588411	-0.003991	cg19258034	-0.001059	cg03638795	-0.001835	cg00306298	-0.006676	cg16666964	-0.002381	cg25442239	-0.003176	cg12897947	-0.008288	cg02877538	-0.004316	cg04569837	-0.005072	cg21697198	-0.005672	cg20082170	-0.003332	cg07753583	-0.00415
cg20222376	-0.001455	cg10511988	-0.002221	cg14732324	-0.0004701	cg23032936	-0.003991	cg25287071	-0.001059	cg25575553	-0.001835	cg00109076	-0.006673	cg00906319	-0.00238	cg10112391	-0.003169	cg03697708	-0.008278	cg19422030	-0.004316	cg10521638	-0.005072	cg12286963	-0.005668	cg12259256	-0.003331	cg08441931	-0.004147
cg23885932	-0.001455	cg14776518	-0.002221	cg07753583	-0.0004696	cg13797825	-0.003989	cg11203397	-0.001058	cg02553516	-0.001834	cg17083560	-0.006673	cg18756545	-0.00238	cg10753610	-0.003168	cg22571038	-0.008277	cg09930017	-0.004315	cg25491558	-0.005072	cg13084458	-0.005667	cg12656077	-0.003331	ch.X.42854404F	-0.004146
cg02710571	-0.001454	cg20287074	-0.002221	cg02619205	-0.0004692	cg02719245	-0.003988	cg15298486	-0.001058	cg10098021	-0.001834	cg11291081	-0.006672	cg20972214	-0.00238	cg00450784	-0.003166	cg05810170	-0.008276	cg20865151	-0.004315	cg03029127	-0.005071	ch.X.557489R	-0.005667	cg19737037	-0.00333	cg17895254	-0.004145
cg04424443	-0.001453	cg01040585	-0.002219	cg20383155	-0.0004692	cg21136715	-0.003988	cg22801992	-0.001058	cg10317138	-0.001833	cg01597066	-0.006666	cg24902920	-0.002379	cg13836518	-0.003166	cg02619205	-0.008275	cg07274590	-0.004313	cg25868286	-0.005068	cg24646513	-0.005663	cg25532501	-0.003329	cg03065202	-0.00414
cg00106074	-0.00145	cg20344326	-0.002218	cg23165899	-0.000469	cg24755910	-0.003988	cg09180848	-0.001057	cg17320237	-0.001832	cg09276998	-0.006666	cg06069616	-0.002376	cg24797187	-0.003166	cg24361291	-0.008275	cg05683227	-0.00431	cg03719128	-0.005067	cg11190754	-0.005661	cg05999245	-0.003328	cg23261107	-0.00414
cg11571263	-0.001447	cg16326242	-0.002216	cg27035251	-0.0004687	cg00403955	-0.003986	cg12610207	-0.001057	cg23166970	-0.001832	cg04233717	-0.006665	cg08437570	-0.002376	cg11334818	-0.003163	cg02560388	-0.008271	cg04249706	-0.004305	cg15821939	-0.005062	cg01750375	-0.005658	cg20933634	-0.003328	cg04513006	-0.004139
cg15423035	-0.001447	cg16983211	-0.002215	cg27503573	-0.0004686	cg24504954	-0.003986	cg19111999	-0.001057	cg10984625	-0.00183	cg15832822	-0.006657	cg26650655	-0.002376	cg03139898	-0.003162	cg16855845	-0.008266	cg13088406	-0.004305	cg25438963	-0.00506	cg11424456	-0.005656	cg20092046	-0.003326	cg24633771	-0.004139
cg26299194	-0.001447	cg20561863	-0.002214	cg13269407	-0.0004684	cg02161478	-0.003985	cg00096845	-0.001056	cg01490258	-0.001829	cg00778807	-0.006653	cg00343633	-0.002375	cg00210473	-0.003161	cg17104258	-0.008261	cg00282704	-0.004301	cg11569486	-0.005056	cg20596640	-0.005647	cg05694021	-0.003324	cg04249706	-0.004138
cg06034933	-0.001446	cg01943641	-0.002211	cg12373208	-0.0004679	cg04696149	-0.003985	cg23691090	-0.001056	cg11194994	-0.001828	cg18565473	-0.006653	cg10932907	-0.002375	cg01750375	-0.003161	cg27626102	-0.008255	cg04641787	-0.0043	cg17114257	-0.005056	cg04912566	-0.005646	cg21933859	-0.003324	cg07254821	-0.004134
cg17568707	-0.001446	cg04576672	-0.002211	cg06166242	-0.0004671	cg25456477	-0.00398	cg26001287	-0.001056	cg01901107	-0.001827	cg14956327	-0.006647	cg07004443	-0.002373	cg22783363	-0.003161	cg23261107	-0.008249	cg07158808	-0.0043	cg07372034	-0.005055	cg09357438	-0.005646	cg04279588	-0.003318	cg14582298	-0.004134
cg24691336	-0.001446	cg14246617	-0.002211	cg16761581	-0.0004668	cg05299486	-0.003976	cg03030717	-0.001055	cg02853703	-0.001827	cg23525243	-0.006642	cg05636131	-0.002371	cg25254825	-0.003161	cg25733480	-0.008245	cg14034852	-0.0043	cg21735491	-0.005054	cg17904997	-0.005645	cg06774797	-0.003318	cg13084458	-0.004132
cg08424184	-0.001445	cg17332897	-0.00221	cg12093371	-0.0004667	cg10951873	-0.003976	cg17329287	-0.001055	cg24882673	-0.001827	cg04685228	-0.006638	cg21893284	-0.00237	cg04875789	-0.003155	cg02750234	-0.008242	cg21359747	-0.0043	cg08805338	-0.005053	cg12855166	-0.005644	cg01514703	-0.003317	cg24154161	-0.004132
cg09763162	-0.001445	cg02237629	-0.002208	cg12361223	-0.0004667	cg15847989	-0.003976	cg20933634	-0.001055	cg17346857	-0.001826	cg07971188	-0.006638	cg24419324	-0.00237	cg13273789	-0.003155	cg26248552	-0.008241	cg01769457	-0.004298	cg15620384	-0.005053	cg25666919	-0.005644	cg10489124	-0.003317	ch.X.108297408F	-0.004132
cg27465717	-0.001445	cg02710571	-0.002208	cg09194159	-0.0004666	cg03287340	-0.003973	cg02077793	-0.001054	cg27310092	-0.001826	cg08970347	-0.006638	cg03196720	-0.002367	cg17698295	-0.003154	cg11654148	-0.008238	cg15916004	-0.004298	cg19190728	-0.00505	cg25979598	-0.005643	cg01498907	-0.003316	cg20684180	-0.00413
cg03123370	-0.001444	cg09682311	-0.002208	cg10457563	-0.0004665	cg15480012	-0.003973	cg05064297	-0.001054	cg10398774	-0.001825	cg04452959	-0.006632	cg05156137	-0.002365	cg16958524	-0.003153	cg00262446	-0.008237	cg23922454	-0.004297	cg04964062	-0.005049	cg02214414	-0.00564	cg07664480	-0.003316	cg01202265	-0.004128
cg00275449	-0.001443	cg19858214	-0.002208	cg18243072	-0.0004661	cg02632185	-0.003971	cg07629965	-0.001054	cg04865841	-0.001824	cg27533237	-0.006625	cg00500522	-0.002364	cg19037922	-0.003153	cg04845871	-0.008236	cg26731119	-0.004297	cg26342671	-0.005047	cg10851739	-0.005638	cg20129717	-0.003316	cg06197769	-0.004126
cg04162647	-0.001443	cg08035234	-0.002207	cg26466789	-0.0004661	cg08369079	-0.003971	cg09978533	-0.001054	cg13483882	-0.001823	cg25093503	-0.006619	cg18151987	-0.002364	cg02097309	-0.003152	cg16371864	-0.008229	cg03536654	-0.004296	cg00753492	-0.005046	cg20250126	-0.005637	cg24129873	-0.003312	cg13334650	-0.004126
cg26827987	-0.001443	cg12134900	-0.002207	cg19431881	-0.0004655	cg10293422	-0.003971	cg07510080	-0.001053	cg05643303	-0.001822	cg08587775	-0.006618	cg04822405	-0.002363	cg07654569	-0.003152	ch.X.1171704R	-0.008229	cg20943039	-0.004296	cg05999245	-0.005045	cg25746764	-0.005637	cg20908919	-0.003309	cg10877050	-0.004125
cg02980693	-0.001442	cg00666763	-0.002206	cg26258273	-0.0004655	cg05962325	-0.00397	cg08073882	-0.001053	cg23012579	-0.001822	cg03379131	-0.006617	cg09180848	-0.002363	cg08869273	-0.003152	cg03468249	-0.008228	cg05469346	-0.004295	cg12036735	-0.005045	cg27355456	-0.005634	cg10148280	-0.003307	cg16371864	-0.004125
cg04812509	-0.001442	cg04673590	-0.002206	cg17215036	-0.0004654	cg07062043	-0.00397	cg16260696	-0.001053	cg06491116	-0.001821	cg01787285	-0.006613	cg00483562	-0.002362	cg19335943	-0.003152	cg16695758	-0.008226	cg13414478	-0.004295	cg24646513	-0.005045	cg05080281	-0.005626	cg04829853	-0.003306	cg04641787	-0.004122
cg10987597	-0.001442	cg09217215	-0.002206	cg00339300	-0.0004651	cg02451730	-0.003969	cg18351406	-0.001053	cg23244559	-0.001821	cg08122140	-0.006613	cg12436196	-0.002361	cg25587069	-0.003151	cg10398774	-0.008215	cg18441811	-0.004295	cg27086308	-0.005045	cg04118888	-0.005625	cg07865517	-0.003303	cg12081743	-0.004122
cg11482422	-0.001442	cg01954531	-0.002205	cg20249584	-0.0004649	cg17034088	-0.003965	cg26295921	-0.001053	cg23478293	-0.001821	cg17780956	-0.006607	cg26561413	-0.002361	cg25586410	-0.00315	cg05643592	-0.008212	cg23497767	-0.004295	cg03741862	-0.005044	cg06621373	-0.005625	cg16624272	-0.003303	cg25439632	-0.004121
cg15701237	-0.001442	cg26916780	-0.002205	cg22956254	-0.0004646	cg12551029	-0.003963	cg06662568	-0.001052	cg07170300	-0.00182	cg21155380	-0.006607	cg21757368	-0.002359	cg01447281	-0.003148	cg07211894	-0.008212	cg12060472	-0.004294	cg11067907	-0.005044	cg22444720	-0.005625	cg21757368	-0.003301	cg27021999	-0.00412
cg17104258	-0.001442	cg11756095	-0.002203	cg15751452	-0.0004644	cg26465214	-0.003963	cg19752722	-0.001052	cg22451910	-0.00182	cg25300386	-0.006605	cg19787727	-0.002357	cg06693277	-0.003144	cg04739306	-0.008211	cg02560388	-0.004293	cg03780561	-0.005043	cg04596060	-0.00562	cg12624829	-0.0033	cg10984625	-0.004119
cg23833896	-0.001442	cg14567593	-0.002203	cg14305711	-0.0004643	cg02493939	-0.003961	cg08275306	-0.001051	cg08925398	-0.001817	cg10423607	-0.006595	cg22460123	-0.002356	cg12256688	-0.003142	cg15100227	-0.008206	cg05281645	-0.004293	cg19762657	-0.005037	cg09756482	-0.005618	cg09278098	-0.003299	cg22198946	-0.004119
cg00314771	-0.001441	cg13357602	-0.002202	cg12997720	-0.0004641	cg24085895	-0.003961	cg11019430	-0.001051	cg05822532	-0.001816	cg10169869	-0.006594	ch.X.1282647F	-0.002356	cg02483484	-0.003141	cg05060704	-0.008205	cg13475583	-0.004291	cg17807131	-0.005035	cg19542359	-0.005618	cg24861272	-0.003297	cg18677101	-0.004117
cg03172801	-0.001441	cg07751641	-0.0022	cg08573893	-0.0004638	cg14149680	-0.00396	cg18097224	-0.001051	cg19893132	-0.001815	cg08067617	-0.006592	cg03476007	-0.002355	cg13919466	-0.00314	ch.X.881064F	-0.008201	cg01329010	-0.00429	cg21979724	-0.005032	cg17510056	-0.005616	cg11634496	-0.003294	cg25522149	-0.004117
cg10942903	-0.001441	cg27294816	-0.0022	cg01574564	-0.0004631	cg19826026	-0.003958	cg09222023	-0.00105	cg04989706	-0.001814	cg09072408	-0.006588	cg03998173	-0.002355	cg17609158	-0.00314	cg17382198	-0.0082	cg00531750	-0.004288	cg08811314	-0.005029	cg07361858	-0.005612	cg16252933	-0.003294	cg04522310	-0.004116
cg10946669	-0.001441	cg00971050	-0.002199	cg00827989	-0.0004627	cg03716591	-0.003955	cg12920938	-0.00105	cg21359747	-0.001814	cg17793819	-0.006585	cg13739417	-0.002354	cg01535733	-0.003139	cg05327835	-0.008199	cg06981182	-0.004288	cg14823389	-0.005028	cg20908919	-0.005612	cg15203735	-0.003293	cg23691090	-0.004116
cg11879741	-0.00144	cg03230711	-0.002199	cg16034881	-0.0004624	cg06861572	-0.003954	cg19650157	-0.00105	cg21701395	-0.001814	cg26487031	-0.006582	cg15424250	-0.002354	cg18202336	-0.003138	cg07158808	-0.008194	cg18036569	-0.004287	cg12150022	-0.005027	cg21272913	-0.005611	cg04880751	-0.003292	cg01556075	-0.004115
cg17284070	-0.00144	cg15743922	-0.002197	cg18758906	-0.0004624	cg24091241	-0.003954	cg07469594	-0.001049	cg03641748	-0.001813	cg03162779	-0.00658	cg08940001	-0.002352	cg18800827	-0.003137	cg21794428	-0.008189	cg03085712	-0.004286	cg18405140	-0.005027	cg09763162	-0.00561	cg03294066	-0.003291	cg05864433	-0.004113
cg21210224	-0.00144	cg17586256	-0.002197	cg23676439	-0.0004624	cg02194789	-0.003953	cg10948359	-0.001048	cg03662648	-0.001813	cg04645070	-0.006578	cg09740133	-0.002352	cg24862483	-0.003137	cg17449851	-0.008187	cg04875162	-0.004286	cg27417294	-0.005025	cg04153116	-0.005608	cg10308629	-0.003291	cg00804078	-0.004111
cg25016544	-0.00144	cg21183523	-0.002196	cg05143735	-0.0004621	cg14233838	-0.003952	cg14284211	-0.001048	cg10316474	-0.001812	cg05726195	-0.006578	cg05490659	-0.002351	cg03315007	-0.003136	cg14629021	-0.008185	cg09043127	-0.004285	cg00294109	-0.00502	cg27558095	-0.005608	cg18540455	-0.003288	cg04576568	-0.004111
cg07960154	-0.001439	cg02396676	-0.002194	cg08388041	-0.0004621	cg22990198	-0.003948	ch.X.938089F	-0.001048	cg20287074	-0.001812	ch.X.112118442F	-0.006578	cg21869956	-0.002351	cg01000615	-0.003135	cg05626764	-0.008181	cg06014307	-0.004284	cg06929846	-0.00502	cg07592723	-0.005607	cg01909921	-0.003286	cg16411256	-0.004111
cg01567239	-0.001438	cg08529260	-0.002193	cg09682311	-0.0004619	cg11190754	-0.003944	cg14639897	-0.001047	cg01637404	-0.001811	cg07091207	-0.006577	cg26860182	-0.002351	cg09994323	-0.003134	cg09398924	-0.00817	cg04958411	-0.004283	cg13250001	-0.00502	cg03003009	-0.005605	cg27127903	-0.003285	cg03059112	-0.004107
cg02632185	-0.001438	cg10046620	-0.002193	cg14415816	-0.0004618	cg06166242	-0.003941	cg05054438	-0.001046	cg01894048	-0.001811	cg23435746	-0.006576	cg01031400	-0.00235	cg23194926	-0.003132	cg14317609	-0.00817	cg12206423	-0.004283	cg26269613	-0.005019	cg10576280	-0.005605	cg26322248	-0.003282	cg23896514	-0.004106
ch.X.57019131F	-0.001438	cg26063563	-0.002193	cg14950169	-0.0004617	cg11983576	-0.003941	cg10470489	-0.001046	cg05759347	-0.001811	cg05261559	-0.006575	cg03802201	-0.002349	cg10307145	-0.003128	cg02331902	-0.008167	cg10996111	-0.004276	cg05960677	-0.005018	cg24851858	-0.005605	cg07723365	-0.003279	cg07304536	-0.004105
cg00733005	-0.001437	cg07116393	-0.002192	cg04877910	-0.0004614	cg07888856	-0.003937	cg12229666	-0.001046	cg15481636	-0.001811	cg00552318	-0.006573	cg08676425	-0.002349	cg14121142	-0.003128	cg13058457	-0.008167	cg01287054	-0.004272	cg13098318	-0.005017	cg09011597	-0.005604	cg16214267	-0.003279	cg23260877	-0.004102
cg08332594	-0.001437	cg13215970	-0.002192	cg00753658	-0.0004613	cg11462315	-0.003937	cg10633838	-0.001044	cg25287257	-0.00181	cg18352516	-0.006573	cg10110083	-0.002348	cg16521978	-0.003128	cg16750801	-0.008166	cg01657408	-0.004271	cg07531860	-0.005016	cg17419241	-0.005603	cg17382198	-0.003276	cg18343292	-0.004101
cg18447772	-0.001437	cg16288248	-0.002192	cg11382133	-0.0004613	cg12373084	-0.003937	cg20544372	-0.001044	cg19623237	-0.001809	ch.X.87262228F	-0.006569	cg01787285	-0.002347	cg27627209	-0.003128	cg16761581	-0.008163	cg07616394	-0.004271	cg16335762	-0.005015	cg02396676	-0.005601	cg17083560	-0.003274	cg19576806	-0.004101
cg26201952	-0.001437	cg10393598	-0.002191	cg11696475	-0.0004611	cg17838026	-0.003936	cg27116819	-0.001043	cg17649243	-0.001808	cg23261919	-0.006567	cg26014634	-0.002347	cg18749015	-0.003125	cg26390041	-0.00816	cg01438403	-0.004268	cg22069588	-0.005013	cg10150686	-0.005601	cg21877656	-0.003273	cg17662953	-0.0041
cg00526791	-0.001436	cg01213381	-0.00219	cg25208017	-0.000461	cg13506058	-0.003933	cg01725199	-0.001042	cg19901523	-0.001808	cg20621021	-0.006565	cg25609393	-0.002346	cg23601030	-0.003125	cg24770596	-0.008155	ch.X.153018199F	-0.004267	cg16729690	-0.00501	cg10870083	-0.005601	cg08441931	-0.00327	cg15013019	-0.004099
cg00186414	-0.001435	cg01312858	-0.00219	cg07985890	-0.0004609	cg11102611	-0.003932	cg04123409	-0.001042	cg20999912	-0.001807	cg26561413	-0.006562	cg15375239	-0.002344	cg11424456	-0.003124	cg02809401	-0.008152	cg00870849	-0.004265	cg26465214	-0.00501	cg22553641	-0.005601	cg15668468	-0.003269	cg09876101	-0.004095
cg00646492	-0.001435	cg02853703	-0.002189	cg01020421	-0.0004608	cg25453664	-0.003932	cg20621021	-0.001042	cg21287936	-0.001807	cg17200161	-0.006556	cg06422883	-0.002339	cg12259256	-0.003124	cg19673012	-0.008152	cg14119437	-0.004264	cg24770596	-0.005009	cg12920938	-0.0056	cg21131031	-0.003269	cg13695892	-0.004092
cg10012394	-0.001435	cg08196553	-0.002189	cg04609859	-0.0004607	cg16424178	-0.003929	cg23295127	-0.001042	cg04618333	-0.001806	cg26342671	-0.006556	cg10753610	-0.002339	cg22230538	-0.003124	cg03688058	-0.008149	cg24631482	-0.004263	cg04118888	-0.005008	cg11634496	-0.005598	cg24631877	-0.003269	cg18441811	-0.00409
cg11672037	-0.001435	cg12613618	-0.002189	cg13848566	-0.0004606	cg18450254	-0.003927	cg17003260	-0.001041	cg10585371	-0.001806	cg27315170	-0.006556	cg15013019	-0.002339	cg00478874	-0.003122	cg01287054	-0.008145	cg21116783	-0.004259	cg22218709	-0.005006	cg19190728	-0.005597	cg25675772	-0.003269	cg04123409	-0.004089
cg01427769	-0.001434	cg12753787	-0.002189	cg22550549	-0.0004605	cg27515800	-0.003926	cg23786580	-0.001041	cg16356456	-0.001806	cg05635754	-0.006555	cg19216198	-0.002339	cg08151731	-0.003121	cg11299991	-0.008142	cg00586317	-0.004257	cg03123370	-0.005005	cg07859439	-0.005594	cg15450139	-0.003268	cg23426816	-0.004089
cg05260062	-0.001434	cg20755721	-0.002189	cg05443922	-0.0004603	cg11342670	-0.003925	cg11723397	-0.00104	cg14443953	-0.001805	cg16729690	-0.006555	cg14776518	-0.002335	cg14771810	-0.003119	cg13348059	-0.00814	cg05700142	-0.004257	cg05318142	-0.005004	cg26061357	-0.005594	cg25439632	-0.003267	cg05802478	-0.00408
cg06478823	-0.001434	cg10385382	-0.002188	cg00165888	-0.00046	cg24638647	-0.003922	cg20222376	-0.00104	cg10703884	-0.001803	cg23588086	-0.00655	cg26170244	-0.002333	cg18128164	-0.003119	cg06361405	-0.008137	cg17817047	-0.004257	ch.X.703923F	-0.005002	cg19477977	-0.00559	cg05084827	-0.003266	cg27545407	-0.004078
cg16298760	-0.001434	cg01459807	-0.002187	cg13492692	-0.00046	cg01138981	-0.003919	cg23533683	-0.00104	cg10985914	-0.001803	cg20369204	-0.00654	cg04411841	-0.002332	cg25694349	-0.003117	cg18722247	-0.008125	cg09222023	-0.004253	cg04689061	-0.005	cg11342670	-0.005584	cg04518912	-0.003263	cg19477977	-0.004076
cg24114154	-0.001434	cg19743881	-0.002187	cg00412337	-0.0004597	cg05022306	-0.003919	cg07565540	-0.001039	cg27144115	-0.001803	cg02958634	-0.006539	cg10837843	-0.002328	cg03884592	-0.003116	cg10061342	-0.008122	cg18486102	-0.004253	cg08251901	-0.005	cg25126090	-0.005576	cg09408116	-0.003261	cg18940830	-0.004074
cg00241638	-0.001433	cg03076855	-0.002186	cg07537734	-0.0004596	cg23201812	-0.003917	cg22260952	-0.001039	cg01244650	-0.001801	cg15079315	-0.006539	cg12728517	-0.002327	cg13485564	-0.003116	cg05009684	-0.008121	cg10700424	-0.004252	cg14388195	-0.004999	cg19753794	-0.005575	cg24862483	-0.003257	cg19337852	-0.004074
cg01939336	-0.001432	cg22001496	-0.002185	cg13796823	-0.0004596	cg21024122	-0.003916	cg21158502	-0.001038	cg08996521	-0.001801	cg04618333	-0.006536	cg04651137	-0.002325	cg15577595	-0.003116	cg22853371	-0.008121	cg17184704	-0.004251	cg12081946	-0.004998	cg07220293	-0.005572	cg13981380	-0.003256	cg11165912	-0.004073
cg04109822	-0.001432	cg04640677	-0.002184	cg07392724	-0.0004595	cg20940675	-0.003914	cg25726080	-0.001038	cg16958524	-0.001801	cg20776829	-0.006532	cg16650717	-0.002325	cg19789466	-0.003116	cg24811290	-0.008121	cg10890829	-0.00425	cg23090632	-0.004998	cg13302559	-0.005566	cg26386886	-0.003256	cg15085322	-0.004073
cg09225462	-0.001432	cg08971667	-0.002184	cg13986130	-0.0004595	cg12542933	-0.003912	cg12403778	-0.001036	cg19411214	-0.001801	cg18733757	-0.006531	cg24354581	-0.002325	cg19216198	-0.003115	cg16856833	-0.008118	cg09503596	-0.004247	cg08521684	-0.004997	cg15607103	-0.005562	cg05886952	-0.003255	cg09790137	-0.00407
cg19597031	-0.001432	cg15487105	-0.002183	cg10284973	-0.0004592	cg24072311	-0.003912	cg13808674	-0.001036	cg23691090	-0.001801	cg01342196	-0.00653	cg16910830	-0.002324	cg02043070	-0.003114	cg21577472	-0.008118	cg13485564	-0.004246	cg18387085	-0.004997	cg16761581	-0.005562	cg22093805	-0.003254	cg05962325	-0.004066
cg10842095	-0.001431	cg18729886	-0.002183	cg21034023	-0.000459	cg17701886	-0.003909	cg22251569	-0.001036	cg25110126	-0.001801	cg07941983	-0.006526	cg05724997	-0.002322	cg10245915	-0.003114	cg05449136	-0.008116	cg13530621	-0.004242	cg05845319	-0.004996	cg09628838	-0.005561	cg24133569	-0.003254	cg00531750	-0.004065
cg18592561	-0.001431	cg14372701	-0.002182	cg00973286	-0.0004579	cg21256649	-0.003908	cg05769790	-0.001035	cg22156842	-0.0018	cg23967554	-0.006526	cg09476067	-0.002322	cg10682803	-0.003114	cg03623770	-0.008115	cg00274587	-0.00424	cg18617679	-0.004995	cg24165760	-0.00556	cg15993083	-0.003252	cg04846347	-0.004062
cg02560388	-0.001429	cg06693487	-0.002181	cg06081609	-0.0004579	cg10713589	-0.003906	cg09012544	-0.001035	cg12406825	-0.001799	cg07753583	-0.006524	cg13088406	-0.002322	cg17820591	-0.003113	cg22125370	-0.008114	cg06740227	-0.004239	cg23687288	-0.004992	ch.X.112118442F	-0.00556	cg12604794	-0.003251	cg02577108	-0.004061
cg05971894	-0.001429	cg07992044	-0.002181	cg11671913	-0.0004579	cg22625415	-0.003906	cg26992213	-0.001035	cg15626828	-0.001799	cg10112017	-0.006524	cg13098318	-0.002319	cg20117153	-0.003113	cg06046574	-0.008112	cg21446102	-0.004238	cg07636178	-0.004989	cg16122072	-0.005559	cg07089056	-0.003248	cg26685941	-0.004061
cg22112051	-0.001429	cg14487075	-0.002181	cg18043828	-0.0004579	cg22915582	-0.003906	cg00445997	-0.001034	cg18241829	-0.001799	cg22956254	-0.006523	cg17997279	-0.002319	cg16924337	-0.003112	cg08170757	-0.008109	cg19046725	-0.004237	cg24530116	-0.004989	cg23139609	-0.005557	cg27326687	-0.003244	cg02888113	-0.00406
cg27326452	-0.001429	cg04875162	-0.002179	cg01764082	-0.0004577	cg16086373	-0.003905	cg10226546	-0.001034	cg03177551	-0.001798	cg17987112	-0.006517	cg20621021	-0.002319	cg06463589	-0.003107	cg23531488	-0.008108	cg04313875	-0.004235	cg10949322	-0.004988	cg15153383	-0.005555	cg04174211	-0.00324	cg12038696	-0.00406
cg13496838	-0.001428	cg10317138	-0.002179	cg05156137	-0.0004575	cg00103778	-0.003903	cg13782932	-0.001034	cg03309253	-0.001798	cg10932907	-0.006515	cg04618333	-0.002318	cg17688837	-0.003106	cg22032521	-0.008107	cg27318546	-0.004235	cg23339899	-0.004988	cg22125370	-0.005547	cg23778363	-0.00324	cg15929587	-0.00406
cg00594128	-0.001427	cg17184704	-0.002179	cg13483882	-0.0004575	cg08996521	-0.003903	cg00594128	-0.001033	cg06818710	-0.001798	cg03306024	-0.006511	cg04917511	-0.002317	cg17801546	-0.003106	cg27409484	-0.008105	cg13482308	-0.004228	cg12286963	-0.004982	cg10055139	-0.005545	cg03196720	-0.003238	cg25124966	-0.00406
cg00838150	-0.001427	cg16529477	-0.002176	cg03675258	-0.0004573	cg02567488	-0.003899	cg12845520	-0.001033	cg19789653	-0.001798	cg08813925	-0.006511	cg10239098	-0.002316	cg21900495	-0.003105	cg01413582	-0.0081	cg19316148	-0.004226	cg23347429	-0.004982	cg17243364	-0.005544	cg22346581	-0.003236	cg09628838	-0.004058
cg22379207	-0.001427	cg07077694	-0.002175	cg11708616	-0.0004571	cg03935432	-0.003899	cg13541961	-0.001033	cg23563008	-0.001797	cg20555674	-0.006509	cg03884592	-0.002315	cg26615176	-0.003105	cg02323277	-0.0081	cg23791611	-0.004223	cg11380830	-0.004981	cg20956278	-0.005543	cg25720793	-0.003236	cg08241307	-0.004057
cg26133399	-0.001427	cg14515996	-0.002175	cg05592911	-0.000457	cg04416981	-0.003899	cg16368750	-0.001033	cg06346667	-0.001796	cg10536999	-0.006501	cg12973930	-0.002315	cg04066019	-0.003104	cg22606224	-0.008099	cg10948359	-0.004222	cg06913958	-0.00498	cg04568797	-0.005542	cg04152629	-0.003234	cg18486102	-0.004054
cg17407677	-0.001426	cg22451910	-0.002175	cg18866529	-0.0004567	cg20395773	-0.003899	cg16655905	-0.001033	cg13273789	-0.001796	cg13071476	-0.006492	cg03805475	-0.002314	cg12728517	-0.003103	cg12062639	-0.008096	cg20994084	-0.004222	cg04581613	-0.004978	cg07328888	-0.005542	cg23269169	-0.003234	cg14470398	-0.004051
cg02481642	-0.001425	cg00369852	-0.002174	cg14776518	-0.0004565	cg11770663	-0.003898	cg21204020	-0.001033	cg08208480	-0.001795	cg06366981	-0.006486	cg02017450	-0.002313	cg12526298	-0.003101	cg26988138	-0.008094	cg01354296	-0.004221	cg15079315	-0.004978	cg04799181	-0.005538	cg27417294	-0.003233	cg02154956	-0.00405
cg18647224	-0.001425	cg09894698	-0.002174	cg06829366	-0.0004564	cg14900388	-0.003898	cg05313771	-0.001032	cg09990962	-0.001795	cg21878650	-0.006486	cg02397720	-0.002313	cg13498778	-0.003101	cg04464940	-0.008091	cg08317263	-0.00422	cg05966978	-0.004976	cg08491125	-0.005535	cg16453560	-0.003231	cg22114489	-0.004049
cg23654971	-0.001425	cg08746900	-0.002173	cg14572967	-0.0004561	cg17130457	-0.003898	cg05952098	-0.001032	cg20203114	-0.001795	cg13038685	-0.006485	cg19457477	-0.002312	cg00893242	-0.003099	cg06412358	-0.008091	cg03993154	-0.004217	cg11491749	-0.004975	cg05810170	-0.005531	cg07616394	-0.00323	cg06576119	-0.004047
cg09278098	-0.001424	cg04728480	-0.002171	cg01361499	-0.0004559	cg04879755	-0.003896	cg07808231	-0.001032	cg25227803	-0.001795	cg22451910	-0.006485	cg23760778	-0.002312	cg05694021	-0.003097	cg08858649	-0.008086	cg11788465	-0.004217	cg14549976	-0.004974	cg10502118	-0.005531	cg18499530	-0.00323	cg10576280	-0.004047
cg01434608	-0.001423	cg16560774	-0.002171	cg13668544	-0.0004559	cg17825709	-0.003896	cg14080475	-0.001032	cg05406868	-0.001794	cg23795217	-0.006485	cg24059154	-0.002311	cg10633838	-0.003096	cg18202336	-0.008084	cg01269795	-0.004216	cg09177518	-0.004973	cg04465078	-0.00553	cg01383890	-0.003229	cg23062810	-0.004047
cg07067241	-0.001423	cg02527669	-0.00217	cg26657240	-0.0004559	cg13411656	-0.003895	cg22451910	-0.001032	cg14002345	-0.001794	cg00773413	-0.006484	cg00255142	-0.00231	cg12081946	-0.003096	cg11444704	-0.008079	cg24757310	-0.004216	cg11728578	-0.004972	cg09238801	-0.005518	cg02560388	-0.003228	cg10406027	-0.004046
cg19015951	-0.001423	cg07778029	-0.00217	cg02161478	-0.0004558	cg10806140	-0.003894	cg12038696	-0.001031	cg26437123	-0.001794	cg11033617	-0.00648	cg09740037	-0.002309	cg19000879	-0.003095	cg02725123	-0.008075	cg06419432	-0.004215	cg17299456	-0.004972	cg17349081	-0.005517	cg03113502	-0.003228	cg05284480	-0.004044
cg03483267	-0.001422	cg10626816	-0.002169	cg11571263	-0.0004558	cg22349573	-0.003894	cg12583095	-0.001031	cg11081723	-0.001793	cg26027170	-0.00648	cg24064264	-0.002308	cg27533237	-0.003095	cg16398956	-0.008074	cg17083560	-0.004214	cg04144394	-0.004965	cg20776829	-0.005517	cg26127778	-0.003228	cg06667063	-0.004044
cg09328349	-0.001422	cg02408775	-0.002168	cg11836236	-0.0004556	cg14219290	-0.003893	cg12693595	-0.001031	cg12624829	-0.001793	cg16560774	-0.006476	cg03638795	-0.002307	cg15225091	-0.003094	cg16668394	-0.008073	cg11342670	-0.004213	cg13847070	-0.004962	cg00325866	-0.005516	cg09137533	-0.003227	cg18655657	-0.004044
cg16430572	-0.001422	cg01636650	-0.002167	cg03884592	-0.0004554	cg10308137	-0.003892	cg25131544	-0.00103	cg21172377	-0.001793	cg01823541	-0.006475	cg10925082	-0.002307	cg05822532	-0.003092	cg10976172	-0.008072	cg02408775	-0.004211	cg24567694	-0.004962	cg14317609	-0.005514	cg10877050	-0.003227	cg09108797	-0.004043
cg05643303	-0.001421	cg26113448	-0.002167	cg18049030	-0.0004553	cg10111450	-0.00389	cg27627209	-0.00103	cg27484412	-0.001793	cg04908588	-0.006472	cg04109822	-0.002306	cg01272707	-0.003091	cg04127825	-0.00807	cg14305711	-0.004209	ch.X.42405548R	-0.004962	cg22112051	-0.005514	cg12169536	-0.003227	cg09379627	-0.004041
cg16521978	-0.001421	cg26846424	-0.002164	cg04009887	-0.0004552	cg02981877	-0.003887	cg00496025	-0.001029	cg00294109	-0.001792	cg05019826	-0.006472	cg23739746	-0.002306	cg13606889	-0.003091	cg25599475	-0.008068	cg19762657	-0.004205	cg15488194	-0.004961	cg03762483	-0.005513	cg12685753	-0.003227	cg20217702	-0.004041
cg10035294	-0.00142	cg13510327	-0.002163	cg07431286	-0.0004552	cg10701282	-0.003887	cg07219667	-0.001029	cg02942008	-0.001792	cg10700424	-0.00647	cg12624829	-0.002305	cg23884531	-0.00309	cg06662568	-0.008061	cg08999915	-0.004204	cg00599559	-0.00496	cg11558474	-0.005509	cg02096916	-0.003224	cg21515898	-0.004041
cg21784498	-0.00142	cg20996682	-0.002163	cg01783662	-0.0004551	cg08676905	-0.003885	cg12224633	-0.001029	cg13299776	-0.001792	cg05156137	-0.006469	cg14950169	-0.002303	cg04152629	-0.003086	cg02934221	-0.008059	cg11482422	-0.004203	cg18441811	-0.004959	cg21603914	-0.005509	cg16655905	-0.003223	cg25564800	-0.004041
cg21266502	-0.001419	cg19049607	-0.002162	cg00765922	-0.000455	cg15484988	-0.003883	cg20340508	-0.001029	cg22114489	-0.001792	cg03922748	-0.006468	cg15575671	-0.002303	cg05038216	-0.003083	cg07722358	-0.008059	cg08787401	-0.004202	cg02214414	-0.004957	cg16712664	-0.005508	cg24488739	-0.00322	ch.X.56864533F	-0.00404
cg27458485	-0.001419	cg04009887	-0.002161	cg08286012	-0.000455	cg09693106	-0.003878	cg27494383	-0.001029	cg22517836	-0.001792	cg16326242	-0.006458	cg26195178	-0.002302	cg24875854	-0.003083	cg22827124	-0.008053	cg16339264	-0.004201	cg06143979	-0.004957	cg26342671	-0.005506	cg25851152	-0.00322	cg27353361	-0.004038
cg26376245	-0.001418	cg05299486	-0.002161	cg00186414	-0.0004549	cg13888838	-0.003878	cg05443922	-0.001028	cg24059154	-0.001792	cg26988617	-0.006452	cg08317263	-0.0023	cg26676559	-0.003083	cg11387340	-0.008052	cg05061711	-0.0042	cg00145177	-0.004955	cg20801464	-0.005504	cg10585371	-0.003217	cg06869532	-0.004037
cg00329697	-0.001417	cg04663932	-0.002159	cg09135016	-0.0004549	cg07161172	-0.003877	cg12590051	-0.001028	cg11843799	-0.001791	cg03108070	-0.006449	cg14120010	-0.0023	cg03075709	-0.003082	cg12030002	-0.008049	cg10521638	-0.0042	cg16762778	-0.004954	cg18042593	-0.005503	cg02788637	-0.003216	cg16703914	-0.004037
cg03698009	-0.001417	cg24845848	-0.002159	cg15890754	-0.0004549	cg04113075	-0.003875	cg20169506	-0.001028	cg06299833	-0.00179	cg04896381	-0.006448	cg24349631	-0.0023	cg27619475	-0.003082	cg11380830	-0.008048	cg13029706	-0.004198	cg21158502	-0.004954	cg09792711	-0.005501	cg15260466	-0.003215	cg04880751	-0.004033
cg04808029	-0.001417	cg13580286	-0.002157	cg19725343	-0.0004548	cg17087669	-0.003875	cg23232844	-0.001028	cg23273694	-0.00179	cg26189983	-0.006448	cg24724633	-0.0023	cg03401096	-0.003081	cg08194009	-0.008047	cg17104258	-0.004198	cg18453446	-0.004953	cg18531146	-0.005501	cg16704958	-0.003214	cg19672993	-0.004032
cg22156700	-0.001417	cg05406868	-0.002156	cg15744359	-0.0004543	cg23446109	-0.003874	cg26127778	-0.001028	ch.X.223217F	-0.00179	cg01043119	-0.006447	cg03213374	-0.002299	cg12209075	-0.003081	cg09888920	-0.008047	cg13425637	-0.004197	cg18571112	-0.00495	cg24217844	-0.005499	cg07668993	-0.003213	cg23164459	-0.004032
cg23806715	-0.001417	cg09009111	-0.002156	cg10239098	-0.0004542	cg07231544	-0.003873	cg15202245	-0.001027	cg04917511	-0.001789	cg00531628	-0.006445	cg05769790	-0.002299	cg23922454	-0.003081	cg00753492	-0.008042	cg00096536	-0.004196	cg24830619	-0.004949	cg24685006	-0.005498	cg24395801	-0.003213	cg21684411	-0.004031
cg26846424	-0.001417	cg16342115	-0.002156	cg09252999	-0.0004541	cg11207300	-0.003869	cg19120897	-0.001027	cg09584521	-0.001789	cg27127903	-0.006443	cg25587069	-0.002296	cg06952660	-0.00308	cg01777403	-0.008042	cg18892808	-0.004196	cg02888113	-0.004945	cg07158808	-0.005497	cg25110126	-0.003212	cg04742719	-0.004029
cg00632466	-0.001415	cg24724633	-0.002156	cg15089487	-0.0004541	cg03476007	-0.003868	cg22374485	-0.001027	cg12373208	-0.001789	cg09736669	-0.006442	cg27279991	-0.002296	cg20902958	-0.00308	cg23691090	-0.008035	cg08325519	-0.004195	cg24374161	-0.004945	cg13442428	-0.005493	cg02214414	-0.003207	cg14822966	-0.004029
cg02387679	-0.001415	cg13543854	-0.002155	cg02407720	-0.0004537	cg18228456	-0.003868	cg03638795	-0.001026	cg02390319	-0.001788	cg22853371	-0.006442	cg12577010	-0.002293	cg12361223	-0.003079	cg08190044	-0.008033	cg01981762	-0.004194	cg14022057	-0.004944	cg01434608	-0.005492	cg16750845	-0.003207	cg07095783	-0.004028
cg03839949	-0.001415	cg20643952	-0.002155	cg09222023	-0.0004536	cg20222376	-0.003867	cg09269620	-0.001026	cg18967846	-0.001788	cg14275842	-0.006438	cg08129312	-0.002292	cg12897947	-0.003079	cg24967096	-0.008033	cg14563196	-0.004193	cg17891011	-0.004943	cg06143979	-0.00549	cg27138204	-0.003207	cg06134410	-0.004026
cg17406148	-0.001415	cg15079315	-0.002154	cg09009111	-0.0004535	cg26472118	-0.003867	cg25575553	-0.001026	cg23039580	-0.001788	cg14376467	-0.006438	cg22782986	-0.002292	cg01950845	-0.003076	ch.X.2058079F	-0.008032	cg01802640	-0.004192	cg11558474	-0.004942	cg14034852	-0.005489	cg17618595	-0.003206	cg24144853	-0.004021
cg17420659	-0.001415	ch.X.112118442F	-0.002154	cg05221664	-0.0004533	cg07012770	-0.003864	cg11067013	-0.001025	cg07850604	-0.001787	cg03143164	-0.006436	cg11723397	-0.002291	cg19422030	-0.003075	cg13475583	-0.008031	cg25012577	-0.00419	cg12134570	-0.004939	cg24354581	-0.005489	cg10987597	-0.003205	cg02619205	-0.00402
cg18708013	-0.001415	cg23930334	-0.002153	cg17633234	-0.0004532	cg15811668	-0.003864	cg01138981	-0.001024	cg02531479	-0.001786	cg06069616	-0.006431	cg23450938	-0.002291	cg20721917	-0.003075	cg05469346	-0.008029	cg08750440	-0.004189	cg24487027	-0.004939	cg01645729	-0.005486	cg18439358	-0.003205	cg06487301	-0.004019
cg00578252	-0.001414	cg26096837	-0.002153	cg22289831	-0.000453	cg00262446	-0.003863	cg03476007	-0.001024	cg13828839	-0.001786	cg25172604	-0.006428	cg12427321	-0.002289	cg24830619	-0.003075	cg21212139	-0.008028	cg23572376	-0.004189	cg00887511	-0.004932	cg09522018	-0.005484	cg16424178	-0.003203	cg08505560	-0.004019
cg10316989	-0.001414	cg24922129	-0.002151	cg25316769	-0.0004527	cg00655552	-0.003859	cg12090740	-0.001024	cg26396443	-0.001786	cg18881873	-0.006427	cg15778012	-0.002289	cg25737323	-0.003072	cg01461199	-0.008025	cg13084458	-0.004188	cg02219997	-0.00493	cg00531750	-0.005483	cg10406027	-0.003202	cg10985914	-0.004018
cg01509464	-0.001413	cg27649073	-0.002151	cg06740227	-0.0004525	cg03348475	-0.003859	cg13805537	-0.001024	cg07028533	-0.001785	cg05700142	-0.006426	cg20066750	-0.002287	cg06023791	-0.003071	cg26796190	-0.008017	cg08331313	-0.004184	cg05839377	-0.00493	cg16661000	-0.005482	cg14675361	-0.003202	cg20869673	-0.004018
cg09929564	-0.001412	cg06633429	-0.00215	cg09486861	-0.0004525	cg02339392	-0.003858	cg23725454	-0.001024	cg19450111	-0.001785	cg10753610	-0.006426	cg09017941	-0.002286	cg13795448	-0.003071	cg27317433	-0.008017	cg14982203	-0.004184	cg25983553	-0.00493	cg07431229	-0.005481	cg24709703	-0.003202	cg10169869	-0.004013
cg10317138	-0.001411	cg02712036	-0.002149	cg14487075	-0.0004525	cg14755831	-0.003854	cg03247389	-0.001023	cg26916780	-0.001785	cg14317609	-0.006426	cg27458485	-0.002286	cg08284213	-0.00307	cg26069514	-0.008016	cg01449818	-0.004183	ch.X.1639000R	-0.00493	cg03270395	-0.00548	cg27139956	-0.0032	cg21902544	-0.004013
cg11203397	-0.001411	cg25890168	-0.002149	cg23179456	-0.0004525	cg16291276	-0.003849	cg09357438	-0.001023	cg02506867	-0.001784	cg23521140	-0.006426	cg18192294	-0.002285	cg10932907	-0.00307	cg04160501	-0.008015	cg00049440	-0.004182	cg06334284	-0.004929	cg26686147	-0.005479	cg03762483	-0.003199	cg05432848	-0.004012
cg12800244	-0.001411	cg03854765	-0.002148	cg11723397	-0.000452	cg01999158	-0.003844	cg11500660	-0.001023	cg21323441	-0.001783	cg04956511	-0.006425	cg00218103	-0.002284	cg07333046	-0.003068	cg18796523	-0.008012	cg24797187	-0.004181	cg00738869	-0.004927	cg12610207	-0.005478	cg13381718	-0.003199	cg04329105	-0.004011
cg19763461	-0.001411	cg20173059	-0.002148	cg11879741	-0.0004517	cg23457862	-0.003843	cg13951572	-0.001023	cg08573893	-0.001781	cg08218061	-0.006425	cg22859679	-0.002284	cg27484412	-0.003068	cg13437593	-0.00801	cg00145177	-0.004179	cg09993119	-0.004927	cg14166485	-0.005474	cg21602557	-0.003199	cg06693487	-0.004009
cg22260952	-0.001411	cg00314771	-0.002144	cg12155547	-0.0004517	cg19383430	-0.003841	cg16018211	-0.001023	cg18652721	-0.00178	cg27657333	-0.006425	ch.X.97651759F	-0.002284	cg08572016	-0.003067	cg01016521	-0.008008	cg20703240	-0.004176	cg12526834	-0.004923	cg24559983	-0.005472	cg08533745	-0.003197	cg26827987	-0.004008
cg00906319	-0.00141	cg03177551	-0.002144	cg07333046	-0.0004514	ch.X.1667329F	-0.003841	cg19961480	-0.001023	cg15314890	-0.001779	cg00405699	-0.006417	cg13908336	-0.002283	cg09299055	-0.003067	cg15802555	-0.008008	cg23089549	-0.004175	cg00262446	-0.004922	cg13908336	-0.005471	cg01775044	-0.003196	cg07039423	-0.004007
cg24845848	-0.001409	cg17552333	-0.002144	cg15013019	-0.0004514	cg05797854	-0.003835	cg25609393	-0.001022	cg19258034	-0.001779	cg25859998	-0.006414	cg23654971	-0.002283	cg11570367	-0.003067	cg01269795	-0.008007	cg24671939	-0.004175	cg21210224	-0.004921	cg15768556	-0.00547	cg02057833	-0.003196	cg17077639	-0.004006
cg06305340	-0.001408	cg09551472	-0.002143	cg08262220	-0.0004513	cg23418208	-0.003833	cg06103243	-0.001021	cg15556943	-0.001778	cg12245996	-0.006412	cg03744197	-0.002282	cg14830371	-0.003067	cg11786870	-0.008006	cg04175895	-0.004174	cg09366620	-0.00492	cg20943039	-0.00547	cg07531860	-0.003196	cg13797825	-0.004004
cg10951873	-0.001408	cg15236528	-0.002143	cg06409432	-0.0004512	cg18261069	-0.003831	cg10576725	-0.001021	cg21475097	-0.001778	cg18261069	-0.006411	cg08230658	-0.002282	cg04120428	-0.003066	cg08416723	-0.008002	cg23583920	-0.004171	cg08110488	-0.004918	cg24410214	-0.00547	cg24961583	-0.003196	cg21370527	-0.004003
cg25761326	-0.001408	cg17040303	-0.002143	cg23470850	-0.0004512	cg25532501	-0.00383	cg12177743	-0.001021	cg14714537	-0.001777	cg03747456	-0.006406	cg08578245	-0.002282	cg14930642	-0.003066	cg11762018	-0.007986	cg23967554	-0.004168	cg10245915	-0.004911	cg20434825	-0.005469	cg11018337	-0.003193	cg08711067	-0.004002
cg03401266	-0.001407	cg18247638	-0.002143	cg10543450	-0.000451	cg24308560	-0.003828	cg17067190	-0.001021	cg19323951	-0.001777	cg13707951	-0.006404	cg10400652	-0.002282	cg20643952	-0.003066	cg14823389	-0.007984	cg15124109	-0.004167	cg02085210	-0.00491	cg09809276	-0.005465	cg18042593	-0.003193	cg21731345	-0.004002
cg04018288	-0.001407	cg13437593	-0.002142	cg02097309	-0.0004506	cg01070078	-0.003827	cg02672530	-0.00102	cg23564243	-0.001777	cg17025142	-0.006404	cg12036735	-0.002282	cg15079315	-0.003064	cg03901257	-0.007982	cg15162330	-0.004166	cg10923346	-0.00491	cg12014333	-0.005464	cg25890168	-0.003192	cg27326452	-0.004002
cg09222422	-0.001407	cg18389933	-0.002141	cg13957126	-0.0004506	cg22156700	-0.003827	cg09029902	-0.001019	ch.X.92543860F	-0.001777	cg23009123	-0.006401	cg12169977	-0.002282	cg01751134	-0.003059	cg06861572	-0.007982	cg19515245	-0.004166	cg21741562	-0.004907	cg02052895	-0.005463	cg15032239	-0.003191	cg03643998	-0.004
cg12373084	-0.001407	cg25456477	-0.00214	cg16716750	-0.0004505	cg27460943	-0.003827	cg16846653	-0.001019	cg12478384	-0.001776	cg05867154	-0.006395	cg17956079	-0.002281	cg06889746	-0.003058	cg02741554	-0.007981	cg21109167	-0.004165	cg17153122	-0.004906	cg02685990	-0.005463	cg17732044	-0.003191	cg23922454	-0.004
cg26127778	-0.001407	cg26220773	-0.00214	cg01797371	-0.0004504	cg01055871	-0.003826	cg20660171	-0.001019	cg18853490	-0.001775	cg25131544	-0.006392	cg22193385	-0.002281	cg07110659	-0.003058	cg06718763	-0.007979	cg25203031	-0.004165	cg26728709	-0.004905	cg09874289	-0.005459	cg07046575	-0.00319	cg27406919	-0.004
cg12448724	-0.001406	cg07627639	-0.002138	cg21699330	-0.0004502	cg14170545	-0.003826	cg23564243	-0.001019	cg22734086	-0.001774	cg02925367	-0.006391	cg23615676	-0.002281	cg05493394	-0.003056	cg13038685	-0.007977	cg05672912	-0.004164	cg10511249	-0.004903	cg16681130	-0.005456	cg26102065	-0.003189	cg14049461	-0.003996
cg15632839	-0.001406	cg21861151	-0.002138	cg16086373	-0.00045	cg02427330	-0.003824	cg08555612	-0.001018	cg05060949	-0.001773	cg08680048	-0.00639	cg09858237	-0.00228	cg23671997	-0.003056	cg03998173	-0.007976	cg14351425	-0.004161	cg17965712	-0.004901	cg13695892	-0.005455	cg09284066	-0.003187	cg18076766	-0.003996
cg20556936	-0.001405	cg01951947	-0.002136	cg21726284	-0.00045	cg16667631	-0.003823	cg10890829	-0.001018	cg07582157	-0.001771	cg06882298	-0.006389	cg00971050	-0.002278	cg24901042	-0.003056	cg10166205	-0.007976	cg00097626	-0.00416	cg00778807	-0.004899	cg25125453	-0.005455	cg10701282	-0.003185	cg13838014	-0.003995
cg24155429	-0.001405	cg24155190	-0.002136	cg00674304	-0.0004497	cg19381811	-0.003823	cg16455791	-0.001018	cg11387340	-0.001771	cg00500522	-0.006388	cg10498429	-0.002278	cg00573330	-0.003055	cg05960677	-0.007974	cg20133730	-0.004151	cg14900388	-0.004895	cg12134570	-0.005454	cg02193762	-0.003184	cg22753340	-0.003993
cg10393598	-0.001404	cg24865623	-0.002136	cg04113075	-0.0004496	cg23615676	-0.003821	cg22016779	-0.001018	cg17996329	-0.001771	cg05592959	-0.006387	cg07951978	-0.002277	cg05802478	-0.003055	cg17381565	-0.007974	cg17775621	-0.00415	cg16356456	-0.004893	cg27626102	-0.005454	cg11671265	-0.003183	cg00870849	-0.003992
cg16288248	-0.001404	cg05293738	-0.002135	cg03716591	-0.0004495	cg24759337	-0.003821	cg25749267	-0.001018	cg13432616	-0.00177	cg20933634	-0.006384	cg00563873	-0.002275	cg17346857	-0.003055	cg16561266	-0.007971	cg24583855	-0.004149	cg01116067	-0.00489	cg26666107	-0.005453	cg12741255	-0.003183	cg21235151	-0.003991
cg25093503	-0.001404	cg27515369	-0.002135	cg26189983	-0.0004495	cg18566883	-0.003818	cg15414833	-0.001017	cg05221664	-0.001769	cg25389463	-0.006384	cg14425257	-0.002274	ch.X.57019131F	-0.003055	cg25110734	-0.007971	cg02214414	-0.004148	cg04880618	-0.004886	cg20768638	-0.005451	cg14774117	-0.003182	cg21877656	-0.003988
cg16909109	-0.001403	ch.X.2195099F	-0.002135	cg04932056	-0.0004493	cg21933859	-0.003817	cg27406919	-0.001017	cg00498591	-0.001768	cg00981594	-0.006383	cg10099799	-0.002272	cg25116125	-0.003054	cg07442907	-0.00797	cg00306298	-0.004147	cg12800244	-0.004886	cg06069616	-0.005447	cg13623135	-0.003181	cg05038466	-0.003987
cg20643952	-0.001403	cg00470794	-0.002133	cg15718833	-0.0004493	cg25475056	-0.003816	cg03093806	-0.001016	cg03065202	-0.001768	cg24887140	-0.006383	cg11764966	-0.002272	cg05462761	-0.003052	cg14864103	-0.00797	cg00473462	-0.004147	cg00282704	-0.004885	cg15862165	-0.005444	cg13355041	-0.003179	cg17186066	-0.003986
cg26096837	-0.001403	cg07985890	-0.002133	cg16855845	-0.0004488	cg03958038	-0.003813	cg04138112	-0.001016	cg25513173	-0.001767	cg07652350	-0.006382	cg12753787	-0.002271	cg26457761	-0.003052	cg18531146	-0.007963	cg09672358	-0.004147	cg09276998	-0.004885	cg17511968	-0.005444	cg09704750	-0.003178	cg12266841	-0.003985
cg00350885	-0.001402	cg25062797	-0.002133	cg04619627	-0.0004486	cg12689375	-0.003813	cg06633429	-0.001016	cg13808674	-0.001766	cg17892169	-0.006381	cg04596060	-0.002269	cg08799922	-0.00305	cg04797323	-0.007957	cg16501625	-0.004146	cg09398924	-0.004884	cg18142162	-0.005444	cg14864103	-0.003178	cg15147435	-0.003983
cg17916916	-0.001401	cg00700007	-0.002132	cg22758697	-0.0004486	cg18094907	-0.003812	cg13572892	-0.001016	cg22289831	-0.001766	cg25287071	-0.006381	cg09278098	-0.002269	cg11236550	-0.00305	cg21573047	-0.007956	cg11569486	-0.004145	cg19570545	-0.004884	ch.X.92435715F	-0.005444	cg07995570	-0.003177	cg15878568	-0.003983
cg07382923	-0.0014	cg00268086	-0.002131	cg07408456	-0.0004481	cg15822795	-0.00381	cg16293631	-0.001016	cg17934367	-0.001764	cg00952516	-0.006378	cg06731639	-0.002267	cg18967534	-0.003048	cg26301565	-0.007955	cg22460206	-0.004144	cg20893203	-0.004883	cg04917511	-0.00544	cg17305834	-0.003176	cg26988138	-0.003983
cg26371771	-0.0014	cg19301632	-0.002131	cg04846710	-0.000448	cg22958957	-0.003809	cg06413398	-0.001015	cg01130792	-0.001763	cg24410214	-0.006376	cg12020639	-0.002267	cg23365482	-0.003046	cg04964062	-0.007954	cg11382133	-0.004143	cg24349631	-0.004881	cg02621151	-0.005439	cg19397128	-0.003176	cg04718845	-0.003982
cg06654905	-0.001398	cg24913868	-0.002131	cg06029700	-0.000448	cg12604794	-0.003807	cg18419977	-0.001015	cg13919466	-0.001763	cg08872722	-0.006374	cg17768957	-0.002265	cg25750228	-0.003044	cg21054473	-0.007954	cg04464940	-0.004141	cg07254821	-0.004879	cg22349506	-0.005438	cg23967554	-0.003175	cg07174665	-0.003981
cg11674865	-0.001398	cg05573381	-0.00213	cg13357602	-0.0004479	cg11380830	-0.003806	cg23139609	-0.001015	cg15833534	-0.001763	cg24280645	-0.006372	cg18474180	-0.002265	cg24348240	-0.003043	cg23089549	-0.007954	cg17480467	-0.004141	cg04138112	-0.004877	cg04160501	-0.005436	cg27499820	-0.003175	cg16252933	-0.003981
cg11948456	-0.001398	cg15414833	-0.00213	cg09469667	-0.0004476	cg11382133	-0.003806	cg03366925	-0.001014	cg25741023	-0.001761	cg11879741	-0.006369	cg24698536	-0.002265	cg19400725	-0.003042	cg24154161	-0.007946	cg00344443	-0.00414	cg08551615	-0.004877	cg09440812	-0.005432	cg02045355	-0.003172	cg24935042	-0.003981
cg13491644	-0.001398	cg15748490	-0.00213	cg27347290	-0.0004476	cg11554266	-0.003805	cg14919554	-0.001014	cg25868286	-0.001761	cg17186727	-0.006365	cg09680447	-0.002264	cg00306298	-0.003041	cg21064080	-0.007943	cg04127825	-0.00414	cg02331902	-0.004874	cg01359246	-0.005431	cg23404012	-0.003172	cg02001279	-0.00398
cg16455791	-0.001398	cg25969122	-0.00213	cg13991233	-0.0004474	cg00804078	-0.003804	cg19157329	-0.001014	cg27202913	-0.001761	cg08194009	-0.006362	cg21803959	-0.002264	cg11879741	-0.003039	cg00662647	-0.007941	cg08604594	-0.00414	cg07215504	-0.004874	cg09993119	-0.00543	cg19570545	-0.003171	cg14219290	-0.00398
cg04452959	-0.001397	cg09941112	-0.002129	cg24191463	-0.0004474	cg04581938	-0.003804	cg18910298	-0.001013	cg16978914	-0.00176	cg04032226	-0.006358	cg04123409	-0.002263	cg06118384	-0.003038	cg03355101	-0.007936	cg09042952	-0.004139	cg04581938	-0.004873	cg12105450	-0.00543	cg21076702	-0.00317	cg06657243	-0.003979
cg07286881	-0.001397	cg04618333	-0.002126	cg05942128	-0.0004472	cg15124109	-0.003803	cg08199953	-0.001012	cg14506834	-0.001759	cg13805537	-0.006358	cg03289872	-0.002261	cg07381000	-0.003037	cg22538396	-0.007929	cg12105450	-0.004139	cg06103394	-0.004873	cg15375239	-0.005427	cg22108259	-0.003169	cg23736843	-0.003979
cg10899301	-0.001397	cg06740227	-0.002126	cg26332926	-0.0004472	cg14874351	-0.003801	cg01817464	-0.001011	cg19241689	-0.001759	cg21212139	-0.006355	cg14956327	-0.00226	cg07546255	-0.003037	cg04127044	-0.007928	cg26150462	-0.004137	cg17463149	-0.004873	cg21844450	-0.005425	cg25716286	-0.003169	cg08727535	-0.003978
cg17996329	-0.001396	cg09467501	-0.002126	cg03596280	-0.000447	cg13919466	-0.003798	cg06012574	-0.001011	cg23615676	-0.001759	cg05962325	-0.006354	cg02097309	-0.002259	cg16843689	-0.003036	cg01234063	-0.007926	cg20342628	-0.004136	cg06980547	-0.004872	cg00997424	-0.005423	cg20691722	-0.003168	cg09555914	-0.003978
cg25831204	-0.001396	cg06654905	-0.002124	cg13016314	-0.000447	cg14776518	-0.003798	cg07944798	-0.001011	cg01889143	-0.001758	cg13153394	-0.006354	cg11121623	-0.002259	cg09411730	-0.003035	cg11033617	-0.007926	cg02401399	-0.004135	cg04249706	-0.00487	cg09808176	-0.005421	cg12155676	-0.003167	cg22237401	-0.003978
cg01764198	-0.001395	cg08420572	-0.002124	cg08774368	-0.0004469	cg26916780	-0.003797	cg09994323	-0.001011	cg13028700	-0.001758	cg27448161	-0.006352	cg08573893	-0.002258	cg06069616	-0.003034	cg05839377	-0.007925	cg00043095	-0.004134	cg00981594	-0.004861	cg00523742	-0.005419	cg01273287	-0.003166	cg25979598	-0.003977
cg05494069	-0.001395	cg09693811	-0.002124	cg26911220	-0.0004469	cg11158729	-0.003795	cg12530994	-0.001011	cg14210607	-0.001758	cg02632185	-0.006351	cg03075709	-0.002257	cg20495404	-0.003034	cg10414229	-0.007924	cg02323277	-0.004133	cg02427330	-0.004861	cg19487718	-0.005418	cg23361368	-0.003165	cg08325519	-0.003975
cg19783626	-0.001395	cg23244022	-0.002124	cg21263122	-0.0004466	cg15459780	-0.003795	cg13141192	-0.001011	cg22863920	-0.001758	cg07265541	-0.006348	cg15298486	-0.002256	cg15729404	-0.003033	cg17475456	-0.007924	cg00117172	-0.00413	cg24548833	-0.004861	cg08702344	-0.005416	cg12036292	-0.003161	cg06046574	-0.003974
cg04589027	-0.001394	cg10416527	-0.002123	cg24097797	-0.0004465	cg02218809	-0.003794	cg14710552	-0.001011	cg03552658	-0.001757	cg03638795	-0.006346	cg20117153	-0.002255	cg07393734	-0.003032	cg22409276	-0.007924	cg09599130	-0.004128	cg02621151	-0.004859	cg26827987	-0.005416	cg17296588	-0.003161	cg05839377	-0.003972
cg09573359	-0.001394	cg10457563	-0.002123	cg11299264	-0.0004462	cg05469346	-0.003794	cg24932686	-0.001011	cg26233914	-0.001757	ch.X.1023208F	-0.006345	cg27085741	-0.002254	cg07382923	-0.003031	cg07365127	-0.007921	cg13847070	-0.004126	cg12427321	-0.004859	cg14219290	-0.005408	cg27659622	-0.003161	cg23051664	-0.003971
cg17603206	-0.001393	cg11469061	-0.002123	cg19672993	-0.0004461	cg12868173	-0.003793	cg18422875	-0.00101	cg14037440	-0.001756	cg01636650	-0.006343	cg04742550	-0.002253	cg01269795	-0.00303	cg01202265	-0.00792	cg02632185	-0.004125	cg16501625	-0.004859	cg22081371	-0.005406	cg13847066	-0.003159	ch.X.223217F	-0.003968
cg04581938	-0.001392	cg13382769	-0.002123	cg07215504	-0.000446	cg04791477	-0.003792	cg00738869	-0.001009	cg23346544	-0.001756	cg24139898	-0.006343	cg13215970	-0.002253	cg05673882	-0.003027	cg06118384	-0.007919	cg09975039	-0.004125	cg24059154	-0.004858	cg08470180	-0.005404	cg03855710	-0.003158	cg06794581	-0.003967
cg14248715	-0.001392	cg14775296	-0.002123	cg09464137	-0.000446	cg23298160	-0.003792	cg02509058	-0.001009	cg04932056	-0.001755	cg05314679	-0.006341	cg15668468	-0.002252	cg09130077	-0.003025	cg08272572	-0.007916	cg23989673	-0.004119	cg00606464	-0.004857	cg04829853	-0.005403	cg05864433	-0.003157	cg12352038	-0.003967
cg23999695	-0.001392	cg03839949	-0.002121	cg20198242	-0.0004459	cg20863963	-0.003789	cg18256790	-0.001009	cg11414821	-0.001755	cg26577201	-0.006338	cg04564030	-0.002251	cg11731221	-0.003025	cg05759347	-0.007914	cg14426428	-0.004112	cg06383124	-0.004857	cg08751352	-0.005397	cg06413398	-0.003157	cg21091985	-0.003966
cg13995427	-0.001391	cg22915582	-0.00212	cg06069616	-0.0004458	cg03359508	-0.003784	cg21323441	-0.001009	cg19493077	-0.001754	cg10713589	-0.006336	cg22260952	-0.002251	cg03716591	-0.003023	cg07633853	-0.007914	cg18749015	-0.004112	cg01354296	-0.004856	cg02788637	-0.005396	cg25673948	-0.003157	cg26818165	-0.003965
cg14400292	-0.001391	cg24593272	-0.002119	cg06565620	-0.0004456	cg10148280	-0.003784	cg05061711	-0.001008	cg21111868	-0.001754	cg12036735	-0.006336	cg07282058	-0.002248	cg14409958	-0.003023	cg20433906	-0.007914	cg12594569	-0.004109	cg06993041	-0.004856	cg15043720	-0.005396	cg27513574	-0.003157	cg04118888	-0.003962
cg03416628	-0.00139	cg20552487	-0.002118	cg26493353	-0.0004456	cg02043070	-0.003783	cg06329345	-0.001008	cg25287071	-0.001754	cg12690127	-0.006335	cg21992238	-0.002248	cg17776267	-0.003022	cg24535130	-0.007912	cg21238414	-0.004108	ch.X.1031144F	-0.004853	cg03197500	-0.005395	cg15534084	-0.003156	cg24968786	-0.003961
cg16034881	-0.00139	cg04100595	-0.002117	cg25453664	-0.0004455	cg04432742	-0.003783	cg09524396	-0.001008	cg25491558	-0.001754	cg05026135	-0.006333	cg25682097	-0.002248	cg06621373	-0.003017	cg03536654	-0.00791	cg26920902	-0.004107	cg22793735	-0.004852	cg20877313	-0.005393	cg03584113	-0.003155	cg24364564	-0.003959
cg02020829	-0.001389	cg07137955	-0.002117	cg13797825	-0.0004454	cg25495685	-0.003783	cg19519331	-0.001008	cg16763885	-0.001752	cg15650509	-0.006333	cg07985890	-0.002247	cg10714639	-0.003017	cg13504993	-0.007905	cg00083262	-0.004105	cg23531488	-0.00485	cg10633838	-0.005392	cg07688416	-0.003155	cg27347290	-0.003959
cg10838789	-0.001389	cg09411730	-0.002117	cg06891716	-0.0004453	cg12155547	-0.003781	cg23244559	-0.001007	cg20943461	-0.001752	cg04144394	-0.006329	cg20222376	-0.002247	cg10935762	-0.003017	cg25124966	-0.007904	cg25124966	-0.004103	cg09777344	-0.004848	cg16411256	-0.005389	cg04682088	-0.003154	cg10532362	-0.003957
cg25681618	-0.001389	cg15493051	-0.002117	cg03315007	-0.0004452	cg16716750	-0.003781	cg03094193	-0.001006	cg24155190	-0.001752	cg02619205	-0.006328	cg21430685	-0.002247	cg26303165	-0.003015	cg22589161	-0.007903	cg11260715	-0.004102	cg23907053	-0.004844	cg16438210	-0.005387	cg10673740	-0.003153	cg20464804	-0.003957
cg26301565	-0.001389	cg21357629	-0.002117	cg09344183	-0.0004452	cg26796190	-0.003781	cg13543854	-0.001006	cg01422262	-0.001751	cg16411256	-0.006327	cg07471461	-0.002246	cg17266282	-0.003013	cg09704750	-0.007902	cg04301104	-0.004098	cg07392085	-0.004843	cg14049461	-0.005384	cg00241638	-0.003152	cg04581938	-0.003952
cg05490659	-0.001388	cg04143750	-0.002116	cg17186727	-0.000445	cg13283691	-0.00378	cg14860120	-0.001005	cg07565540	-0.001751	cg00186909	-0.006324	cg24410214	-0.002246	cg20901246	-0.003013	cg06413398	-0.007896	cg06034127	-0.004097	cg10150686	-0.004843	cg04201750	-0.005382	cg01240795	-0.003152	cg08814105	-0.003947
cg14293864	-0.001388	cg05584950	-0.002115	cg23174932	-0.0004449	cg18447772	-0.00378	cg18148130	-0.001005	cg14074581	-0.001751	cg03289416	-0.006323	cg04907257	-0.002245	cg03747456	-0.003011	cg05061711	-0.00789	cg16729690	-0.004097	cg19868593	-0.004837	cg00938619	-0.005381	cg22256433	-0.003152	cg25219134	-0.003947
cg16621691	-0.001388	cg15013019	-0.002115	cg00882235	-0.0004448	cg06069616	-0.003779	cg20411843	-0.001005	cg16465027	-0.001751	cg07278165	-0.006323	cg09143195	-0.002245	cg04319606	-0.003009	cg24713653	-0.00789	cg14236524	-0.004095	cg07019438	-0.004836	cg18101249	-0.00538	cg10942898	-0.003151	cg05260062	-0.003946
cg17186066	-0.001388	cg22193385	-0.002115	cg14443953	-0.0004447	cg13995427	-0.003779	cg25737323	-0.001005	cg07469594	-0.00175	cg10828660	-0.006323	cg09012544	-0.002244	cg08129312	-0.003008	cg23821329	-0.007888	cg16855845	-0.004095	cg13919466	-0.004836	cg23606623	-0.00538	cg17661462	-0.003151	cg11879741	-0.003946
cg18109941	-0.001388	cg04026492	-0.002114	cg00838150	-0.0004444	cg21001184	-0.003777	cg02166394	-0.001004	cg09258479	-0.00175	cg13782932	-0.006323	cg16750801	-0.002244	cg20549620	-0.003008	cg15668468	-0.007887	ch.X.1031144F	-0.004095	cg22076311	-0.004835	cg22349573	-0.005377	cg26723847	-0.003151	cg17543123	-0.003944
cg25451082	-0.001388	cg09125430	-0.002114	cg00425988	-0.0004443	cg25157280	-0.003777	cg03128635	-0.001004	cg15298486	-0.001749	cg20495404	-0.006321	cg24155190	-0.002244	cg07200280	-0.003006	cg23480821	-0.007887	cg14415616	-0.004094	cg09048530	-0.004834	cg01202265	-0.005374	cg26720913	-0.00315	cg16721977	-0.003943
cg26064634	-0.001388	cg10717214	-0.002114	cg13789775	-0.0004443	cg10842095	-0.003776	cg11948456	-0.001004	cg08521684	-0.001748	cg20972214	-0.006321	cg24685134	-0.002243	cg23155911	-0.003006	cg20721917	-0.007879	cg17467525	-0.004094	cg07365816	-0.004831	cg09441966	-0.005374	cg17907238	-0.003148	cg18566883	-0.003941
cg26645082	-0.001388	cg20930366	-0.002113	cg18399703	-0.0004442	cg01901210	-0.003775	cg14928734	-0.001004	cg15184687	-0.001748	ch.X.1282647F	-0.006321	cg05700142	-0.002242	cg06161964	-0.003005	cg02621151	-0.007876	cg04908588	-0.004092	cg03725761	-0.004828	ch.X.92543860F	-0.005373	cg26216433	-0.003146	cg19675778	-0.00394
cg07537821	-0.001387	ch.X.87262228F	-0.002113	cg11898009	-0.000444	cg04864199	-0.003775	cg15579587	-0.001004	cg16585827	-0.001747	cg21618333	-0.006316	cg07693238	-0.002242	cg21052660	-0.003005	cg14365271	-0.007871	cg13441766	-0.004092	cg08358683	-0.004828	cg09493150	-0.005371	cg27409484	-0.003146	cg15983109	-0.003939
cg27202913	-0.001386	cg05443922	-0.002112	cg16978914	-0.000444	cg22614142	-0.003775	cg17996329	-0.001004	cg22349573	-0.001747	cg02545261	-0.00631	cg06230948	-0.002241	cg17475110	-0.003004	cg14034852	-0.007866	cg06254440	-0.004091	cg23067085	-0.004828	cg26425669	-0.005371	cg06636971	-0.003145	cg17183905	-0.003939
cg07139440	-0.001385	cg08540953	-0.002112	cg22161376	-0.0004439	cg23861715	-0.003775	cg07161369	-0.001003	cg24354581	-0.001747	cg23531488	-0.006309	cg23261107	-0.002241	cg19258034	-0.003002	cg04152629	-0.007863	cg04118888	-0.00409	cg07249274	-0.004827	cg10826338	-0.005369	cg11857997	-0.003143	cg13209613	-0.003938
cg02315271	-0.001384	cg15340644	-0.002112	cg11859584	-0.0004438	cg03442350	-0.003774	cg10532362	-0.001003	cg02986494	-0.001746	cg06952752	-0.006307	cg19111999	-0.00224	cg13752974	-0.002995	cg13567542	-0.007863	cg09253931	-0.00409	cg07807026	-0.004823	cg01420254	-0.005366	cg12379775	-0.003143	cg21245287	-0.003938
cg04100595	-0.001384	cg17222452	-0.002112	cg16729690	-0.0004438	cg23038392	-0.003773	cg17688837	-0.001003	cg06713116	-0.001746	cg15244327	-0.006307	cg08372947	-0.002238	cg22730464	-0.002994	cg17861863	-0.007861	cg15177071	-0.00409	cg14514600	-0.004823	cg10988062	-0.005366	cg03405260	-0.003142	cg12145080	-0.003936
cg07265541	-0.001383	cg05656364	-0.002111	cg07170300	-0.0004437	cg01469027	-0.003772	cg08925398	-0.001002	cg17552333	-0.001746	cg18884368	-0.006305	cg18419977	-0.002238	cg03035213	-0.002993	cg06366981	-0.00786	ch.X.1282647F	-0.004089	cg21731345	-0.00482	cg27431234	-0.005366	cg02396676	-0.003141	cg26720913	-0.003936
cg12019773	-0.001383	cg00792107	-0.002108	cg11416290	-0.0004436	cg13789775	-0.003771	cg14415816	-0.001001	cg03061352	-0.001745	cg01901210	-0.006304	cg05822031	-0.002236	cg09492887	-0.002993	ch.X.1031144F	-0.007853	cg02656741	-0.004088	cg02126788	-0.004819	cg22834653	-0.005364	cg07254821	-0.003141	cg03742567	-0.003933
cg15177071	-0.001383	cg02298116	-0.002108	cg02237629	-0.0004435	cg15439745	-0.003768	cg04799181	-0.001	cg13877502	-0.001745	cg04472725	-0.006302	cg06007201	-0.002236	cg12169977	-0.002992	cg19049607	-0.007851	cg26216433	-0.004088	cg00024989	-0.004817	cg07668993	-0.005363	cg05054438	-0.00314	cg04152629	-0.003933
cg17601658	-0.001383	cg06230948	-0.002108	cg17842066	-0.0004435	cg21597595	-0.003766	cg09125430	-0.001	cg05952098	-0.001743	cg01649611	-0.006299	cg08349497	-0.002234	cg24349631	-0.002992	cg16835618	-0.00785	cg08304120	-0.004087	cg05608844	-0.004817	cg02490736	-0.00536	cg10129408	-0.00314	cg12733607	-0.003932
cg23781810	-0.001383	cg15871647	-0.002108	cg14597534	-0.0004433	cg10002178	-0.003765	cg11509269	-0.001	cg02619205	-0.001742	cg05385248	-0.006298	cg01823541	-0.00223	cg25890168	-0.002992	cg05582311	-0.007848	cg24646513	-0.004085	cg17177755	-0.004817	cg14890730	-0.005357	cg08347183	-0.003139	cg04982951	-0.003931
cg23967554	-0.001383	cg17801546	-0.002108	cg05984554	-0.0004432	cg18477204	-0.003765	cg18151987	-0.0009998	cg16957313	-0.001742	cg04917511	-0.006295	cg26437123	-0.002229	cg18110444	-0.002991	cg26760589	-0.007847	cg13432616	-0.004084	cg17775621	-0.004817	cg22218709	-0.005355	cg25682097	-0.003137	cg14120215	-0.00393
cg25158147	-0.001383	cg17838026	-0.002108	cg13689044	-0.0004431	cg00351011	-0.003764	cg13910860	-0.0009997	cg17130457	-0.001742	cg06241292	-0.006295	cg00952516	-0.002228	cg19828516	-0.002991	cg26633751	-0.007843	cg09525295	-0.004083	cg03094193	-0.004816	cg26911220	-0.005352	cg15417798	-0.003135	cg10578602	-0.003928
cg11890741	-0.001382	cg09252999	-0.002106	cg13930300	-0.0004429	cg03117005	-0.003762	cg01750375	-0.0009991	cg06413398	-0.001741	cg08869273	-0.006295	cg17266282	-0.002228	cg24333845	-0.002991	cg21757368	-0.007842	cg00526791	-0.004082	cg11067013	-0.004815	cg05423393	-0.005351	cg03629777	-0.003134	cg22373415	-0.003927
cg07302069	-0.001381	cg10890829	-0.002106	cg15128141	-0.0004427	cg24792289	-0.003762	cg09239756	-0.0009991	cg21037265	-0.001741	cg14825633	-0.006295	cg18629334	-0.002228	cg14652131	-0.00299	cg25513173	-0.007842	cg10110083	-0.00408	cg00293940	-0.004811	cg07089056	-0.005349	cg22091037	-0.003134	cg08970347	-0.003926
cg17895254	-0.001381	cg18450254	-0.002106	cg23627301	-0.0004427	cg02071162	-0.003761	cg05616999	-0.0009988	cg26487948	-0.001741	cg26657240	-0.006294	cg17661462	-0.002227	cg00473462	-0.002987	cg23139609	-0.007833	cg17177755	-0.004075	cg10063637	-0.004811	cg13088406	-0.005349	cg17356181	-0.003133	cg26744375	-0.003926
cg20129210	-0.001381	cg12563178	-0.002105	cg20031397	-0.0004425	cg10261958	-0.003761	cg01520443	-0.0009985	cg16762778	-0.00174	cg23896514	-0.006293	cg07399369	-0.002226	cg24892139	-0.002987	cg24098643	-0.007831	cg18884940	-0.004074	cg03688058	-0.00481	cg27026360	-0.005347	cg10114372	-0.003132	cg25561581	-0.003925
cg12813922	-0.00138	cg16536718	-0.002102	cg19453181	-0.0004423	cg03167413	-0.00376	cg20198108	-0.0009983	cg20826151	-0.00174	cg26653714	-0.006291	cg04525943	-0.002225	cg26650655	-0.002987	cg24081819	-0.007826	cg03657573	-0.004073	cg14709292	-0.004808	cg16695758	-0.005346	cg11138929	-0.003132	cg10253929	-0.003924
cg27570249	-0.00138	cg02488573	-0.0021	cg08874512	-0.0004419	cg04509559	-0.003759	cg08281415	-0.0009974	cg22660447	-0.001739	cg25805709	-0.00629	cg22377643	-0.002225	cg05576648	-0.002986	cg05700142	-0.007824	cg04138112	-0.004071	cg02620361	-0.004807	cg25733480	-0.005344	cg21923992	-0.003131	cg12134570	-0.003923
cg05156137	-0.001379	cg03193328	-0.0021	cg06197769	-0.0004416	cg24131891	-0.003759	cg00327697	-0.0009972	cg04162647	-0.001738	cg08317263	-0.006286	cg17480467	-0.002224	cg19673012	-0.002986	cg26089160	-0.007824	cg27321538	-0.004071	cg10166205	-0.004807	cg12387009	-0.005343	cg14615784	-0.00313	cg04227961	-0.003922
cg07809452	-0.001379	cg18022777	-0.0021	cg16084872	-0.0004416	cg05759347	-0.003758	cg01799588	-0.0009972	cg11672054	-0.001738	cg08430222	-0.006286	cg13797825	-0.002223	cg04824711	-0.002985	cg07274590	-0.007823	cg11150901	-0.004068	cg03269060	-0.004803	cg10585371	-0.005342	cg13845094	-0.003128	cg06679694	-0.003922
cg08676425	-0.001379	cg25131544	-0.0021	cg22753340	-0.0004416	cg14743462	-0.003758	cg02753619	-0.0009972	cg02509058	-0.001736	cg16412956	-0.006286	cg18396832	-0.002223	cg20175702	-0.002985	cg22956254	-0.007821	cg10585371	-0.004067	cg06413398	-0.004802	cg20893203	-0.005339	cg25666919	-0.003127	cg14609729	-0.003922
cg20091297	-0.001379	cg07012770	-0.002099	cg23856027	-0.0004414	cg05629721	-0.003757	cg21468825	-0.000997	cg06367647	-0.001736	cg06175981	-0.006285	cg25936054	-0.002223	cg09896120	-0.002984	cg02577108	-0.00782	cg12526298	-0.004067	cg08988364	-0.004802	cg15069926	-0.005337	cg21530045	-0.00312	cg12169536	-0.00392
ch.X.938089F	-0.001379	cg08828594	-0.002098	cg08038052	-0.0004413	cg26827987	-0.003756	cg02297936	-0.0009969	cg09253931	-0.001736	cg18192294	-0.006285	cg06581978	-0.002222	cg15668468	-0.002984	cg15225091	-0.007818	cg00705280	-0.004066	cg25033817	-0.004802	cg00203089	-0.005336	cg00167654	-0.003119	cg12361663	-0.00392
cg14356946	-0.001378	cg06102777	-0.002097	cg16411256	-0.0004413	cg19621460	-0.003755	cg05636131	-0.0009968	cg23436960	-0.001736	cg00983437	-0.006284	cg06927775	-0.002222	cg01768201	-0.002983	cg05418487	-0.007812	cg25682097	-0.004066	cg05700142	-0.004798	cg10170049	-0.005336	cg14262681	-0.003119	cg24349631	-0.00392
cg00204501	-0.001377	cg06996609	-0.002096	cg04799181	-0.0004412	cg21357108	-0.003754	cg11721249	-0.0009958	cg10638599	-0.001734	cg06740227	-0.006283	cg00450784	-0.002221	cg21732383	-0.002983	cg20095124	-0.007809	cg17668731	-0.004063	cg05419671	-0.004797	cg12431483	-0.005333	cg23446109	-0.003119	cg08282819	-0.003919
cg06358970	-0.001377	cg18515872	-0.002096	cg10502118	-0.0004412	cg04154825	-0.003753	cg24073074	-0.0009958	cg15233880	-0.001734	cg08636385	-0.006283	cg21235151	-0.002221	cg23919433	-0.002983	cg23164459	-0.007805	cg01447281	-0.004062	cg07722358	-0.004797	cg25475056	-0.005332	cg04599403	-0.003117	cg17891011	-0.003919
cg20555674	-0.001376	cg08551615	-0.002094	cg17507671	-0.0004411	cg18779283	-0.003752	cg13029706	-0.0009957	cg27216998	-0.001734	cg06358970	-0.006282	cg09941112	-0.00222	cg25983553	-0.002983	cg08079596	-0.007802	cg05983315	-0.004062	cg26428073	-0.004797	cg20918957	-0.005328	cg24906525	-0.003117	cg21287936	-0.003919
cg26653360	-0.001376	cg27458485	-0.002094	cg18396832	-0.0004407	cg10196128	-0.003751	cg14062468	-0.0009953	cg02012576	-0.001733	cg22349573	-0.00628	cg13919466	-0.00222	cg18258224	-0.002982	cg07254821	-0.007801	cg15339605	-0.004062	cg12610207	-0.004796	cg20474370	-0.005327	cg06627077	-0.003115	cg11282936	-0.003917
cg04301104	-0.001375	cg27508551	-0.002093	cg13208832	-0.0004406	cg26342671	-0.003749	cg17147211	-0.0009952	cg18664369	-0.001733	cg01357292	-0.006279	cg15490075	-0.00222	cg02934221	-0.002981	cg07561162	-0.007801	cg27292588	-0.004062	cg17526424	-0.004796	cg24878755	-0.005323	cg10241671	-0.003115	cg00520933	-0.003916
cg08938793	-0.001375	cg01472538	-0.002092	cg14814195	-0.0004405	cg01431992	-0.003748	cg23833896	-0.0009945	cg00666763	-0.001732	cg17001566	-0.006277	cg14258341	-0.002219	cg09048530	-0.002981	cg27326452	-0.007799	cg07531860	-0.004061	cg05080330	-0.004795	cg12706425	-0.005321	cg26633751	-0.003114	cg23833896	-0.003915
cg10717214	-0.001375	cg00408026	-0.002091	cg00103778	-0.0004403	cg02821342	-0.003747	cg16205490	-0.0009943	cg01210554	-0.001732	cg26059078	-0.00627	cg19192223	-0.002218	cg03470073	-0.002977	cg15567428	-0.007795	cg20287640	-0.00406	cg04310104	-0.004793	cg16072192	-0.005318	cg07315993	-0.003113	cg09239756	-0.003914
cg17688837	-0.001375	cg18565473	-0.002091	cg08372947	-0.0004403	cg06940792	-0.003746	cg21056542	-0.0009943	cg09143195	-0.001732	cg26299194	-0.00627	cg01109135	-0.002217	cg21399685	-0.002977	cg12713583	-0.007794	cg09239756	-0.004058	cg05061711	-0.004792	cg21377512	-0.005318	cg19451167	-0.003113	cg07491109	-0.003912
cg22863523	-0.001375	cg12845520	-0.00209	cg10112017	-0.0004403	cg01061890	-0.003744	cg23319546	-0.000994	cg14841828	-0.001732	cg03025135	-0.006269	cg12352038	-0.002217	cg01031400	-0.002976	cg18475643	-0.007794	cg13071476	-0.004058	cg07431286	-0.004791	cg12689375	-0.005315	cg24097797	-0.003113	cg02237629	-0.003911
ch.X.68408155R	-0.001375	cg13578647	-0.00209	cg19380361	-0.0004403	cg24361291	-0.003744	cg15831060	-0.0009938	cg23531488	-0.001732	cg08279184	-0.006269	cg15646382	-0.002217	cg14210607	-0.002976	cg26085804	-0.007786	cg23521835	-0.004056	cg11033617	-0.004791	cg25183082	-0.005311	cg18453965	-0.003111	cg10875346	-0.003911
cg11189384	-0.001374	cg18825531	-0.00209	cg14372701	-0.00044	cg18845984	-0.003743	cg15481636	-0.0009937	cg05732979	-0.001731	cg10110083	-0.006269	cg18128164	-0.002217	cg19924948	-0.002976	cg08110488	-0.007782	cg26666107	-0.004055	cg15100227	-0.004791	cg17964505	-0.00531	cg02535219	-0.00311	cg12106634	-0.003911
cg16703576	-0.001374	cg22982368	-0.00209	cg23071995	-0.00044	cg19389641	-0.003743	cg00605038	-0.0009933	cg01043119	-0.00173	cg17364114	-0.006266	cg22505962	-0.002217	cg16264966	-0.002975	cg24797187	-0.007781	cg05869122	-0.004054	cg01597480	-0.00479	cg00446414	-0.005309	cg06472065	-0.003108	cg23465465	-0.00391
cg02971546	-0.001373	cg02380334	-0.002089	cg25846784	-0.00044	cg05156137	-0.003742	cg06157318	-0.0009931	cg06358970	-0.00173	cg07443287	-0.006265	cg25179291	-0.002215	cg04635642	-0.002973	cg19356311	-0.00778	cg15225091	-0.004052	cg15184687	-0.004789	cg26505691	-0.005309	cg21908259	-0.003107	cg14149007	-0.003909
cg17820591	-0.001373	cg23583920	-0.002089	cg24276681	-0.0004398	cg02794451	-0.003741	cg23428985	-0.0009931	cg16722536	-0.001729	cg11045814	-0.006265	cg10307145	-0.002214	cg06366981	-0.002973	ch.X.42405548R	-0.00778	cg24097797	-0.004052	cg10169869	-0.004788	cg02091489	-0.005307	cg12708336	-0.003106	cg08119082	-0.003908
cg06933574	-0.001372	cg10106388	-0.002087	cg10617784	-0.0004397	cg07476923	-0.003741	cg18913332	-0.000993	cg23319546	-0.001729	cg11402586	-0.006263	cg15417798	-0.002214	cg25255293	-0.002973	cg00898683	-0.007779	cg00409917	-0.004048	cg22958957	-0.004788	cg18179075	-0.005307	cg04476414	-0.003105	cg04843775	-0.003907
cg08878368	-0.001372	cg05969808	-0.002086	cg18031596	-0.0004397	cg05872706	-0.00374	cg05293738	-0.0009927	cg23252902	-0.001728	cg05960677	-0.00626	cg16470319	-0.002214	cg04518912	-0.00297	cg19650157	-0.007779	cg24098643	-0.004048	cg01016521	-0.004785	cg26898352	-0.005306	cg15079315	-0.003105	cg05966978	-0.003907
cg10543450	-0.001372	cg07565540	-0.002086	cg08231348	-0.0004396	cg17163527	-0.00374	cg03309253	-0.0009913	cg20549620	-0.001727	cg04160501	-0.006258	cg06685968	-0.002213	cg12530994	-0.00297	cg11861986	-0.007776	cg05140648	-0.004046	cg18940830	-0.004782	cg25999578	-0.005305	cg04508482	-0.003104	cg09874289	-0.003907
cg17353698	-0.001372	cg22975695	-0.002086	cg10477079	-0.0004396	cg05893300	-0.003739	cg05292330	-0.0009911	cg26530485	-0.001727	cg25012577	-0.006257	cg07045891	-0.002213	cg06514078	-0.002969	cg01901107	-0.007775	cg00041328	-0.004043	cg25347264	-0.004782	cg02408775	-0.005302	cg09692531	-0.003104	cg20138458	-0.003907
cg22628840	-0.001372	cg09355771	-0.002085	cg09680447	-0.0004394	cg07905444	-0.003738	cg09056501	-0.0009909	cg18892808	-0.001726	cg07654569	-0.006255	cg20138458	-0.002213	cg01636650	-0.002968	cg09993119	-0.007775	cg07753583	-0.004043	cg20621021	-0.004781	cg06756211	-0.005301	cg02962944	-0.003103	cg23254047	-0.003907
cg02441647	-0.001371	cg05418487	-0.002083	cg16536718	-0.0004393	cg21948169	-0.003738	cg13234848	-0.0009907	cg23244022	-0.001726	cg23922454	-0.006254	cg00462107	-0.002212	cg02001279	-0.002968	cg19859698	-0.007768	cg09183316	-0.004043	cg23791611	-0.00478	cg03015080	-0.005295	cg24526433	-0.003102	cg12361223	-0.003905
cg08554257	-0.001371	cg12644625	-0.002082	cg03483267	-0.0004392	cg25442239	-0.003737	cg17353698	-0.0009906	cg19657603	-0.001725	cg00446414	-0.006253	cg03287340	-0.002212	cg03321508	-0.002968	cg21933859	-0.007762	cg20117153	-0.004042	cg00554442	-0.004779	cg20564913	-0.005295	cg19121473	-0.003101	cg21364560	-0.003904
cg01636650	-0.00137	cg24366702	-0.002082	cg22550229	-0.0004391	cg22832061	-0.003736	cg13432616	-0.0009897	cg21478137	-0.001724	cg04824711	-0.006249	cg03838680	-0.002212	cg09180848	-0.002968	cg26685941	-0.00776	cg26493353	-0.004042	cg05660611	-0.004778	cg21080297	-0.005295	cg14852134	-0.0031	cg27647594	-0.003902
cg01637404	-0.00137	cg18073151	-0.002081	cg26505691	-0.0004391	cg19789466	-0.003735	cg12644625	-0.0009893	cg25150878	-0.001724	cg17851046	-0.006246	cg05962325	-0.002212	cg10658438	-0.002968	cg19965941	-0.007759	cg10141008	-0.004041	cg14376467	-0.004776	cg24610274	-0.005295	cg18064474	-0.003099	cg02247183	-0.0039
cg12289983	-0.00137	cg07850604	-0.00208	cg02454982	-0.000439	cg02077793	-0.003734	cg10837843	-0.0009892	cg18943693	-0.001721	cg00002719	-0.006245	cg26342671	-0.002212	cg04411625	-0.002967	cg04120428	-0.007755	cg08437570	-0.004039	cg18635645	-0.004775	ch.X.1698482R	-0.005295	cg12526298	-0.003097	cg24133569	-0.0039
cg18150120	-0.00137	cg26870460	-0.00208	cg25163851	-0.0004389	cg06263193	-0.003734	cg25022560	-0.0009889	cg07431229	-0.00172	cg18886444	-0.006243	cg00981594	-0.002211	cg14093715	-0.002966	cg19241689	-0.00775	cg14120010	-0.004038	cg22112051	-0.004775	cg02045355	-0.005291	cg23699916	-0.003097	cg05953927	-0.003899
cg23954922	-0.00137	cg00351011	-0.002078	cg14151259	-0.0004386	cg03096975	-0.003732	cg20234121	-0.0009888	cg09965996	-0.00172	cg13215970	-0.006242	cg06254440	-0.002211	cg23137531	-0.002966	cg05999287	-0.007741	cg04964062	-0.004037	cg21481775	-0.004774	cg04120428	-0.005291	cg20464804	-0.003096	cg07516470	-0.003899
cg03466124	-0.001369	cg06069616	-0.002078	cg24638647	-0.0004386	cg04636841	-0.003732	cg00186909	-0.0009884	cg14729148	-0.00172	cg00450784	-0.006241	cg09503596	-0.00221	cg11044163	-0.002965	cg00004257	-0.00774	cg11225528	-0.004033	cg23712359	-0.004771	cg08272572	-0.005289	cg13786801	-0.003095	cg18968597	-0.003897
cg05313771	-0.001369	cg06081609	-0.002078	cg27067425	-0.0004386	cg14446942	-0.003732	cg07403397	-0.000988	cg23699879	-0.00172	cg00117172	-0.00624	cg23214464	-0.002209	cg03259494	-0.002964	ch.X.409130R	-0.00774	cg04677227	-0.004032	cg18043828	-0.00477	cg09777344	-0.005289	cg27315170	-0.003095	cg25530908	-0.003897
cg09682311	-0.001369	cg09689449	-0.002078	cg09956907	-0.0004384	cg21726284	-0.003732	cg14420108	-0.0009877	cg27563048	-0.00172	cg26760589	-0.006239	cg12134570	-0.002208	cg04233717	-0.002964	cg12436196	-0.007737	cg16695758	-0.004032	cg18101249	-0.004769	cg18945842	-0.005288	cg09164898	-0.003088	cg03315007	-0.003896
cg15506157	-0.001369	cg20249584	-0.002078	cg01477255	-0.0004383	cg26487031	-0.003731	cg12695685	-0.0009869	cg00916884	-0.001719	cg05987698	-0.006237	cg12479674	-0.002208	cg04907257	-0.002964	cg13537353	-0.007734	cg19868691	-0.004032	cg09467501	-0.004768	cg07278165	-0.005287	cg16810293	-0.003088	cg12279138	-0.003896
cg26992213	-0.001369	cg13814485	-0.002077	cg13154104	-0.0004383	cg20740434	-0.00373	cg12067687	-0.0009868	cg02535219	-0.001719	cg07580591	-0.006237	cg13836518	-0.002208	cg20342628	-0.002962	cg15067865	-0.007734	cg03901257	-0.00403	cg11152384	-0.004768	cg08055087	-0.005286	cg04173714	-0.003087	cg00327697	-0.003895
cg09138445	-0.001368	cg03123370	-0.002075	cg16379337	-0.0004383	cg04845871	-0.003729	cg04999479	-0.0009863	cg05038268	-0.001719	cg23254047	-0.006231	cg02958634	-0.002207	cg16695758	-0.002961	cg02853703	-0.007733	cg08774969	-0.00403	cg13214190	-0.004767	cg16173191	-0.005284	cg06498520	-0.003086	cg09225230	-0.003895
cg17027195	-0.001368	cg08938793	-0.002075	cg00526791	-0.0004377	cg01765249	-0.003728	cg11135021	-0.0009863	cg12448724	-0.001719	cg19859698	-0.006227	cg07971674	-0.002207	cg24770596	-0.002961	cg23692497	-0.007733	cg11480264	-0.004029	cg02809401	-0.004766	cg05697909	-0.005283	cg09048530	-0.003086	cg18179075	-0.003895
cg23199335	-0.001368	cg10164885	-0.002075	cg07956515	-0.0004374	cg02472291	-0.003727	cg16235861	-0.0009863	cg19120897	-0.001719	cg04920527	-0.006226	cg02194789	-0.002206	cg03355690	-0.00296	cg08787401	-0.007732	cg19216198	-0.004029	cg03998173	-0.004766	cg07170300	-0.005282	cg20655010	-0.003086	cg23328050	-0.003895
cg00107603	-0.001367	cg23533683	-0.002075	cg13554207	-0.0004374	cg23552977	-0.003727	cg27570249	-0.0009862	cg19216198	-0.001718	cg24097797	-0.006226	cg13939204	-0.002206	cg00757327	-0.002959	cg26052635	-0.007729	cg05694021	-0.004027	cg12706425	-0.004766	cg10037913	-0.005279	cg04113075	-0.003085	cg26248552	-0.003895
cg22729726	-0.001367	cg00231049	-0.002074	cg16577002	-0.0004374	cg00680551	-0.003725	cg22783363	-0.0009855	cg27187555	-0.001718	cg19380361	-0.006224	cg06748511	-0.002205	cg08349497	-0.002959	cg20392842	-0.007725	cg07722358	-0.004027	cg14442841	-0.004763	cg04829186	-0.005278	cg10946669	-0.003085	cg11342670	-0.003894
cg26052635	-0.001366	cg21453443	-0.002074	cg08371772	-0.0004373	cg22935149	-0.003725	cg14572967	-0.0009854	cg24321347	-0.001717	cg03084949	-0.006223	cg13483882	-0.002205	cg05698090	-0.002958	cg07046575	-0.007722	cg20009101	-0.004027	cg19965941	-0.004763	cg23849078	-0.005278	cg24865292	-0.003085	cg17759086	-0.003894
cg27300494	-0.001366	cg02730156	-0.002073	cg04820200	-0.0004372	cg01612366	-0.003724	cg09930033	-0.0009849	cg03623982	-0.001716	cg15519065	-0.006223	cg23838245	-0.002205	cg14595003	-0.002958	cg22885965	-0.007722	cg00734483	-0.004026	cg21116783	-0.004761	cg02671213	-0.005277	cg00887511	-0.003083	cg18531146	-0.003894
cg26904406	-0.001365	cg23104954	-0.002073	cg04864199	-0.0004371	cg04588165	-0.003723	cg11082691	-0.0009847	cg11468993	-0.001716	cg01597480	-0.006221	cg23967554	-0.002205	cg09192572	-0.002954	cg03641748	-0.007721	cg01265531	-0.004023	cg23765170	-0.004758	cg17296588	-0.005277	cg15631323	-0.003083	cg05886952	-0.003893
cg18351406	-0.001364	cg05962325	-0.002072	cg15534084	-0.000437	cg11926776	-0.003722	cg17956079	-0.0009847	cg12039766	-0.001716	cg10357657	-0.00622	cg04896381	-0.002204	cg10890829	-0.002954	cg23833896	-0.007721	cg05634149	-0.004022	cg07928641	-0.004757	cg16857858	-0.005276	cg24228112	-0.003083	cg13145750	-0.003893
cg21468825	-0.001364	cg14696396	-0.002071	cg16940012	-0.0004369	cg00164235	-0.00372	cg04645070	-0.0009839	cg07443287	-0.001715	cg05437446	-0.006219	cg19657603	-0.002204	cg12920938	-0.002953	cg17151991	-0.007717	cg22703724	-0.00402	cg00790020	-0.004749	cg26588825	-0.005275	cg25141943	-0.003083	cg07443287	-0.00389
cg04509074	-0.001363	cg17491987	-0.002071	cg15944684	-0.0004368	cg13422850	-0.003719	cg08321576	-0.0009839	cg20169506	-0.001714	cg01780754	-0.006218	cg09297288	-0.002203	cg23092823	-0.002952	cg14219290	-0.007716	cg01725199	-0.004018	cg19753794	-0.004749	cg15543281	-0.005273	cg17998964	-0.003082	cg12238593	-0.00389
cg24131891	-0.001363	cg06781135	-0.002069	cg04728480	-0.0004363	cg03855710	-0.003718	cg11209832	-0.0009839	cg20869673	-0.001714	cg00262446	-0.006216	cg15487105	-0.002203	cg09503596	-0.002951	cg13836518	-0.00771	cg09756482	-0.004018	cg24307440	-0.004749	cg16653495	-0.005273	cg00702638	-0.003081	cg19395441	-0.00389
cg04537729	-0.001362	cg08601357	-0.002069	cg12995941	-0.0004362	cg01491219	-0.003717	cg15745385	-0.0009837	cg12479674	-0.001712	cg00838898	-0.006215	cg17510056	-0.002203	cg07045891	-0.00295	cg17220042	-0.00771	cg16521978	-0.004017	cg15069926	-0.004748	cg13537353	-0.005272	cg27101125	-0.00308	cg20430847	-0.003889
cg16336751	-0.001362	cg06103642	-0.002068	cg27083689	-0.0004362	cg07423363	-0.003717	cg08279184	-0.0009836	cg15043720	-0.001712	cg17956079	-0.006215	cg19623237	-0.002203	cg26511997	-0.00295	cg09029902	-0.007709	cg18188010	-0.004016	cg19273995	-0.004748	cg11696475	-0.00527	cg09557387	-0.003078	cg17381565	-0.003888
cg06134410	-0.001361	cg25851152	-0.002068	cg01943641	-0.000436	cg25820257	-0.003717	cg26979504	-0.0009836	cg15802555	-0.001712	cg18020955	-0.006215	cg10259735	-0.002202	cg02397720	-0.002949	cg19623237	-0.007704	cg20917083	-0.004016	cg26027170	-0.004747	cg13981380	-0.00527	cg08694699	-0.003076	cg08621846	-0.003886
cg00377074	-0.00136	cg26736540	-0.002068	cg04187185	-0.0004359	cg00525011	-0.003716	cg07582157	-0.0009832	cg21726284	-0.001712	cg26022183	-0.006215	cg19037922	-0.002202	cg11567001	-0.002949	cg00256155	-0.0077	cg23691090	-0.004015	cg12164922	-0.004746	cg15956237	-0.005269	cg14547067	-0.003076	cg11183136	-0.003885
cg01889143	-0.00136	cg09605317	-0.002066	cg10946669	-0.0004357	cg16492377	-0.003715	cg14030346	-0.0009828	cg24349631	-0.001712	cg12155547	-0.006214	cg24154161	-0.002202	cg18759693	-0.002949	cg01043119	-0.0077	cg27634695	-0.004015	cg16855845	-0.004745	cg22888181	-0.005267	cg22568403	-0.003076	cg20946504	-0.003885
cg00674304	-0.001359	cg23224090	-0.002066	cg00041084	-0.0004356	cg26487562	-0.003713	cg17879722	-0.0009828	cg26906217	-0.001712	cg24129626	-0.006213	cg00674304	-0.002201	cg25110126	-0.002948	cg14107883	-0.007698	cg00268086	-0.004014	cg23915792	-0.004744	cg10061342	-0.005265	cg24535130	-0.003074	cg14255256	-0.003884
cg07554329	-0.001359	cg14151259	-0.002065	cg08144172	-0.0004355	cg18475643	-0.003711	cg26988138	-0.0009828	ch.X.102893131F	-0.001712	cg01778994	-0.006208	cg08640252	-0.002201	cg14841337	-0.002947	ch.X.188238R	-0.007697	cg02627991	-0.004014	cg13442428	-0.004743	cg16701767	-0.005261	cg15369821	-0.003073	cg09692531	-0.003882
cg09151381	-0.001359	cg14707269	-0.002065	cg01899253	-0.0004354	cg02943720	-0.00371	cg18763720	-0.0009825	cg22793735	-0.001711	cg16594165	-0.006205	cg10091994	-0.002201	cg26189112	-0.002946	cg04411841	-0.007694	cg04522671	-0.004014	cg23654971	-0.004742	cg11935153	-0.005257	cg15746696	-0.003071	cg02413850	-0.00388
cg10701282	-0.001359	cg21184585	-0.002065	cg07045891	-0.0004354	cg15471815	-0.00371	cg11608897	-0.0009823	cg09415272	-0.001709	cg18032190	-0.006205	cg22734086	-0.002201	cg10498429	-0.002945	cg14233838	-0.007693	cg09029902	-0.004013	cg14215459	-0.004738	cg00940502	-0.005251	cg18709545	-0.003071	cg02656741	-0.00388
cg23319546	-0.001359	cg21251125	-0.002065	cg09068528	-0.0004354	cg10393598	-0.003709	cg22441533	-0.0009821	cg18153977	-0.001709	cg21533331	-0.006203	cg01301282	-0.0022	cg20433906	-0.002945	cg07636178	-0.00769	cg14515996	-0.004013	cg11451801	-0.004733	cg02503981	-0.005251	cg22006060	-0.003071	cg02201071	-0.003878
cg18693345	-0.001358	cg23732483	-0.002065	cg16998537	-0.0004354	cg12427321	-0.003709	cg26549174	-0.0009818	cg00945038	-0.001708	cg11723397	-0.006202	cg00474080	-0.002198	cg27084903	-0.002945	cg13209122	-0.00769	cg20414098	-0.004013	cg18781240	-0.004733	cg07911953	-0.005251	cg16427096	-0.003069	cg07988060	-0.003878
cg25911901	-0.001358	cg26081071	-0.002065	cg20863963	-0.0004353	cg18892169	-0.003709	cg27596415	-0.0009817	cg04123409	-0.001708	cg18665871	-0.006197	cg01597066	-0.002198	cg00474080	-0.002944	cg24671939	-0.00769	cg22732101	-0.004013	cg20778582	-0.004733	cg12708336	-0.005248	cg15013019	-0.003068	cg20842253	-0.003877
cg04367351	-0.001357	cg02340851	-0.002064	cg14991487	-0.0004352	cg26127778	-0.003709	cg07857404	-0.0009815	cg06981182	-0.001708	cg00981877	-0.006193	cg05929574	-0.002198	cg01981762	-0.002944	cg14609729	-0.007688	cg10226546	-0.004012	cg10851739	-0.004731	cg15520443	-0.005248	cg23610018	-0.003068	cg12610207	-0.003876
cg12002589	-0.001357	cg00945038	-0.002063	cg04106636	-0.0004351	cg10321973	-0.003708	cg08675092	-0.0009813	cg00083262	-0.001707	cg25299750	-0.006193	cg02172652	-0.002197	cg00759699	-0.002943	cg23683528	-0.007688	cg01383890	-0.004009	cg05675249	-0.004729	cg06366981	-0.005246	cg06478823	-0.003067	cg24270191	-0.003876
cg13357602	-0.001357	cg07449645	-0.002063	cg14598950	-0.0004349	cg14837165	-0.003708	cg13603113	-0.000981	cg07451261	-0.001707	cg10673740	-0.006191	cg03306024	-0.002197	cg04276084	-0.002943	cg02378269	-0.007685	cg12668399	-0.004009	cg26343298	-0.004723	cg16810293	-0.005246	cg01312858	-0.003066	cg23627301	-0.003871
cg19397128	-0.001357	cg08909806	-0.002063	cg20669012	-0.0004344	cg17174775	-0.003708	cg22973042	-0.000981	cg08470180	-0.001706	cg07635227	-0.006189	cg07216976	-0.002197	cg04301104	-0.002943	cg03061682	-0.007682	cg14155397	-0.004006	cg03470180	-0.004722	cg02872545	-0.005243	cg15745385	-0.003066	cg00370293	-0.00387
cg23407970	-0.001357	cg16650717	-0.002063	cg26089160	-0.0004344	cg26478401	-0.003707	cg23615676	-0.000981	ch.X.2058079F	-0.001705	cg23930313	-0.006188	cg08727535	-0.002196	cg09200308	-0.002943	cg10013716	-0.007681	cg14707269	-0.004005	cg07971674	-0.004722	cg00231049	-0.005241	cg08121478	-0.003064	cg03869498	-0.00387
cg00119057	-0.001356	cg15481636	-0.002062	cg03839949	-0.0004343	cg03025135	-0.003705	cg11528176	-0.0009805	cg17972073	-0.001704	cg10259735	-0.006186	cg22046408	-0.002196	cg18598117	-0.002943	cg11082691	-0.007678	cg25812424	-0.004004	cg06667063	-0.004719	cg12427321	-0.00524	cg15174823	-0.003064	cg06956048	-0.003869
cg01950665	-0.001356	cg05100282	-0.002061	cg12951726	-0.0004342	cg16101346	-0.003704	cg21784498	-0.0009805	cg20052760	-0.001704	cg06463589	-0.006185	cg06652329	-0.002195	cg20108908	-0.002943	cg23086720	-0.007678	cg19826026	-0.004003	cg09238801	-0.004719	cg02283436	-0.005237	cg21809007	-0.003062	cg03460001	-0.003866
cg06981182	-0.001356	cg08262220	-0.002061	cg15177071	-0.0004342	cg10280299	-0.003703	cg02669807	-0.0009802	cg21309147	-0.001704	cg18566883	-0.006185	cg06940792	-0.002195	cg15394142	-0.002942	cg11431126	-0.007676	cg09550909	-0.004001	cg20528780	-0.004718	cg02535219	-0.005233	cg14219290	-0.003061	cg15834037	-0.003865
cg23460961	-0.001356	cg18844210	-0.002061	cg03062564	-0.000434	cg10585371	-0.003703	cg02163885	-0.0009801	cg23316987	-0.001704	cg01859739	-0.006184	cg11776014	-0.002195	cg23708763	-0.002942	cg02207200	-0.007674	cg12513505	-0.004001	cg22366088	-0.004717	cg06148974	-0.005233	cg19943000	-0.003057	cg19357499	-0.003865
cg06046430	-0.001355	cg02012576	-0.002059	cg22017733	-0.0004338	cg22628281	-0.003703	cg17861863	-0.0009801	cg03103158	-0.001703	cg04829853	-0.006183	cg25969107	-0.002194	cg25023994	-0.002942	cg09180848	-0.007674	cg23130076	-0.004	cg03289416	-0.004716	cg06869532	-0.005232	cg05042743	-0.003056	cg20041802	-0.003865
cg11672054	-0.001355	cg13689044	-0.002059	cg18805028	-0.0004336	cg11795854	-0.003702	cg08746900	-0.0009795	cg10245915	-0.001703	cg08578023	-0.00618	cg11910167	-0.002193	cg12155547	-0.002941	cg00049440	-0.007672	cg06882298	-0.003997	cg26487031	-0.004715	cg16084872	-0.005232	cg11393185	-0.003056	cg10150686	-0.003864
cg14415816	-0.001355	cg23933618	-0.002059	cg07091207	-0.0004335	cg22734086	-0.003702	cg09238801	-0.0009795	cg17199320	-0.001703	cg22135324	-0.00618	cg23873448	-0.002192	cg16573542	-0.002941	cg04824711	-0.007669	cg00081445	-0.003995	cg07654569	-0.004712	cg26633751	-0.005232	cg12038696	-0.003056	cg08928696	-0.003863
cg24975564	-0.001355	cg15563450	-0.002058	cg21039708	-0.0004332	cg24079969	-0.003701	cg13014531	-0.0009794	cg19176391	-0.001702	cg24066731	-0.00618	cg25158622	-0.002191	cg02017450	-0.002939	cg19808978	-0.007669	cg20555674	-0.003995	cg16291657	-0.004712	cg04489069	-0.00523	cg08430222	-0.003055	cg02535219	-0.003862
cg00987461	-0.001354	cg18150120	-0.002057	cg17945323	-0.000433	cg02722188	-0.0037	cg16718624	-0.0009794	cg05162750	-0.001701	cg25936054	-0.006177	cg00790098	-0.00219	cg18241829	-0.002939	cg04982951	-0.007666	cg23967540	-0.003995	cg20559000	-0.004711	cg19051416	-0.00523	cg20877313	-0.003054	cg22460123	-0.003862
cg06713199	-0.001354	cg05895376	-0.002056	cg05893300	-0.0004329	cg26924496	-0.0037	cg14037484	-0.0009789	cg26170244	-0.001701	cg09415272	-0.006175	cg25491558	-0.00219	cg26561413	-0.002939	cg21000227	-0.007663	cg20738406	-0.003993	cg16856833	-0.00471	cg08347183	-0.005227	cg17415265	-0.00305	cg23000808	-0.003861
cg00778807	-0.001353	cg15126544	-0.002056	cg06886207	-0.0004329	cg26945715	-0.0037	cg14022711	-0.0009788	cg24700485	-0.001698	cg12155676	-0.006175	cg09276998	-0.002189	cg10169869	-0.002938	cg03094193	-0.007661	cg02396676	-0.003992	cg07333046	-0.004708	cg16561266	-0.005227	cg24360197	-0.003049	cg27409484	-0.003861
cg19323951	-0.001353	cg25134515	-0.002056	cg19657603	-0.0004329	cg14151259	-0.003699	cg22256631	-0.0009783	cg04921989	-0.001697	cg13348059	-0.006172	cg26457761	-0.002189	cg10398774	-0.002937	cg21430685	-0.00766	cg14107883	-0.003992	cg05480594	-0.004707	cg01817464	-0.005225	cg26201952	-0.003048	cg21908259	-0.00386
cg23088184	-0.001353	cg06022942	-0.002055	cg09530790	-0.0004327	cg22814884	-0.003698	cg07255019	-0.0009781	cg09166091	-0.001697	cg00828689	-0.006171	cg01361499	-0.002188	cg15184687	-0.002937	cg00563090	-0.007659	cg17317962	-0.00399	cg03291960	-0.004704	cg27447689	-0.005225	cg02481642	-0.003046	cg03298319	-0.003859
cg01130792	-0.001352	cg14157844	-0.002055	cg04221521	-0.0004326	cg16666964	-0.003697	cg08827358	-0.0009781	cg09508531	-0.001697	cg11569486	-0.006171	cg25957967	-0.002188	cg20369204	-0.002937	cg04839259	-0.007654	cg10308629	-0.003989	cg10996111	-0.004703	cg13498858	-0.005222	cg25183082	-0.003046	cg03848675	-0.003859
cg01539948	-0.001352	cg00033668	-0.002054	cg26827987	-0.0004325	cg18422875	-0.003696	cg16612998	-0.0009781	cg20402079	-0.001697	cg14481222	-0.00617	cg02534163	-0.002187	cg21530045	-0.002937	cg20430847	-0.007654	cg03349819	-0.003987	cg05650680	-0.004699	cg14943135	-0.00522	cg02708401	-0.003044	cg09805405	-0.003858
cg05951377	-0.001352	cg11624479	-0.002054	cg04588840	-0.0004324	cg09682311	-0.003695	ch.X.57019131F	-0.0009781	cg22285621	-0.001696	cg19673012	-0.00617	cg07381000	-0.002187	cg14215459	-0.002933	cg02408775	-0.007649	cg20560075	-0.003987	cg27139956	-0.004698	cg24478145	-0.00522	cg06718763	-0.003044	cg17164063	-0.003858
cg08616654	-0.001352	cg07904452	-0.002053	cg07231544	-0.0004324	cg15891422	-0.003695	cg09984136	-0.0009779	cg06075311	-0.001695	cg25183082	-0.00617	cg16885296	-0.002187	cg18943693	-0.002933	cg18756545	-0.007649	cg06366981	-0.003982	cg07232475	-0.004695	cg25969107	-0.00522	cg02964396	-0.003043	cg10996111	-0.003857
cg24862483	-0.001352	cg19657603	-0.002053	cg14743462	-0.0004324	cg27342837	-0.003692	cg04368076	-0.0009776	cg18891712	-0.001695	ch.X.97651759F	-0.00617	cg17538280	-0.002187	cg24081819	-0.002933	cg15177071	-0.007646	cg09072162	-0.003982	cg25640519	-0.004694	cg26069719	-0.00522	cg07933176	-0.003043	cg25675772	-0.003857
cg13442299	-0.001351	cg23787321	-0.002053	cg17473673	-0.0004323	cg13151102	-0.00369	cg26301565	-0.0009776	cg04424621	-0.001694	cg16122072	-0.006169	cg01447281	-0.002186	cg12195238	-0.002932	cg14420108	-0.007644	cg24133569	-0.00398	cg15177071	-0.004691	cg21933859	-0.005219	cg14166485	-0.003042	cg15990192	-0.003856
cg19192223	-0.001351	cg14084091	-0.002052	cg18566883	-0.0004323	cg16034881	-0.003688	cg22114489	-0.0009774	cg25442239	-0.001694	cg01434608	-0.006168	cg17776267	-0.002186	cg23564243	-0.002932	cg15622672	-0.007644	cg05260062	-0.003979	cg00768487	-0.004687	cg14181223	-0.005218	cg14930642	-0.003041	cg20621021	-0.003856
cg20406460	-0.001351	cg16335762	-0.002052	cg24984523	-0.0004322	cg19724470	-0.003688	cg19422030	-0.0009769	cg00506629	-0.001693	cg14822966	-0.006165	cg02964396	-0.002185	cg02619205	-0.002931	cg09159285	-0.007639	cg04152629	-0.003978	cg23922454	-0.004687	cg21379321	-0.005217	cg18405140	-0.003041	cg02046143	-0.003854
cg21790305	-0.001351	cg00241638	-0.002051	cg16104915	-0.0004321	cg13975625	-0.003687	cg08857144	-0.0009762	cg03063658	-0.001693	cg02935904	-0.006164	cg04875789	-0.002185	cg09687025	-0.002931	cg27533237	-0.007639	cg07431286	-0.003978	cg00178897	-0.004685	cg20211816	-0.005216	cg03176917	-0.003039	cg16729690	-0.003851
ch.X.108297408F	-0.001351	cg11334818	-0.002051	cg03196720	-0.000432	cg04454073	-0.003686	cg01282174	-0.0009761	cg06288696	-0.001693	cg04907257	-0.006164	cg08251901	-0.002185	cg21013866	-0.00293	cg09828257	-0.007638	cg16265599	-0.003978	cg05993488	-0.004685	cg00049440	-0.005215	cg10958487	-0.003039	cg21946006	-0.00385
cg07219667	-0.00135	cg25314520	-0.002049	cg13580286	-0.000432	cg21158502	-0.003686	cg21145624	-0.0009761	cg16069986	-0.001693	cg18351406	-0.006162	cg13486755	-0.002185	cg14858267	-0.002929	cg25157874	-0.007638	cg26345216	-0.003977	cg17864044	-0.004684	cg16265599	-0.005215	cg14640481	-0.003039	cg13623135	-0.003848
cg13683218	-0.00135	cg06498720	-0.002048	cg23829102	-0.000432	cg05611779	-0.003682	cg15207742	-0.0009752	cg18800827	-0.001693	cg04152629	-0.00616	cg13495369	-0.002185	cg00599559	-0.002926	cg09808176	-0.007637	cg01570551	-0.003974	cg19681956	-0.004682	cg23346544	-0.005213	cg15677293	-0.003039	cg07714565	-0.003846
cg14284618	-0.00135	cg12236164	-0.002048	cg25812424	-0.000432	cg14744768	-0.003682	cg07408456	-0.0009748	cg23045594	-0.001693	cg15786837	-0.00616	cg11786870	-0.002184	cg00577865	-0.002925	cg12627700	-0.007636	cg16655905	-0.003973	cg21933859	-0.004676	cg06732666	-0.005212	cg16468729	-0.003039	cg02096916	-0.003845
cg20943039	-0.00135	cg26299194	-0.002048	cg05457273	-0.0004319	cg16066219	-0.003682	cg24395801	-0.0009747	cg01799588	-0.001692	cg20805367	-0.006159	cg02239968	-0.002183	cg17463149	-0.002925	cg15698066	-0.007634	cg18678185	-0.003973	cg01443426	-0.004675	cg16488098	-0.005212	cg21785847	-0.003039	cg07469594	-0.003845
cg24804544	-0.00135	cg06861572	-0.002047	cg15126544	-0.0004318	cg20660171	-0.003682	cg17883458	-0.0009745	cg17329287	-0.001691	cg12693595	-0.006157	cg11334818	-0.002182	cg02323277	-0.002922	cg23131007	-0.007634	cg24700222	-0.00397	cg06057141	-0.004675	cg21010450	-0.005211	cg02283436	-0.003038	cg20222376	-0.003843
cg07303801	-0.001349	cg09677252	-0.002047	cg21369231	-0.0004314	cg01301282	-0.00368	cg24700222	-0.0009743	cg18258224	-0.001691	cg06929846	-0.006151	cg06618629	-0.002181	cg08130179	-0.002921	cg12480903	-0.007632	ch.X.747556F	-0.00397	cg26685941	-0.004672	cg26031127	-0.005211	cg13299776	-0.003038	cg10384373	-0.003839
cg17776267	-0.001349	cg09851545	-0.002047	cg16342115	-0.0004313	cg12591315	-0.003679	cg16288248	-0.0009741	cg22863523	-0.001691	cg25238537	-0.006148	cg08554257	-0.002179	cg12139725	-0.002921	cg12913097	-0.00763	cg17026879	-0.003968	cg19037922	-0.004671	cg10131972	-0.00521	cg10555297	-0.003037	cg11500660	-0.003839
cg23564243	-0.001349	cg12526834	-0.002046	cg25314520	-0.0004313	cg07554329	-0.003678	cg16069986	-0.000974	cg00117172	-0.00169	cg14215459	-0.006142	cg11118413	-0.002179	cg23261343	-0.00292	cg10099799	-0.007629	cg10449866	-0.003967	cg08194009	-0.004669	cg09379627	-0.005206	cg26342671	-0.003037	cg18575770	-0.003839
cg27616227	-0.001349	cg00525011	-0.002045	cg26668989	-0.0004313	cg20979153	-0.003678	cg19623237	-0.0009739	cg14609729	-0.00169	cg04620418	-0.006138	cg12256688	-0.002179	cg03213374	-0.002919	cg17094171	-0.007629	cg08424184	-0.003966	cg23291136	-0.004669	cg22793735	-0.005206	cg26425669	-0.003035	cg18943383	-0.003839
cg05065989	-0.001348	cg00768993	-0.002045	cg25179291	-0.0004312	cg12169977	-0.003676	cg19493077	-0.0009736	cg03117005	-0.001689	cg17342973	-0.006138	cg15462501	-0.002178	cg18952647	-0.002919	cg14900388	-0.007628	cg11567001	-0.003963	ch.X.42854404F	-0.004669	cg16801374	-0.005205	cg21758133	-0.003034	cg00293940	-0.003838
cg05656364	-0.001348	cg24409539	-0.002045	cg05551979	-0.000431	cg25746764	-0.003676	ch.X.87262228F	-0.0009736	cg06976598	-0.001688	cg10741369	-0.006137	cg18623980	-0.002178	cg09887589	-0.002918	cg13676119	-0.007622	cg14613470	-0.003963	cg16411883	-0.004668	cg19943000	-0.005205	cg00085493	-0.003033	cg02151609	-0.003838
cg24554061	-0.001348	cg25316769	-0.002045	cg21861151	-0.000431	cg06567342	-0.003675	cg16312514	-0.0009733	cg10046620	-0.001688	cg16468729	-0.006137	cg26069719	-0.002178	cg00785738	-0.002916	cg00473462	-0.007621	cg20000812	-0.003963	cg26059078	-0.004668	cg21210224	-0.005205	cg15847989	-0.003033	cg14755831	-0.003838
cg04933208	-0.001347	cg26597727	-0.002045	cg23254047	-0.0004309	cg03370270	-0.003673	cg22297146	-0.0009733	cg04788288	-0.001687	cg25737323	-0.006137	cg27141898	-0.002178	cg07190763	-0.002916	cg19576806	-0.007621	cg27322556	-0.003962	cg07229076	-0.004667	cg02462195	-0.005204	cg07001963	-0.003032	cg16395953	-0.003838
cg05162750	-0.001347	cg05639912	-0.002044	cg00498691	-0.0004308	cg21603615	-0.003673	cg23606623	-0.0009732	cg06952752	-0.001687	cg05103387	-0.006135	cg02934221	-0.002177	cg11983576	-0.002916	cg21158502	-0.007616	cg24530116	-0.003961	cg15085899	-0.004667	cg21032292	-0.005203	cg12591315	-0.003032	cg22973789	-0.003834
cg06029700	-0.001347	cg14704758	-0.002044	cg10452704	-0.0004308	cg05626764	-0.003668	cg25923450	-0.0009731	cg11395955	-0.001686	cg03805475	-0.006134	cg18179075	-0.002177	cg22732101	-0.002916	cg09441873	-0.007615	cg20384898	-0.003959	cg16653495	-0.004663	cg05977551	-0.005202	cg14976276	-0.003029	cg23244022	-0.003833
cg16852892	-0.001347	cg27091643	-0.002044	cg21172377	-0.0004308	cg12961059	-0.003666	cg14353956	-0.0009727	cg18151987	-0.001686	cg17463149	-0.006133	cg18665871	-0.002177	cg24859937	-0.002916	cg18486102	-0.007614	cg27140247	-0.003959	cg03104704	-0.004662	cg02719245	-0.005201	cg19431881	-0.003029	cg03648679	-0.003832
cg13554207	-0.001346	cg01469887	-0.002043	cg22628281	-0.0004306	cg15556943	-0.003666	cg19081437	-0.0009727	cg25478113	-0.001685	cg22069588	-0.006132	cg23261919	-0.002176	cg05084827	-0.002914	cg17818724	-0.00761	cg04309911	-0.003958	cg15203735	-0.004661	cg16762778	-0.005201	cg03871675	-0.003026	cg26856080	-0.003831
cg17466891	-0.001346	cg01535630	-0.002043	cg14529331	-0.0004305	cg07097925	-0.003664	cg13889934	-0.0009722	cg27138204	-0.001685	cg01981762	-0.00613	cg00804078	-0.002175	cg15141592	-0.002914	cg21682474	-0.00761	cg17296588	-0.003958	cg07726156	-0.004653	cg16786315	-0.005201	cg05037068	-0.003025	cg08055087	-0.00383
cg21039708	-0.001346	cg04597532	-0.002043	cg04907257	-0.0004304	cg16958524	-0.003664	cg01077102	-0.0009718	cg05962325	-0.001684	cg12034943	-0.00613	cg08774969	-0.002174	cg15462501	-0.002914	cg04917181	-0.007609	cg14514600	-0.003955	cg04682088	-0.004652	cg18655657	-0.005201	cg05747376	-0.003024	cg22370480	-0.00383
cg21256649	-0.001346	cg06518779	-0.002043	cg24906525	-0.0004303	cg22467129	-0.003664	cg12384572	-0.0009718	cg06388350	-0.001684	cg06213463	-0.006129	cg23316987	-0.002174	cg22220165	-0.002914	cg09166091	-0.007609	cg23726566	-0.003955	cg25702780	-0.004651	cg21151432	-0.005201	cg07639472	-0.003024	cg02298094	-0.003829
cg10673740	-0.001345	cg22729726	-0.002043	cg03123370	-0.0004299	cg22043634	-0.003663	cg13404421	-0.0009716	cg07076509	-0.001683	cg22192489	-0.006129	cg01538166	-0.002173	cg25936054	-0.002914	cg22112051	-0.007608	cg27188703	-0.003955	cg09355771	-0.00465	cg16103712	-0.0052	cg15923947	-0.003024	cg07042014	-0.003829
cg11872321	-0.001345	cg18352516	-0.002042	cg15057442	-0.0004298	cg02667677	-0.003662	cg24906992	-0.0009716	cg05783290	-0.001682	cg16498913	-0.006128	cg11019430	-0.002172	cg10558616	-0.002913	cg00981594	-0.007607	cg00603871	-0.003953	cg13568950	-0.00465	cg22564433	-0.005199	cg06029700	-0.003023	cg20559000	-0.003829
cg24155190	-0.001345	cg02298094	-0.002041	cg23978504	-0.0004298	cg15478817	-0.003662	cg18032190	-0.0009715	cg06637893	-0.001682	cg00282704	-0.006127	cg08130572	-0.002171	cg19752722	-0.002913	cg17317962	-0.007603	cg03104704	-0.003953	ch.X.108369489R	-0.004647	cg23464619	-0.005195	ch.X.382657R	-0.003023	cg24548833	-0.003828
cg12224508	-0.001344	cg07677930	-0.002041	cg00890041	-0.0004296	cg10501828	-0.003661	cg10425827	-0.0009714	cg13442299	-0.001682	cg26457761	-0.006123	cg18389933	-0.002171	cg07647825	-0.002911	cg02939019	-0.007602	cg16681597	-0.003951	cg12038696	-0.004642	cg20778582	-0.005194	cg21944443	-0.003022	cg20383155	-0.003827
cg16291657	-0.001344	cg19135706	-0.002039	cg24393316	-0.0004296	cg12681001	-0.003661	cg11185452	-0.0009706	cg16612998	-0.001682	cg25165932	-0.006122	cg20561863	-0.002171	cg21210224	-0.00291	cg18943693	-0.007602	cg07056079	-0.003948	cg08279184	-0.004639	cg02194789	-0.005192	cg22901226	-0.003022	cg21433125	-0.003827
cg16583330	-0.001344	cg05667348	-0.002038	cg05673882	-0.0004295	cg16758037	-0.003661	cg18532727	-0.0009706	cg24270191	-0.001682	cg21402832	-0.00612	cg06361405	-0.00217	cg21269934	-0.002909	cg06251289	-0.007601	cg14215459	-0.003945	cg11788465	-0.004637	cg14823389	-0.005189	cg11770663	-0.003021	cg13203223	-0.003825
cg27659787	-0.001344	cg10536999	-0.002038	cg08205700	-0.0004294	cg01901107	-0.003658	cg19578388	-0.0009706	cg15537269	-0.001681	cg01872216	-0.006119	cg22016779	-0.00217	cg08218061	-0.002908	cg25255293	-0.007598	cg02610486	-0.003942	cg20873416	-0.004634	ch.X.87262228F	-0.005189	ch.X.23343928R	-0.00302	cg17287553	-0.003825
ch.X.23343928R	-0.001344	cg10585371	-0.002037	cg21037184	-0.0004293	cg04513006	-0.003658	cg02533289	-0.0009698	cg23224090	-0.001681	cg15013019	-0.006115	cg21789280	-0.002169	cg20943039	-0.002908	ch.X.94051109R	-0.007597	cg19868593	-0.003942	cg14107883	-0.004632	cg15079315	-0.005186	cg08317263	-0.003019	cg17475456	-0.003823
cg00498591	-0.001343	cg16084872	-0.002037	cg24634593	-0.0004292	cg15563027	-0.003658	cg06193723	-0.0009695	cg27624424	-0.001681	cg00232402	-0.006113	cg14547067	-0.002168	cg27118035	-0.002908	cg20933634	-0.007588	cg26762347	-0.003942	cg18352516	-0.004628	cg22606224	-0.005186	cg09956907	-0.003019	cg04153241	-0.003822
cg00948275	-0.001343	cg19787727	-0.002037	cg00792107	-0.0004289	cg15203735	-0.003655	cg01463153	-0.0009693	cg06118999	-0.00168	cg13483882	-0.006113	cg17475456	-0.002167	cg27189973	-0.002907	cg06334284	-0.007587	cg09398924	-0.003939	cg14830371	-0.004627	cg23416740	-0.005186	cg17163527	-0.003018	cg04614997	-0.003822
cg11082691	-0.001343	cg21034023	-0.002037	cg13828183	-0.0004288	cg22289831	-0.003654	cg26064634	-0.000969	cg13543854	-0.00168	cg16303129	-0.00611	cg22793735	-0.002167	cg00289125	-0.002906	cg15988792	-0.007587	cg10633838	-0.003939	cg27045447	-0.004626	cg17522249	-0.005185	cg23731184	-0.003017	cg07408552	-0.003822
cg21238414	-0.001343	cg23165899	-0.002037	cg23201549	-0.0004286	cg08441931	-0.003653	cg22112051	-0.0009686	cg16173191	-0.00168	cg10413944	-0.006108	cg23336905	-0.002167	cg00738869	-0.002906	cg14639897	-0.007585	cg10923346	-0.003938	cg14239366	-0.004624	cg11082691	-0.005184	cg04465078	-0.003016	cg14956327	-0.003821
cg02097309	-0.001342	cg05742308	-0.002036	cg23999695	-0.0004285	cg20999912	-0.003652	cg04144394	-0.0009683	cg18450254	-0.00168	cg07382923	-0.006105	cg07989221	-0.002166	cg01453441	-0.002906	cg07701237	-0.007582	cg27347290	-0.003936	cg15579148	-0.004622	cg19422030	-0.005183	cg06954761	-0.003014	cg15348972	-0.003819
cg03190505	-0.001342	cg07924703	-0.002036	cg25135018	-0.0004284	cg21682474	-0.003652	cg07413609	-0.0009683	cg22016779	-0.00168	cg14841337	-0.006104	cg18486102	-0.002166	cg09148649	-0.002905	cg05983315	-0.00758	cg08481112	-0.003935	cg23684521	-0.004621	cg23000808	-0.005183	cg15036616	-0.003014	cg21933859	-0.003819
cg10966876	-0.001342	cg24259629	-0.002036	cg26299194	-0.0004284	cg15013019	-0.00365	cg11441379	-0.0009683	cg08647349	-0.001679	cg04640675	-0.006102	cg04616691	-0.002165	cg08999915	-0.002903	cg00145177	-0.007578	cg20108908	-0.003934	cg27503573	-0.004621	cg13145750	-0.005178	cg14607407	-0.003013	cg14041069	-0.003815
cg12361223	-0.001342	cg11870037	-0.002035	cg22734086	-0.0004283	cg25241964	-0.00365	cg20129717	-0.000968	cg09930033	-0.001679	cg18181571	-0.006102	cg16293631	-0.002165	cg13668544	-0.0029	cg06818710	-0.007578	cg22083639	-0.003933	cg24882673	-0.00462	cg17398233	-0.005178	cg19058189	-0.003013	cg12060472	-0.003814
cg13814485	-0.001342	cg16544399	-0.002035	cg09511427	-0.0004282	cg11936643	-0.003648	cg07245225	-0.0009678	cg12390895	-0.001679	cg04728480	-0.0061	cg00109076	-0.002164	cg14022057	-0.0029	cg18552380	-0.007578	cg24862483	-0.003933	cg10502118	-0.004618	cg18756545	-0.005178	cg03059112	-0.003012	cg10817615	-0.003813
cg18800827	-0.001342	cg06478823	-0.002033	cg13620034	-0.000428	cg17467525	-0.003648	cg15488194	-0.0009675	cg21217423	-0.001679	cg14022057	-0.006099	cg11859584	-0.002164	cg05608844	-0.002899	cg27647594	-0.007575	cg24580071	-0.003932	cg12060472	-0.004618	cg00029826	-0.005176	cg05396731	-0.003012	cg06433658	-0.003812
cg04845871	-0.001341	cg10112017	-0.002033	cg13518792	-0.0004279	cg14767790	-0.003647	cg16248783	-0.0009675	cg27355724	-0.001679	cg26473818	-0.006098	cg13795448	-0.002163	cg11789612	-0.002899	cg18261069	-0.00757	cg26906217	-0.003932	cg18759693	-0.004618	cg21635953	-0.005176	cg08751352	-0.003012	cg15579148	-0.003808
cg15890754	-0.001341	cg03379131	-0.002032	cg13621679	-0.0004278	cg15056288	-0.003646	cg02237629	-0.0009671	cg03594822	-0.001678	cg12753787	-0.006097	cg01202265	-0.002162	cg17419623	-0.002898	cg26911220	-0.00757	ch.X.42854404F	-0.003931	cg08869273	-0.004617	cg23085343	-0.005175	cg26465214	-0.003012	cg22564433	-0.003808
cg23590202	-0.001341	cg17862152	-0.002032	cg17965712	-0.0004277	cg14689324	-0.003645	cg24349631	-0.0009668	cg05000748	-0.001678	cg17173451	-0.006097	cg01282174	-0.002162	cg01725199	-0.002896	cg03085712	-0.007568	cg06980547	-0.00393	cg01272081	-0.004616	cg10114372	-0.005174	cg02108623	-0.003011	cg02156712	-0.003807
cg03263514	-0.00134	cg19453181	-0.002032	cg13504993	-0.0004274	cg14579997	-0.003644	cg07844931	-0.0009665	cg12431483	-0.001677	cg09278098	-0.006095	cg04710402	-0.002162	cg13849454	-0.002896	cg11606461	-0.007568	cg17475456	-0.00393	cg01447281	-0.004615	cg19894943	-0.005174	cg09166091	-0.003011	cg20301308	-0.003806
cg12462705	-0.00134	cg01202265	-0.002031	cg02567488	-0.0004273	cg24771266	-0.003644	cg23470850	-0.0009662	cg13234848	-0.001676	cg21968765	-0.006094	cg09975620	-0.002161	cg05032934	-0.002895	cg06148118	-0.007567	cg09197895	-0.003928	cg13482308	-0.004615	cg25491558	-0.005173	cg16317961	-0.003008	cg05318142	-0.003805
cg13836638	-0.00134	cg04999479	-0.002031	cg26052635	-0.0004272	cg06274671	-0.003643	cg12706425	-0.0009661	cg16650717	-0.001676	cg10293422	-0.006093	cg15678844	-0.002161	cg14552401	-0.002895	cg18749015	-0.007566	cg19051416	-0.003928	cg08726298	-0.004614	cg18499530	-0.005172	cg17895254	-0.003008	cg06604467	-0.003804
cg19752722	-0.00134	cg09307284	-0.00203	cg11672054	-0.000427	cg04737114	-0.003642	cg00446414	-0.0009659	cg04051571	-0.001675	cg25491558	-0.006093	cg10948359	-0.002159	cg07304536	-0.002894	cg02163885	-0.007565	cg04329105	-0.003925	cg06451739	-0.004613	cg14060111	-0.00517	cg00520933	-0.003006	cg14823389	-0.003804
cg25076459	-0.00134	cg09781601	-0.00203	cg04508482	-0.0004269	cg09707262	-0.003642	cg23436960	-0.0009654	cg16881676	-0.001675	cg12352038	-0.006092	cg19871940	-0.002159	cg12105450	-0.002893	cg09777344	-0.007565	cg19120897	-0.003925	cg12656077	-0.004613	cg15923947	-0.00517	cg15069926	-0.003004	cg24076474	-0.003804
cg27014927	-0.00134	cg06818710	-0.002029	cg17864044	-0.0004268	cg25064331	-0.003642	cg18479593	-0.0009651	cg21468825	-0.001675	cg05892030	-0.006091	cg07442907	-0.002158	cg24922129	-0.002892	cg22416703	-0.007565	cg26686147	-0.003925	cg00473462	-0.004612	cg06962913	-0.005168	cg08792995	-0.003001	cg25959239	-0.003804
cg15034393	-0.001339	cg10695848	-0.002029	cg11342670	-0.0004266	cg12840248	-0.003641	cg08190928	-0.0009645	cg00977110	-0.001674	cg12081946	-0.006091	cg16326242	-0.002157	cg27563952	-0.002892	cg11152384	-0.007563	cg08564661	-0.003924	cg12359279	-0.004612	cg00462107	-0.005166	cg01202265	-0.003	cg07996255	-0.003803
cg21402832	-0.001339	cg16521978	-0.002029	cg23520930	-0.0004263	cg17449851	-0.00364	cg07382943	-0.0009642	cg01301282	-0.001674	cg22782986	-0.006091	cg18709545	-0.002157	cg00981594	-0.00289	cg03824122	-0.00756	cg22349573	-0.003924	cg06679694	-0.004611	cg08873805	-0.005166	cg08349497	-0.003	cg07173275	-0.003801
cg09063944	-0.001338	cg03476007	-0.002028	cg07989221	-0.0004261	cg15289427	-0.003638	cg14597214	-0.0009642	cg09386954	-0.001674	cg19006127	-0.006089	cg02775846	-0.002156	cg10393598	-0.002888	cg23254047	-0.00756	cg26061357	-0.003924	cg06958537	-0.004611	cg03254465	-0.005164	cg04328477	-0.002999	cg21865533	-0.003801
cg10576725	-0.001338	cg09228833	-0.002028	cg05886626	-0.0004259	cg00218447	-0.003637	cg05435286	-0.0009641	cg13322063	-0.001674	cg13195895	-0.006086	cg08314021	-0.002156	cg13062301	-0.002887	cg02057833	-0.007558	cg26083396	-0.003924	cg00785738	-0.00461	cg07304536	-0.005164	cg23583920	-0.002999	cg08062469	-0.0038
cg11723397	-0.001338	cg17020834	-0.002028	cg13362637	-0.0004257	cg21787386	-0.003637	cg13166888	-0.0009641	cg04751035	-0.001673	cg04525943	-0.006082	cg08828594	-0.002156	cg19102771	-0.002887	cg14335782	-0.007556	cg13015042	-0.003922	cg03059112	-0.00461	cg18701481	-0.005163	cg20570410	-0.002998	cg06491116	-0.003799
cg24727480	-0.001338	cg19176391	-0.002028	cg26426447	-0.0004256	cg13496838	-0.003636	cg04689023	-0.0009639	cg14614563	-0.001673	cg14900388	-0.006081	cg10169869	-0.002155	cg05000748	-0.002886	cg06114471	-0.007554	cg18290075	-0.003922	cg13453904	-0.00461	cg06014401	-0.005162	cg23204296	-0.002998	cg08528778	-0.003798
cg13458645	-0.001336	cg13442299	-0.002026	cg07678904	-0.0004255	cg21393421	-0.003635	cg06358970	-0.0009631	cg20879085	-0.001673	cg13088406	-0.006079	cg10423607	-0.002155	cg17862152	-0.002886	cg08774969	-0.007552	cg13299776	-0.003919	ch.X.747556F	-0.00461	cg17104258	-0.005162	cg27541515	-0.002998	cg05067125	-0.003797
cg16561266	-0.001336	cg16585827	-0.002026	cg00351011	-0.0004254	cg27626141	-0.003635	cg23012579	-0.0009626	cg23588086	-0.001673	cg02017450	-0.006078	cg12628061	-0.002155	cg18362509	-0.002886	cg25702780	-0.007552	cg17864044	-0.003919	cg04799181	-0.004608	cg06998282	-0.005161	cg09591286	-0.002996	cg18352516	-0.003797
cg18844210	-0.001336	cg12224508	-0.002025	cg20169506	-0.0004253	cg05317714	-0.003634	cg02085210	-0.0009611	cg02194789	-0.001672	cg09486861	-0.006078	cg24228112	-0.002154	cg19859698	-0.002886	cg24878755	-0.007551	cg02303361	-0.003918	cg16223546	-0.004608	cg21158502	-0.005161	cg16443455	-0.002996	cg26964061	-0.003797
cg21413754	-0.001336	cg09017941	-0.002024	cg07147364	-0.0004251	cg23214464	-0.003634	cg27189973	-0.0009609	cg04174211	-0.001672	cg23328050	-0.006078	cg26988138	-0.002154	cg10110083	-0.002883	cg09429735	-0.007548	cg04509074	-0.003918	cg09865339	-0.004607	cg00807586	-0.00516	cg00029826	-0.002995	cg12551029	-0.003795
cg22758697	-0.001336	cg11879741	-0.002024	cg08196553	-0.0004251	cg14919554	-0.003632	cg11622008	-0.0009607	cg03563146	-0.001671	cg24685006	-0.006078	cg05584950	-0.002153	cg08604594	-0.002881	cg26642510	-0.007547	cg04522531	-0.003918	cg19190217	-0.004607	cg08241307	-0.00516	cg26189983	-0.002995	cg20211816	-0.003795
cg24675098	-0.001336	cg09672358	-0.002022	cg13236881	-0.0004249	cg15120477	-0.003632	cg14598950	-0.0009607	cg08938793	-0.001671	cg09760908	-0.006077	cg17147211	-0.002152	cg12180270	-0.002881	cg19192223	-0.007546	cg26685941	-0.003918	cg09011597	-0.004605	cg27453365	-0.00516	cg05382797	-0.00299	cg15330117	-0.003793
ch.X.1023208F	-0.001336	cg22349573	-0.002022	cg01395533	-0.0004244	cg09774610	-0.003631	cg00526791	-0.0009603	cg01016521	-0.00167	cg20401521	-0.006077	cg19157329	-0.002151	cg02855983	-0.00288	cg03716591	-0.007545	cg15784124	-0.003917	cg14822966	-0.004605	cg09258479	-0.005159	cg17405840	-0.002989	cg13098318	-0.003792
cg02905198	-0.001335	cg26201952	-0.002022	cg10489124	-0.0004243	cg18187680	-0.003631	cg25012219	-0.0009602	cg03379131	-0.001669	cg02493939	-0.006076	cg12590051	-0.002149	cg25347264	-0.00288	cg11491749	-0.007543	cg26566415	-0.003917	cg16072192	-0.004603	cg07282058	-0.005158	cg02043070	-0.002986	cg17463149	-0.003792
cg00196671	-0.001334	cg05330668	-0.00202	cg26924496	-0.0004243	cg09386954	-0.00363	cg24919972	-0.0009601	cg26956245	-0.001669	cg24276681	-0.006076	cg15251374	-0.002149	cg25757115	-0.00288	cg12275348	-0.007541	cg04799181	-0.003916	cg18483529	-0.004603	cg25522149	-0.005158	cg02380531	-0.002986	cg20577205	-0.00379
cg04822330	-0.001334	cg07678904	-0.00202	cg04685228	-0.0004242	cg25851152	-0.003629	cg26718354	-0.0009599	cg11858226	-0.001668	cg04246763	-0.006074	cg06069310	-0.002148	cg04685228	-0.002879	cg20660171	-0.00754	cg10695848	-0.003916	cg26566415	-0.004602	cg02821342	-0.005157	cg11595135	-0.002986	cg21573047	-0.00379
cg08378017	-0.001334	cg14443953	-0.00202	cg19536652	-0.0004242	cg12105450	-0.003628	cg26932441	-0.0009598	cg17974684	-0.001668	cg25513173	-0.006074	cg11861709	-0.002147	cg05026135	-0.002879	cg05295671	-0.007538	cg18796523	-0.003916	cg03884592	-0.004601	cg05681826	-0.005156	cg14707269	-0.002986	cg22046408	-0.00379
cg18148130	-0.001334	cg00041084	-0.002019	cg11624479	-0.0004241	cg07951978	-0.003627	cg14430111	-0.0009596	cg04908588	-0.001667	cg22104578	-0.006073	cg25287257	-0.002147	cg06980547	-0.002879	cg09849472	-0.007538	cg02821342	-0.003914	cg06245338	-0.004601	cg01724607	-0.005155	cg17303756	-0.002985	cg22505962	-0.00379
cg03651478	-0.001333	cg05314679	-0.002019	cg21073859	-0.0004241	cg12436196	-0.003625	cg11194994	-0.0009594	cg08879559	-0.001667	cg24155190	-0.006073	cg24948962	-0.002146	cg21487261	-0.002879	cg07056079	-0.007537	cg08514735	-0.003914	cg13301933	-0.004601	cg08945395	-0.005154	cg17856830	-0.002985	cg09048530	-0.003788
cg04922566	-0.001333	cg03584113	-0.002018	cg14597214	-0.0004239	cg12067687	-0.003624	cg22664064	-0.0009593	cg16379337	-0.001667	cg26465214	-0.006072	cg02129603	-0.002145	cg19253827	-0.002876	cg02172652	-0.007535	cg08720517	-0.003914	cg18756580	-0.004599	cg01383890	-0.005153	cg20971220	-0.002985	cg09284066	-0.003788
cg06320134	-0.001333	cg11482422	-0.002018	cg18250846	-0.0004235	cg00083262	-0.003623	cg24035962	-0.000959	cg16715194	-0.001667	cg02294764	-0.006067	cg09307284	-0.002145	cg20283670	-0.002876	cg11567001	-0.007533	cg17265729	-0.003913	cg16036142	-0.004597	cg15031106	-0.005152	cg23137531	-0.002985	cg22385231	-0.003788
cg09420439	-0.001333	cg18716164	-0.002018	cg25681618	-0.0004234	cg01720186	-0.003622	cg11756095	-0.0009589	cg16953473	-0.001667	cg11029634	-0.006064	cg15225091	-0.002145	cg10706230	-0.002875	cg23261919	-0.007533	cg07161369	-0.003912	cg04635642	-0.004596	cg15534084	-0.005151	cg08787401	-0.002983	cg23723105	-0.003788
cg13703049	-0.001333	cg24797187	-0.002018	cg22156700	-0.0004232	cg12829325	-0.003622	cg24984818	-0.0009588	cg01954531	-0.001666	cg22730029	-0.006064	cg22001496	-0.002145	cg15617019	-0.002875	cg17839721	-0.00753	cg10166205	-0.003912	cg09756482	-0.004596	cg18131141	-0.005151	cg09745440	-0.002983	cg26666107	-0.003788
cg22730004	-0.001333	cg16076038	-0.002017	cg24210478	-0.0004232	cg22973789	-0.003621	cg01597480	-0.0009584	cg05643592	-0.001666	cg17688837	-0.006063	cg25741023	-0.002144	cg11382133	-0.002874	cg26530485	-0.007528	cg11026555	-0.003912	cg12030002	-0.004596	cg07963497	-0.00515	cg22704326	-0.002983	cg04056179	-0.003786
cg02237629	-0.001332	cg18107827	-0.002017	cg00719626	-0.0004231	cg00785738	-0.003618	cg04596060	-0.0009584	cg09138445	-0.001666	cg09331335	-0.006062	cg02163885	-0.002143	cg11406050	-0.002873	cg12706425	-0.007527	cg21008828	-0.003911	cg08229199	-0.004593	cg23562406	-0.00515	cg05864868	-0.002982	cg27322556	-0.003786
cg13289884	-0.001332	cg22589161	-0.002017	cg02909379	-0.0004229	cg09792881	-0.003618	cg22734086	-0.000958	cg23833896	-0.001666	cg22156842	-0.006062	cg12691534	-0.002143	cg20610511	-0.002873	cg19397128	-0.007526	cg26621088	-0.003911	cg22893248	-0.004592	cg06478823	-0.005148	cg06247283	-0.002982	cg26468430	-0.003785
cg00143045	-0.001331	cg25694349	-0.002017	cg07017477	-0.0004229	cg06562570	-0.003617	cg23347429	-0.000958	cg24144853	-0.001666	cg13939204	-0.006056	cg21793948	-0.002143	cg11342670	-0.00287	cg01481989	-0.007525	cg20544372	-0.00391	cg01329010	-0.004591	cg21486659	-0.005148	cg12014333	-0.002981	cg05289394	-0.003783
cg07431229	-0.00133	cg26332926	-0.002017	cg12002589	-0.0004228	cg07251193	-0.003616	cg09072408	-0.0009575	cg24226281	-0.001666	cg00577865	-0.006054	cg19893132	-0.002142	cg16290275	-0.00287	cg16265599	-0.007525	cg03431918	-0.003908	cg17907238	-0.004591	cg04843775	-0.005147	cg12244544	-0.002981	cg27216998	-0.003783
cg12840248	-0.00133	cg04018288	-0.002016	cg14191360	-0.0004227	cg25095814	-0.003616	cg16103834	-0.0009574	cg27626102	-0.001666	cg06375761	-0.006054	cg07408456	-0.002141	cg12753787	-0.002869	cg01645729	-0.007524	cg18320188	-0.003906	cg06782849	-0.00459	cg10413944	-0.005147	cg18182358	-0.002981	cg11225410	-0.00378
cg02156680	-0.001329	cg16610086	-0.002016	cg00448752	-0.0004225	cg00508543	-0.003614	cg02656741	-0.000957	cg10658438	-0.001665	cg24154161	-0.006054	cg21251385	-0.002141	cg12777520	-0.002869	cg23224120	-0.007524	cg23090632	-0.003906	cg14155397	-0.00459	cg00343092	-0.005146	cg03276956	-0.00298	cg08170757	-0.003778
cg06576119	-0.001329	cg14288091	-0.002015	cg07431229	-0.0004225	cg07139440	-0.003613	cg09107912	-0.0009568	cg20729301	-0.001665	cg04597532	-0.006048	cg03117005	-0.00214	cg11067013	-0.002867	cg22568403	-0.007518	cg12048425	-0.003905	cg17661462	-0.004587	cg12137530	-0.005146	cg24169915	-0.002979	cg18947951	-0.003778
cg09669930	-0.001329	cg04756279	-0.002014	cg09923107	-0.0004225	cg01441497	-0.00361	cg00890041	-0.0009567	cg08554257	-0.001664	cg12024828	-0.006047	cg05221664	-0.00214	cg15417798	-0.002867	cg04568797	-0.007517	cg15013019	-0.003905	cg05026135	-0.004585	cg22108259	-0.005146	cg26827987	-0.002979	cg00262446	-0.003777
cg16728516	-0.001329	cg18733255	-0.002014	cg00370293	-0.0004223	cg05628818	-0.00361	cg03922748	-0.0009567	cg17965712	-0.001664	cg15424250	-0.006047	cg17419623	-0.00214	cg17154724	-0.002867	cg07278165	-0.007517	cg11462315	-0.003903	cg09367425	-0.004585	cg10695848	-0.005145	cg17077639	-0.002978	cg23654971	-0.003776
cg18422875	-0.001329	cg01020263	-0.002013	cg02115818	-0.0004223	cg07516470	-0.00361	cg03259494	-0.0009562	cg14710552	-0.001663	cg24830619	-0.006046	cg22220165	-0.00214	cg13299776	-0.002865	cg17688837	-0.007517	cg12030002	-0.003903	cg09278098	-0.004584	cg12656077	-0.005145	cg23864210	-0.002978	cg25488697	-0.003776
cg25513173	-0.001329	cg08572535	-0.002012	cg24913868	-0.0004223	cg27300494	-0.00361	cg03270395	-0.0009557	cg12178980	-0.001662	cg13603113	-0.006039	cg13154104	-0.002139	cg01797371	-0.002864	cg05030574	-0.007516	cg05960677	-0.003902	cg01282074	-0.004583	cg20544372	-0.005143	cg27207881	-0.002978	cg06670612	-0.003775
cg01364478	-0.001328	cg08680048	-0.002011	cg18709545	-0.0004222	cg04597532	-0.003609	cg26396443	-0.0009555	cg19944876	-0.001661	cg16335762	-0.006037	cg14841337	-0.002139	cg03454397	-0.002863	cg02219997	-0.007514	cg00293245	-0.003901	cg12708336	-0.004582	cg05318142	-0.005142	cg07754492	-0.002976	cg08520451	-0.003771
cg02620361	-0.001328	cg14342532	-0.002011	cg14022913	-0.0004217	cg04266169	-0.003608	cg12572278	-0.0009554	cg08347183	-0.00166	cg04162647	-0.006036	cg17535691	-0.002139	cg04607844	-0.002863	cg24347838	-0.007514	cg03165859	-0.003901	cg03227078	-0.00458	cg22114489	-0.005142	cg15784124	-0.002976	cg06741198	-0.00377
cg06637963	-0.001328	cg11038073	-0.00201	cg17034088	-0.0004216	cg14612625	-0.003607	cg04162647	-0.0009553	cg16184035	-0.00166	cg19433091	-0.006036	cg23179456	-0.002138	cg23473904	-0.002863	cg12656077	-0.007507	cg25287071	-0.003901	cg06433658	-0.004578	cg24488739	-0.005142	cg09357438	-0.002975	cg21478137	-0.00377
cg18049030	-0.001328	cg13849454	-0.00201	cg11770663	-0.0004213	cg22865831	-0.003607	cg04464940	-0.0009552	cg09159285	-0.001659	cg24407308	-0.006036	cg03001832	-0.002137	cg10316474	-0.002862	cg00938619	-0.007506	cg01262337	-0.003897	cg15854296	-0.004577	cg24961583	-0.005142	cg12361223	-0.002975	cg03433048	-0.003769
cg25858249	-0.001328	cg13912930	-0.00201	cg24633771	-0.0004211	cg00204159	-0.003603	cg20513643	-0.0009551	cg19453181	-0.001659	cg10017888	-0.006034	cg18202336	-0.002136	cg07890490	-0.002861	cg13623135	-0.007503	cg08015883	-0.003897	cg20917083	-0.004577	cg10126874	-0.005138	cg21000447	-0.002975	cg04846710	-0.003769
cg08272151	-0.001327	cg15187550	-0.00201	cg05867154	-0.000421	cg10861005	-0.0036	cg07554329	-0.0009544	cg22415969	-0.001659	cg16174681	-0.006034	cg11406050	-0.002135	cg15751452	-0.00286	ch.X.92435715F	-0.0075	cg07654569	-0.003896	cg24066731	-0.004575	cg03140883	-0.005137	cg26728709	-0.002975	cg09137533	-0.003769
cg13932612	-0.001327	cg16394551	-0.002009	cg08369079	-0.000421	cg02129603	-0.003598	cg09956907	-0.0009541	cg27118035	-0.001659	cg01068407	-0.006031	cg19229344	-0.002135	cg23295127	-0.00286	cg21802726	-0.007499	cg10625266	-0.003896	cg13348059	-0.004574	cg04075035	-0.005129	cg10166205	-0.002972	cg07372034	-0.003768
cg23217622	-0.001327	cg26071135	-0.002009	cg23000808	-0.000421	cg05321808	-0.003598	cg24155190	-0.0009538	cg06633429	-0.001658	cg18422875	-0.006031	cg20549620	-0.002135	cg00405699	-0.002859	cg20342628	-0.007496	cg24081819	-0.003894	cg17592120	-0.004574	cg23068731	-0.005129	cg22385477	-0.002972	cg21697198	-0.003766
cg05211768	-0.001326	cg27355724	-0.002009	cg21437561	-0.0004209	cg15971836	-0.003598	cg04742550	-0.0009533	cg13445218	-0.001658	cg02304226	-0.00603	cg14823389	-0.002134	cg07781736	-0.002859	cg22352818	-0.007496	cg24932241	-0.003894	cg02001279	-0.004573	cg26874634	-0.005129	cg22409276	-0.002972	cg04829853	-0.003764
cg09467501	-0.001326	cg04084455	-0.002008	cg21710324	-0.0004209	cg01240795	-0.003597	cg23424766	-0.0009532	cg14696396	-0.001658	cg26202340	-0.00603	cg15878568	-0.002134	cg02283436	-0.002858	cg04875162	-0.007494	cg09932135	-0.003893	cg17818724	-0.004572	cg19783626	-0.005128	cg25245082	-0.002972	cg20099054	-0.003763
cg08199953	-0.001325	cg08639523	-0.002008	cg11158729	-0.0004206	cg08062469	-0.003596	cg06034933	-0.0009529	cg04030842	-0.001656	ch.X.23343928R	-0.00603	cg13537353	-0.002133	cg17052266	-0.002858	cg22598028	-0.007494	cg18552380	-0.003892	cg26991199	-0.004572	cg10489124	-0.005126	cg10413944	-0.002971	cg09164898	-0.003762
cg10975290	-0.001325	cg12384572	-0.002008	cg25157280	-0.0004206	cg04084455	-0.003595	cg05726195	-0.0009526	cg14199276	-0.001656	cg18598117	-0.006028	cg22289831	-0.002133	cg23791611	-0.002856	cg04694437	-0.007491	cg10236452	-0.003889	cg16358679	-0.00457	cg21475097	-0.005126	cg25016544	-0.00297	cg13874739	-0.003762
cg15797110	-0.001325	cg13028700	-0.002008	cg03578473	-0.0004205	cg24215070	-0.003595	cg02154956	-0.0009525	cg16568681	-0.001656	cg11858226	-0.006027	cg04187185	-0.002132	cg11026555	-0.002855	cg07673866	-0.007491	cg19397128	-0.003889	cg19076255	-0.00457	cg23089549	-0.005126	cg00489811	-0.002967	cg27495769	-0.003762
cg16342115	-0.001325	cg12580665	-0.002007	cg06585233	-0.0004204	cg05419671	-0.003594	cg03110633	-0.0009518	cg10951873	-0.001655	cg17807131	-0.006027	cg10129408	-0.002132	cg14606256	-0.002855	cg08229199	-0.007491	cg22306928	-0.003889	cg27626102	-0.00457	cg10406027	-0.005125	cg11190754	-0.002965	cg23139609	-0.003761
cg24883709	-0.001325	cg07554046	-0.002006	cg26195178	-0.0004202	cg09072408	-0.003594	cg08676425	-0.0009516	cg23989673	-0.001655	cg07216976	-0.006026	cg25104512	-0.002132	cg17997279	-0.002855	cg13590336	-0.007489	cg05822031	-0.003886	cg27558095	-0.004569	cg23590202	-0.005125	cg12664209	-0.002965	cg19493827	-0.00376
cg25150953	-0.001325	cg15092561	-0.002006	cg05698090	-0.0004201	cg10069638	-0.003594	cg05423393	-0.0009515	cg05698090	-0.001654	cg12692722	-0.006023	cg00031303	-0.002131	cg02535219	-0.002853	cg08805338	-0.007485	cg14074581	-0.003885	cg21379321	-0.004568	cg02323277	-0.005124	cg17243364	-0.002965	cg24228112	-0.00376
cg07989221	-0.001324	cg23829102	-0.002006	cg08872722	-0.0004201	cg13814485	-0.003594	cg22513169	-0.0009513	cg05974816	-0.001654	cg05724997	-0.006019	cg02364610	-0.002131	cg03628682	-0.002853	cg22703724	-0.007485	cg20778582	-0.003884	cg24222435	-0.004568	cg05893300	-0.005122	cg25771013	-0.002965	cg08302325	-0.003759
cg21007852	-0.001324	cg19669036	-0.002005	cg12920938	-0.0004201	cg23725454	-0.003594	cg07144730	-0.0009511	cg04641787	-0.001653	cg26574003	-0.006017	cg22975695	-0.002131	cg04802694	-0.002853	cg10948359	-0.007483	cg23344321	-0.003884	cg04596060	-0.004566	cg02116889	-0.005115	cg06830784	-0.002964	cg13665890	-0.003759
cg25883083	-0.001324	cg07506334	-0.002004	cg01265531	-0.00042	cg14245804	-0.003593	cg03460001	-0.0009509	cg17510056	-0.001653	cg27628536	-0.006017	cg11291081	-0.00213	cg05457273	-0.002853	cg13302559	-0.007481	cg10393598	-0.003882	cg10700424	-0.004565	cg21364560	-0.005113	cg11935153	-0.002964	cg21402832	-0.003759
cg01981762	-0.001323	cg02441647	-0.002003	cg06540146	-0.00042	cg15746696	-0.003592	cg04444761	-0.0009506	cg00570618	-0.001652	cg09159285	-0.006016	cg21279806	-0.002129	cg17397028	-0.002852	cg15916004	-0.007481	cg08704509	-0.00388	cg18204158	-0.004565	cg07363112	-0.005112	cg13619915	-0.002963	cg07220152	-0.003758
cg10888337	-0.001323	cg04302194	-0.002002	cg11469061	-0.00042	cg22727124	-0.003592	cg07127225	-0.0009505	cg04819580	-0.001651	cg09769958	-0.006015	cg01607849	-0.002128	cg02674305	-0.002851	cg22460206	-0.007479	cg02481642	-0.003879	cg27495769	-0.004564	cg13620770	-0.00511	cg02946754	-0.002962	cg26342671	-0.003754
cg22830273	-0.001323	cg20117153	-0.002002	cg04922566	-0.0004197	cg05457273	-0.003591	cg15850851	-0.0009502	cg03297163	-0.00165	cg21655280	-0.006015	cg13782932	-0.002128	cg01342196	-0.00285	cg27139956	-0.007479	cg12061357	-0.003879	cg13088406	-0.004562	cg10308629	-0.005105	cg04089426	-0.002962	cg04200607	-0.003753
cg07161369	-0.001322	cg24727480	-0.002002	cg10741369	-0.0004195	cg02364793	-0.00359	cg26579311	-0.0009502	cg05639912	-0.00165	cg13593448	-0.006014	cg03218797	-0.002127	cg23699879	-0.00285	cg03061352	-0.007475	cg12772821	-0.003879	cg05694021	-0.00456	cg11919694	-0.005105	cg07304536	-0.002962	cg19037922	-0.003753
cg11765288	-0.001322	cg02172857	-0.002001	cg21031345	-0.0004192	cg03844701	-0.00359	cg18327669	-0.0009501	cg10112391	-0.00165	cg24059154	-0.006014	cg05576648	-0.002127	cg10423607	-0.002849	cg18109838	-0.007475	cg26140475	-0.003877	cg10896862	-0.00456	cg01343313	-0.005102	cg21272913	-0.002962	cg06746360	-0.003751
cg21037265	-0.001322	cg18566883	-0.002	cg24322623	-0.0004191	cg25861285	-0.00359	cg01422262	-0.00095	cg18475643	-0.00165	cg25979598	-0.006014	cg07751641	-0.002127	cg00374492	-0.002848	cg20082170	-0.007474	cg12224633	-0.003876	cg12634932	-0.00456	cg19869746	-0.005098	cg04100595	-0.002959	cg14669921	-0.003751
cg07037112	-0.001321	cg23821329	-0.002	cg24861124	-0.0004191	cg24217844	-0.003589	cg18617679	-0.0009499	cg04581938	-0.001649	cg05087842	-0.006013	cg15247269	-0.002127	cg19111999	-0.002848	cg01068407	-0.00747	cg14609729	-0.003876	cg15626828	-0.004558	cg09138445	-0.005097	cg11462315	-0.002959	cg25554917	-0.003751
cg09680447	-0.001321	cg24685998	-0.002	cg21972382	-0.000419	cg24618492	-0.003589	cg06361238	-0.0009497	cg05031283	-0.001649	cg13597528	-0.006013	cg22827124	-0.002126	cg07971674	-0.002847	cg12868173	-0.00747	cg27317433	-0.003876	cg22763897	-0.004558	cg24526433	-0.005096	cg05807485	-0.002958	cg10825398	-0.00375
cg16339264	-0.001321	cg11299333	-0.001998	cg17593584	-0.0004189	cg11299333	-0.003588	cg06618629	-0.0009497	cg05977551	-0.001649	cg18456803	-0.006013	cg02417084	-0.002125	cg00755950	-0.002846	cg11342670	-0.007469	cg26337020	-0.003875	cg02610486	-0.004554	cg09467501	-0.005095	cg06014401	-0.002958	cg15340644	-0.003747
cg23165752	-0.001321	cg11387340	-0.001998	cg19753794	-0.0004189	cg17491987	-0.003588	cg10966876	-0.0009497	cg09740037	-0.001649	cg03297163	-0.006011	cg20684180	-0.002125	cg08067617	-0.002846	cg15911806	-0.007465	cg09056501	-0.003874	cg20203114	-0.004552	cg04890576	-0.005094	cg08580631	-0.002958	cg00107603	-0.003746
cg26131026	-0.001321	cg10651537	-0.001997	cg06369090	-0.0004188	cg11672054	-0.003587	cg15042080	-0.0009494	cg15843262	-0.001649	cg00157456	-0.00601	cg08194009	-0.002124	cg07807026	-0.002845	cg08640252	-0.007461	cg09704750	-0.003874	cg07890490	-0.004551	cg15878568	-0.005094	cg27460943	-0.002958	cg02105666	-0.003746
cg12734954	-0.00132	cg11571263	-0.001997	cg12421686	-0.0004188	cg27429749	-0.003587	cg27503573	-0.0009492	cg02870584	-0.001648	cg01966966	-0.006007	cg11402586	-0.002124	cg06235847	-0.002844	cg21893284	-0.007456	cg17861863	-0.003874	cg20042248	-0.00455	cg18448581	-0.005092	cg07693238	-0.002955	cg15032239	-0.003746
cg14071579	-0.00132	cg15996480	-0.001997	cg27398263	-0.0004188	cg11162118	-0.003586	cg26645082	-0.0009491	cg05040232	-0.001648	cg15836635	-0.006007	cg11881202	-0.002124	cg14714046	-0.002843	cg12373208	-0.007455	cg18261069	-0.003874	cg04152629	-0.004549	cg13498289	-0.005091	cg25491558	-0.002955	cg16695389	-0.003745
cg17130457	-0.00132	cg18241942	-0.001996	cg03254465	-0.0004186	cg11947493	-0.003586	cg08799922	-0.000949	cg12090740	-0.001648	cg19826026	-0.006007	cg04174211	-0.002123	cg01118078	-0.002842	cg12577010	-0.007455	cg18083704	-0.003873	cg00121533	-0.004545	cg00079563	-0.00509	cg02656741	-0.002954	cg02145932	-0.003744
cg24369185	-0.00132	cg18946473	-0.001996	cg05447833	-0.0004186	cg12582003	-0.003586	cg21487261	-0.0009485	cg06069616	-0.001647	cg23054321	-0.006005	cg06241292	-0.002123	cg07431229	-0.002839	cg13052034	-0.007455	cg06283493	-0.003872	cg10708955	-0.004545	cg19516279	-0.00509	cg15103564	-0.002954	cg10036918	-0.003744
cg24787755	-0.00132	cg22156700	-0.001996	cg11348338	-0.0004184	cg17111837	-0.003583	cg20330472	-0.0009475	cg16312514	-0.001647	cg26301565	-0.006002	cg09429735	-0.002123	cg11451801	-0.002836	cg13324746	-0.007454	cg15174823	-0.003872	cg04576568	-0.004543	cg14563196	-0.005089	cg07375367	-0.002953	cg11777890	-0.003744
cg05418487	-0.001319	cg07067241	-0.001995	cg21913319	-0.0004184	cg23089549	-0.003583	cg23181776	-0.0009475	cg07204255	-0.001645	cg01282074	-0.005999	cg17619993	-0.002123	cg14515996	-0.002836	cg23067085	-0.007452	cg07217350	-0.003869	cg13207733	-0.004542	cg02632185	-0.005087	cg16138158	-0.002952	cg06180356	-0.003743
cg09551472	-0.001319	cg18708013	-0.001995	cg23786580	-0.0004184	cg05482050	-0.003581	cg00204159	-0.0009474	cg22177364	-0.001644	cg23179456	-0.005997	cg06535993	-0.002122	cg15424250	-0.002835	cg13345957	-0.00745	cg15067827	-0.003868	cg13676119	-0.004542	cg04958411	-0.005087	cg00282704	-0.002951	cg06675784	-0.003743
cg10585371	-0.001319	cg04742550	-0.001993	cg04174211	-0.0004182	cg15985184	-0.00358	cg03648679	-0.0009474	cg26932441	-0.001644	cg08940001	-0.005993	cg18187680	-0.002122	cg23336905	-0.002834	cg19310430	-0.007446	cg13795448	-0.003866	cg01154966	-0.00454	cg22006060	-0.005087	cg14258341	-0.00295	cg05401764	-0.003741
cg20956278	-0.001319	cg14022913	-0.001992	cg00157796	-0.0004178	cg05404309	-0.003579	cg11402586	-0.0009473	cg06747888	-0.001643	cg17945323	-0.005992	cg19669036	-0.002122	cg26147668	-0.002834	cg01312858	-0.007445	cg02043070	-0.003864	cg00618312	-0.004538	cg11589932	-0.005086	cg16547579	-0.00295	cg10673740	-0.003741
cg22859289	-0.001318	cg21893284	-0.001992	cg00556132	-0.0004178	cg18664369	-0.003578	cg01751134	-0.0009463	cg07700233	-0.001643	cg06491116	-0.005991	cg08886651	-0.002121	cg11631427	-0.002833	cg10175334	-0.007444	cg00599559	-0.003863	cg17421623	-0.004536	cg27239243	-0.005084	cg26964061	-0.00295	cg04808029	-0.00374
cg04171329	-0.001317	cg15034393	-0.001991	cg25831204	-0.0004178	cg14426428	-0.003577	cg11162118	-0.000946	cg08424063	-0.001643	cg10625266	-0.005991	cg18748525	-0.002121	cg05221664	-0.002831	cg12526834	-0.007441	cg07174665	-0.003863	cg04824711	-0.004535	cg03289872	-0.005083	cg03436453	-0.002949	cg00862588	-0.003739
cg12532500	-0.001317	cg21037184	-0.001991	cg26860182	-0.0004176	cg03648679	-0.003575	cg10245915	-0.0009459	cg09483067	-0.001643	cg03662648	-0.00599	cg23583920	-0.002119	cg16398956	-0.002831	cg18945842	-0.007435	cg22114489	-0.003863	cg18892169	-0.004535	cg05443922	-0.005083	cg26988138	-0.002949	cg06805557	-0.003739
cg04743609	-0.001316	cg27202913	-0.001991	cg18855674	-0.0004175	cg12962542	-0.003574	cg07229076	-0.0009454	cg26782013	-0.001643	cg03029127	-0.005986	cg01533108	-0.002118	cg17364114	-0.002831	cg16202564	-0.007434	cg23166970	-0.003863	cg20805367	-0.004533	cg19515245	-0.005083	cg09777344	-0.002948	cg03946324	-0.003738
cg05719164	-0.001316	cg08996521	-0.00199	cg01443426	-0.0004173	cg04009254	-0.003573	cg02706110	-0.0009448	cg06447552	-0.001642	cg05694021	-0.005986	cg08587775	-0.002118	cg04596060	-0.002829	cg21364560	-0.007431	cg27647594	-0.003863	cg26052635	-0.004532	cg00686083	-0.005082	cg23982279	-0.002948	cg12403778	-0.003738
cg09740037	-0.001316	cg09297288	-0.00199	cg10112391	-0.0004171	cg07304536	-0.003569	cg04228935	-0.0009447	cg09151381	-0.001642	cg19069882	-0.005986	cg11241541	-0.002117	cg05611779	-0.002829	cg07431286	-0.007429	cg02809401	-0.00386	cg08130572	-0.004531	cg09109122	-0.005081	cg24951100	-0.002948	cg13492245	-0.003738
cg16496024	-0.001316	cg13411656	-0.00199	cg19381811	-0.0004171	cg11765288	-0.003569	cg07144296	-0.0009443	cg18900271	-0.001642	cg05624244	-0.005985	cg11185792	-0.002116	cg21481775	-0.002829	cg20222376	-0.007428	cg00362657	-0.003859	cg07211212	-0.00453	cg04194852	-0.00508	cg25095814	-0.002947	cg22513169	-0.003738
cg17083506	-0.001316	cg15559674	-0.00199	cg25369980	-0.0004171	cg14538055	-0.003569	cg26506013	-0.000944	cg23732483	-0.001642	cg01637404	-0.005984	cg04464085	-0.002115	cg16103834	-0.002828	cg26201952	-0.007428	cg11111460	-0.003859	cg11585820	-0.00453	cg04689061	-0.005079	cg01160085	-0.002946	cg25522119	-0.003737
cg25541958	-0.001316	cg22628281	-0.00199	cg27515800	-0.0004171	cg18540455	-0.003569	cg01597066	-0.0009439	cg10522125	-0.001641	cg02245794	-0.005984	cg11755107	-0.002115	cg04663932	-0.002827	cg23442621	-0.007426	cg13015908	-0.003859	cg11936643	-0.00453	cg14415616	-0.005078	cg13804316	-0.002946	cg25277534	-0.003736
cg05477024	-0.001315	cg26832142	-0.00199	cg22467129	-0.0004169	cg14558114	-0.003567	cg07303801	-0.0009438	cg00646492	-0.00164	cg09516200	-0.005984	cg16438210	-0.002115	cg01228636	-0.002825	cg01329010	-0.007423	cg01768201	-0.003857	cg18076766	-0.00453	cg17163527	-0.005077	cg05281645	-0.002945	cg17069739	-0.003734
cg14202679	-0.001315	cg11398452	-0.001989	cg05807485	-0.0004168	cg11634496	-0.003566	cg11854659	-0.0009438	cg20059012	-0.00164	cg00804078	-0.005983	cg19789466	-0.002115	cg03780561	-0.002825	cg18780769	-0.007422	cg26289880	-0.003857	cg02413850	-0.004529	cg04743609	-0.005075	cg15093194	-0.002945	cg26069514	-0.003734
cg14729148	-0.001315	cg22935456	-0.001989	cg18728325	-0.0004167	cg14950169	-0.003565	cg18224445	-0.0009436	cg23181776	-0.00164	cg15747933	-0.005983	cg23089549	-0.002115	cg05525743	-0.002825	cg07491109	-0.00742	cg02207200	-0.003854	cg07890032	-0.004529	cg09956907	-0.005075	cg12739584	-0.002944	cg07890032	-0.003732
cg21809007	-0.001315	cg07161172	-0.001988	cg20556936	-0.0004167	cg26530485	-0.003565	cg06831842	-0.0009432	ch.X.56864533F	-0.00164	cg04329105	-0.005982	cg27563048	-0.002115	cg06504526	-0.002825	cg09251466	-0.007419	cg04233717	-0.003854	cg27406919	-0.004529	cg04444771	-0.005072	cg13846866	-0.002944	cg00024989	-0.003731
cg27493151	-0.001315	cg07537734	-0.001988	cg05876174	-0.0004165	cg20464804	-0.003564	cg03584113	-0.0009431	cg20123891	-0.001639	cg08573893	-0.005982	cg12079303	-0.002114	cg11444704	-0.002825	cg13098318	-0.007416	cg17572800	-0.003854	cg01383890	-0.004527	cg13014531	-0.005072	cg13414478	-0.002943	cg11379392	-0.003729
cg01899253	-0.001314	cg17916916	-0.001988	cg07914856	-0.0004164	cg20724810	-0.003564	cg01780754	-0.0009428	cg19519331	-0.001638	ch.X.938089F	-0.005978	cg17668731	-0.002114	cg12850252	-0.002825	cg12431483	-0.007412	cg17980625	-0.003854	cg10452704	-0.004527	cg02962944	-0.00507	cg17083685	-0.002943	cg22762615	-0.003728
cg09453870	-0.001314	cg00973286	-0.001987	cg23433889	-0.0004164	cg07744166	-0.00356	cg12595016	-0.0009425	cg25179291	-0.001638	cg02466246	-0.005972	cg08110488	-0.002113	cg00164235	-0.002824	cg00586317	-0.007411	cg20956278	-0.003854	cg09669930	-0.004524	cg08205361	-0.00507	cg24828455	-0.002942	cg25741023	-0.003728
cg17649293	-0.001314	cg19392396	-0.001987	cg08675092	-0.0004162	cg12090740	-0.00356	cg14199276	-0.0009424	cg25761326	-0.001638	cg12093371	-0.005972	cg07629965	-0.002112	cg05670953	-0.002824	cg04890576	-0.007411	cg25254825	-0.003854	cg01109135	-0.004523	cg07633853	-0.005062	cg06637963	-0.00294	cg23204296	-0.003727
cg02527112	-0.001313	cg19815904	-0.001987	cg09601912	-0.0004161	cg22385477	-0.00356	cg27367871	-0.0009423	cg04812509	-0.001637	cg09222023	-0.005971	cg25255293	-0.002112	cg02624905	-0.002822	cg12195238	-0.00741	cg19124509	-0.003852	cg01312858	-0.004523	cg06180356	-0.005061	cg19904352	-0.00294	cg24681845	-0.003727
cg05869122	-0.001313	cg03196720	-0.001986	cg06358970	-0.000416	cg22046408	-0.003559	cg11521404	-0.0009421	cg05049329	-0.001637	cg01383890	-0.00597	cg05031283	-0.002111	cg04854089	-0.002822	cg06341590	-0.007409	cg22536808	-0.003851	cg10587854	-0.004523	cg00401091	-0.00506	cg22750557	-0.00294	cg26332926	-0.003727
cg06356912	-0.001313	cg11936643	-0.001986	cg13783653	-0.000416	cg27503573	-0.003559	cg25533556	-0.000942	cg05724997	-0.001637	cg05963690	-0.00597	cg05974816	-0.002111	cg05700142	-0.002822	cg07216425	-0.007409	cg00196671	-0.00385	cg17296588	-0.004523	cg09019916	-0.005058	cg22982767	-0.00294	cg20639802	-0.003726
cg14378848	-0.001313	cg20738406	-0.001986	cg20552487	-0.000416	cg10069677	-0.003558	cg16447680	-0.0009417	cg15575671	-0.001637	cg03641748	-0.005969	cg10166205	-0.002111	cg06539804	-0.002822	cg06119711	-0.007408	cg19076255	-0.00385	cg01100175	-0.004519	cg03719128	-0.005057	cg16022748	-0.002938	cg13301933	-0.003724
cg24482496	-0.001313	cg22927788	-0.001986	cg10453420	-0.0004159	cg18913890	-0.003558	cg01427769	-0.0009415	cg22975695	-0.001637	cg17087669	-0.005969	cg02567488	-0.00211	cg09197895	-0.002822	cg05064297	-0.007407	cg18155840	-0.003849	cg18564041	-0.004519	cg07902884	-0.005056	cg16729690	-0.002938	cg22606224	-0.003724
cg02017450	-0.001312	cg16624692	-0.001985	cg26046204	-0.0004159	cg03922748	-0.003557	cg27447689	-0.0009415	cg24176744	-0.001637	cg27458485	-0.005965	cg14579997	-0.00211	cg11084266	-0.002822	cg10406027	-0.007406	cg17839721	-0.003848	cg20457193	-0.004519	cg21370527	-0.005055	cg16146033	-0.002937	cg23907053	-0.003723
cg07516470	-0.001312	cg00218103	-0.001984	cg02928476	-0.0004155	cg07408456	-0.003557	cg05820312	-0.0009409	cg12152002	-0.001636	cg05611779	-0.005964	cg24535130	-0.00211	cg26014634	-0.002821	cg15264808	-0.007405	cg00549988	-0.003846	cg17793819	-0.004518	cg22615462	-0.005055	cg20100049	-0.002937	cg09522018	-0.003722
cg09530790	-0.001312	cg09537620	-0.001983	cg19899882	-0.0004155	cg02582203	-0.003556	cg13357602	-0.0009402	cg12717594	-0.001636	cg23246821	-0.005964	cg06576119	-0.002109	cg02553516	-0.00282	cg04411625	-0.007402	cg07488576	-0.003845	cg00362657	-0.004517	cg25202070	-0.005053	cg24559983	-0.002937	cg25843003	-0.003722
cg20173059	-0.001312	cg10298187	-0.001983	cg22402852	-0.0004155	cg17672050	-0.003555	cg19877419	-0.0009397	cg16142707	-0.001635	cg00151922	-0.005963	cg11414821	-0.002109	cg09486861	-0.00282	cg02767960	-0.007401	cg09828257	-0.003844	cg08797837	-0.004517	cg20414098	-0.005051	cg05697909	-0.002935	cg13088406	-0.003721
cg20863963	-0.001312	cg24883709	-0.001983	cg01138981	-0.0004154	cg03364683	-0.003553	cg27138204	-0.0009394	cg01539948	-0.001634	cg01538166	-0.005963	cg18101249	-0.002109	cg16142707	-0.00282	cg13919466	-0.007401	cg10949322	-0.003844	cg01343313	-0.004516	cg10977734	-0.00505	cg06714284	-0.002933	cg14874351	-0.003718
cg05318142	-0.001311	cg09831026	-0.001982	cg26799209	-0.0004154	cg05635730	-0.003552	cg26911220	-0.0009393	cg02871614	-0.001634	cg16521978	-0.005962	cg06573604	-0.002108	cg25652701	-0.00282	cg07217350	-0.007399	cg11416243	-0.003843	cg02897989	-0.004515	cg14707269	-0.00505	cg00723271	-0.002932	cg20681068	-0.003718
cg09355771	-0.001311	cg21046148	-0.001982	cg18632602	-0.0004152	cg05728519	-0.003552	cg11382133	-0.0009392	cg07516470	-0.001634	cg06346667	-0.005959	cg14199276	-0.002108	cg23015138	-0.002818	cg17604407	-0.007396	cg13545897	-0.003842	cg19431881	-0.004515	cg21493516	-0.00505	cg04276084	-0.002931	cg21204020	-0.003718
cg20844545	-0.001311	cg25093503	-0.001982	cg16624272	-0.0004151	cg22843446	-0.003551	cg04134048	-0.000939	cg10624054	-0.001634	cg12134570	-0.005958	cg12048425	-0.002107	cg24203709	-0.002818	cg07383443	-0.007393	cg15991262	-0.003842	cg22268760	-0.004515	cg01810953	-0.005049	cg14039237	-0.00293	cg00391696	-0.003717
cg24570303	-0.001311	cg05071212	-0.001981	cg23435746	-0.0004151	cg24488739	-0.00355	cg01210554	-0.0009388	cg11406050	-0.001634	cg19397128	-0.005958	cg15256164	-0.002107	cg09183316	-0.002817	cg06882298	-0.007391	cg17001566	-0.003842	cg00093058	-0.004512	cg06388350	-0.005048	cg14659956	-0.00293	cg07754492	-0.003717
cg27409484	-0.001311	cg05281221	-0.001981	cg10890829	-0.000415	cg26607031	-0.00355	cg18652721	-0.0009387	cg12551029	-0.001633	cg00431837	-0.005956	cg21878650	-0.002107	cg26819428	-0.002817	cg24280645	-0.007391	cg22366088	-0.003842	cg01342196	-0.004512	cg25510610	-0.005048	cg16521978	-0.00293	cg21323441	-0.003717
cg02315597	-0.00131	cg06734271	-0.001981	cg01359246	-0.0004149	cg07090138	-0.003549	cg01244650	-0.0009385	cg23054321	-0.001632	cg18214661	-0.005956	cg02500443	-0.002106	cg03110633	-0.002816	cg01443426	-0.00739	cg22402852	-0.003842	cg25183082	-0.004512	cg19868691	-0.005047	cg02694810	-0.002929	cg05280148	-0.003711
cg02031769	-0.001309	cg17673897	-0.001979	cg23214464	-0.0004149	cg18191418	-0.003549	cg05075097	-0.000938	cg04522531	-0.00163	cg17732044	-0.005952	cg04829853	-0.002106	cg21217423	-0.002816	cg24689196	-0.007389	cg02909379	-0.00384	cg08043048	-0.004511	cg03697708	-0.005046	cg20102336	-0.002929	cg07390647	-0.003711
cg02454982	-0.001309	cg26385074	-0.001977	cg03167413	-0.0004146	cg22379207	-0.003549	cg17091793	-0.0009379	cg09680447	-0.00163	cg19672993	-0.00595	cg12941374	-0.002106	cg23254047	-0.002816	cg25254825	-0.007389	cg06376522	-0.00384	cg04113075	-0.004509	cg22814884	-0.005046	cg05096436	-0.002927	cg22444610	-0.003709
cg22711676	-0.001309	cg00514628	-0.001976	cg16335762	-0.0004146	cg04685228	-0.003548	cg05143735	-0.0009375	cg11026555	-0.00163	cg24700222	-0.005949	cg19445996	-0.002106	cg27151561	-0.002816	cg05636131	-0.007384	cg04032226	-0.003839	cg08325519	-0.004509	cg19921439	-0.005045	cg16084872	-0.002927	cg07724816	-0.003708
cg27459121	-0.001308	cg11531579	-0.001976	cg02062409	-0.0004145	cg12293340	-0.003548	cg17360194	-0.0009373	cg23453435	-0.00163	cg14597214	-0.005948	cg24085895	-0.002106	cg01202265	-0.002815	cg00887511	-0.007383	cg16594165	-0.003839	cg20383155	-0.004509	cg11620066	-0.005044	cg13185030	-0.002926	cg08969593	-0.003708
cg19411474	-0.001307	cg11620984	-0.001976	cg04618333	-0.0004145	cg16521978	-0.003548	cg01954683	-0.0009372	cg24154161	-0.00163	cg18101249	-0.005946	cg05867154	-0.002104	cg11526848	-0.002815	cg15833873	-0.007379	cg20824867	-0.003839	cg05698090	-0.004508	cg17536603	-0.005043	cg06800840	-0.002925	cg24713653	-0.003707
cg19843939	-0.001307	cg23395449	-0.001976	cg11128216	-0.0004144	cg21235151	-0.003548	cg25093503	-0.000937	cg12610207	-0.001629	cg25233685	-0.005945	cg21934910	-0.002104	cg20631104	-0.002815	cg05264764	-0.007378	cg11702455	-0.003838	cg23874561	-0.004507	cg23008352	-0.005043	cg12021219	-0.002925	cg06201680	-0.003705
cg00138474	-0.001306	cg23873448	-0.001976	cg13580857	-0.0004144	cg01968525	-0.003547	cg06198190	-0.0009368	cg24862483	-0.001629	cg26140475	-0.005945	cg03025135	-0.002103	cg14351425	-0.002814	cg13981380	-0.007375	cg24582934	-0.003838	cg01357292	-0.004506	cg09382800	-0.005042	cg18374181	-0.002925	cg18555073	-0.003704
cg03209642	-0.001306	cg01477255	-0.001975	cg20028233	-0.0004143	cg12361223	-0.003547	cg01362383	-0.0009367	cg24567694	-0.001628	cg05845319	-0.005942	cg10316474	-0.002103	cg27116842	-0.002814	cg18284089	-0.007375	cg05999287	-0.003836	cg05892030	-0.004506	cg15488194	-0.005042	cg24675056	-0.002925	cg11082691	-0.003703
cg12753787	-0.001306	cg16722536	-0.001975	cg02958634	-0.0004142	cg16199277	-0.003547	cg19673012	-0.0009366	cg25888386	-0.001628	cg23214464	-0.005942	cg16655905	-0.002103	cg13483882	-0.002812	cg27558095	-0.007375	cg00828689	-0.003835	cg19487718	-0.004506	cg13485564	-0.005039	cg09930017	-0.002924	cg19143990	-0.003702
cg14858267	-0.001306	cg13851508	-0.001974	cg08317263	-0.0004142	cg18050291	-0.003547	cg03016991	-0.0009363	cg00828689	-0.001627	cg21487261	-0.00594	cg19859698	-0.002103	cg09355771	-0.002811	cg06254440	-0.007371	cg02527112	-0.003833	cg12224633	-0.004504	cg15821939	-0.005039	cg14420108	-0.002923	cg03139053	-0.003701
cg15153383	-0.001306	cg02925367	-0.001973	cg11088422	-0.0004142	cg11585156	-0.003546	cg20457193	-0.000936	cg07491109	-0.001627	cg25969122	-0.005938	cg01492656	-0.002102	cg20564458	-0.002811	cg11569486	-0.007371	cg24360197	-0.003833	cg21266502	-0.004504	cg14258853	-0.005038	cg04120428	-0.002922	cg10131972	-0.003701
cg16645133	-0.001306	cg17001566	-0.001973	cg00296121	-0.0004141	cg09367425	-0.003545	cg25782563	-0.000936	cg04290779	-0.001626	cg08704509	-0.005937	cg23478293	-0.002102	cg00695391	-0.002809	cg09130077	-0.007368	cg04694437	-0.003832	cg20392585	-0.004503	cg25640519	-0.005038	cg17755964	-0.002922	cg15620146	-0.003701
cg21026663	-0.001306	cg23350336	-0.001973	cg23661183	-0.0004141	cg10239098	-0.003545	cg04996918	-0.0009357	cg04009887	-0.001625	cg21215929	-0.005937	cg24830619	-0.002102	cg01780754	-0.002809	cg00483562	-0.007365	cg05507546	-0.00383	cg06933574	-0.004501	cg26685941	-0.005038	cg05441768	-0.002921	cg08281415	-0.0037
cg21472506	-0.001306	cg12462705	-0.001972	cg00232402	-0.000414	cg02899346	-0.003544	cg13501793	-0.0009353	cg24352618	-0.001625	cg23089549	-0.005936	cg02207200	-0.002101	cg06469229	-0.002809	cg07890032	-0.007364	cg09307742	-0.00383	cg00370293	-0.004499	cg18593717	-0.005037	cg09379627	-0.002921	cg07503059	-0.003699
cg06976598	-0.001305	cg03880173	-0.001971	cg26616083	-0.000414	cg23583920	-0.003543	cg02587129	-0.0009347	cg27533237	-0.001625	cg01210554	-0.005935	cg08170757	-0.002101	cg09941112	-0.002809	cg15174823	-0.007364	cg24203709	-0.00383	cg02909379	-0.004499	cg08867452	-0.005036	cg14514600	-0.002921	cg26943378	-0.003698
cg16650717	-0.001305	cg09143195	-0.001971	cg09782540	-0.0004139	cg03037150	-0.00354	cg04233717	-0.0009341	cg15202245	-0.001624	cg09696121	-0.005931	cg11236550	-0.002101	cg27570249	-0.002809	cg13790353	-0.007363	cg06768203	-0.003829	cg05191175	-0.004499	cg25502093	-0.005036	cg22772896	-0.002919	cg00018524	-0.003696
cg22989419	-0.001305	cg26483578	-0.001971	cg01459807	-0.0004136	cg09420439	-0.003539	cg26241806	-0.0009335	cg25693289	-0.001624	cg12717594	-0.005931	cg23656386	-0.002101	cg04799722	-0.002808	cg23674358	-0.007363	cg06998282	-0.003828	cg06422883	-0.004498	cg11086066	-0.005035	cg04797323	-0.002918	cg09918657	-0.003696
cg24217844	-0.001305	cg05588015	-0.00197	cg00453193	-0.0004135	cg11589139	-0.003539	cg20776829	-0.0009333	cg01237565	-0.001622	cg23478284	-0.00593	cg23821329	-0.002101	cg08624680	-0.002808	cg19380361	-0.007359	cg25058261	-0.003828	cg08299976	-0.004498	cg08446038	-0.005031	cg09615965	-0.002917	cg04597532	-0.003695
cg05075097	-0.001304	cg04685228	-0.001969	cg24259629	-0.0004135	cg21757368	-0.003538	cg24783356	-0.0009332	cg09689449	-0.001622	cg19037922	-0.005929	cg03747456	-0.002099	cg06230948	-0.002807	cg02214414	-0.007354	cg00343633	-0.003824	cg14539394	-0.004498	cg27428304	-0.00503	cg16701767	-0.002917	cg18144860	-0.003695
cg08190928	-0.001304	cg13273789	-0.001969	cg09551472	-0.0004134	cg09565404	-0.003533	cg26720913	-0.000933	cg26406907	-0.001622	cg00618312	-0.005928	cg14563196	-0.002099	ch.X.153018199F	-0.002807	cg11334818	-0.00735	cg09980622	-0.003824	cg19046725	-0.004497	cg22091037	-0.005029	cg18749015	-0.002917	cg11857093	-0.003694
cg10385382	-0.001304	cg15556943	-0.001969	cg24883709	-0.0004133	cg10960946	-0.003533	cg18075454	-0.0009327	cg03317463	-0.001621	cg11101117	-0.005926	cg27563952	-0.002099	cg08183307	-0.002806	cg02304226	-0.007349	cg06598836	-0.003823	cg04839259	-0.004496	cg06334284	-0.005027	cg03426023	-0.002916	cg16762778	-0.003694
cg02706110	-0.001303	cg19672993	-0.001969	cg05726195	-0.0004131	cg10077746	-0.003532	cg08998953	-0.0009326	cg03747456	-0.001621	cg02196651	-0.005925	cg10779423	-0.002098	cg21697198	-0.002805	cg05573381	-0.007348	cg08130572	-0.003823	cg04444771	-0.004493	cg08694699	-0.005025	cg12266841	-0.002916	cg09723781	-0.003693
cg16612998	-0.001303	cg05545672	-0.001968	cg09649610	-0.0004131	cg02691192	-0.003531	cg10944735	-0.0009326	cg07110659	-0.001621	cg15586327	-0.005925	cg00682367	-0.002097	cg09297145	-0.002804	cg05675249	-0.007347	cg11731221	-0.003822	cg18968597	-0.004493	cg10673740	-0.005023	cg10895922	-0.002915	cg14763906	-0.003691
cg18192294	-0.001303	cg12391352	-0.001968	cg00681363	-0.000413	cg05592911	-0.003531	cg17506553	-0.0009324	cg13247581	-0.001621	cg16103834	-0.00592	cg00589371	-0.002096	cg04657044	-0.002803	cg04472725	-0.007346	cg24577594	-0.003822	cg24106636	-0.004493	cg17981058	-0.005023	cg13622821	-0.002915	cg27031435	-0.003691
cg19965221	-0.001303	cg26127778	-0.001968	cg08554257	-0.000413	cg14212266	-0.003529	cg11161846	-0.0009321	cg22525212	-0.001621	cg21732383	-0.00592	cg22538396	-0.002096	cg03979206	-0.002801	cg16547579	-0.007344	cg17382198	-0.003821	cg24875854	-0.00449	cg11291081	-0.005022	cg01443426	-0.002912	cg07602980	-0.00369
cg03342208	-0.001302	cg00642209	-0.001967	cg19523213	-0.0004129	cg08340572	-0.003526	cg25082959	-0.0009321	cg26835302	-0.001621	cg19650157	-0.005919	cg25994931	-0.002095	cg05645404	-0.002801	cg07161369	-0.007343	cg10880459	-0.003819	cg27160130	-0.00449	cg01273287	-0.005021	cg16997732	-0.002912	cg27453365	-0.00369
cg04143750	-0.001302	cg14657525	-0.001967	cg08799922	-0.0004128	cg13498289	-0.003526	cg04174211	-0.000932	cg00630724	-0.00162	cg24203709	-0.005919	cg00478874	-0.002094	cg23161317	-0.0028	cg03930964	-0.007342	cg04699460	-0.003818	cg21140714	-0.004489	cg19160520	-0.005021	cg22514863	-0.002912	cg12014333	-0.003689
cg13589330	-0.001302	cg23943360	-0.001967	cg14173599	-0.0004128	cg15954235	-0.003526	cg06197769	-0.0009319	cg02417084	-0.00162	cg01040585	-0.005918	cg05960677	-0.002094	cg03085712	-0.002798	cg16716750	-0.007341	cg11836236	-0.003815	cg24610274	-0.004489	cg27381274	-0.005021	cg07201215	-0.002911	cg22814884	-0.003688
cg15340644	-0.001302	cg09805405	-0.001965	cg23359810	-0.0004127	cg07394455	-0.003525	cg02767960	-0.0009313	cg06861572	-0.00162	cg06956048	-0.005918	cg26303165	-0.002094	cg11595135	-0.002798	cg16782807	-0.007341	cg08970347	-0.003814	cg26988617	-0.004488	cg23446109	-0.005018	cg15678844	-0.002911	cg24030630	-0.003688
cg22697364	-0.001302	cg12307823	-0.001965	cg14785681	-0.0004126	cg09929564	-0.003525	cg01016521	-0.0009311	cg11594940	-0.00162	cg02417084	-0.005916	cg16199277	-0.002093	cg25717182	-0.002797	cg25018801	-0.007337	cg06212224	-0.003812	cg19672993	-0.004487	cg19413392	-0.005017	cg04789589	-0.00291	cg18228456	-0.003687
cg26597727	-0.001302	cg17483510	-0.001965	cg18255595	-0.0004124	cg16577002	-0.003525	cg20631750	-0.0009309	cg22460206	-0.00162	cg11161846	-0.005916	cg16086373	-0.002092	cg00531628	-0.002796	cg17187559	-0.007336	cg25179291	-0.003812	cg21758133	-0.004486	cg25868286	-0.005016	cg11509269	-0.002909	cg23090632	-0.003685
cg03958757	-0.001301	cg23407970	-0.001965	cg14246617	-0.0004123	cg16942681	-0.003525	cg17732044	-0.0009306	cg23684521	-0.00162	cg16716750	-0.005915	cg20564458	-0.002092	cg01901107	-0.002796	cg13506058	-0.007334	cg12855166	-0.003811	cg00586317	-0.004484	cg17976576	-0.005014	cg15596816	-0.002909	cg26464887	-0.003685
cg05207834	-0.001301	cg10307145	-0.001964	cg24921089	-0.0004123	cg19049607	-0.003523	cg18937330	-0.00093	cg26026416	-0.00162	cg09496915	-0.005914	cg20340508	-0.002091	cg27037103	-0.002796	cg03584113	-0.007332	cg02413850	-0.00381	cg25131544	-0.004484	cg25452974	-0.005013	cg06350544	-0.002908	cg21589273	-0.003684
cg11430077	-0.001301	cg00662122	-0.001963	cg12621171	-0.0004122	cg03203320	-0.003522	cg12356890	-0.0009299	cg00145177	-0.001619	cg02163885	-0.005912	cg18020955	-0.00209	cg01505275	-0.002795	cg04276084	-0.007328	cg14657834	-0.00381	cg02507578	-0.004483	cg21794428	-0.005012	cg24129626	-0.002907	cg26744387	-0.003683
cg18855674	-0.001301	cg02031769	-0.001963	cg10040922	-0.0004121	cg08172445	-0.003522	cg13605172	-0.0009294	cg05839377	-0.001619	cg20643952	-0.005909	cg18263166	-0.00209	cg03218019	-0.002794	cg08786829	-0.007328	cg15184687	-0.003809	cg12105450	-0.004483	cg10825398	-0.005008	cg15971836	-0.002905	cg08681519	-0.003681
cg21516287	-0.001301	cg08835221	-0.001963	cg15471815	-0.0004121	cg12913097	-0.003522	cg09696121	-0.0009293	cg05893300	-0.001619	cg04736112	-0.005907	cg20643952	-0.00209	cg13486755	-0.002793	cg09253931	-0.007327	cg07971674	-0.003808	cg11402586	-0.004481	cg26457761	-0.005008	cg14034852	-0.002903	cg11526848	-0.003681
cg26342671	-0.001301	cg04486019	-0.001962	cg21447117	-0.0004121	cg15089487	-0.003521	cg05156137	-0.0009289	cg12728517	-0.001619	cg18946473	-0.005906	ch.X.1023208F	-0.00209	cg19120897	-0.002791	cg18363192	-0.007326	cg03584113	-0.003806	cg20009101	-0.004481	cg01447281	-0.005004	cg26361757	-0.002903	cg13898357	-0.003681
cg13273789	-0.0013	cg13154104	-0.001961	cg17404915	-0.0004119	cg15804767	-0.00352	cg09265173	-0.0009289	cg00396484	-0.001618	cg19216198	-0.005906	cg22606224	-0.002089	cg17220677	-0.00279	cg19422030	-0.007323	cg09077934	-0.003806	cg26258273	-0.004481	cg13466128	-0.005004	cg03451212	-0.002902	cg04455137	-0.00368
cg24307440	-0.0013	cg09680447	-0.00196	cg18150120	-0.0004118	cg16335762	-0.003519	cg12137194	-0.0009289	cg16910830	-0.001618	cg25890168	-0.005906	cg01043119	-0.002088	cg15084390	-0.002789	cg15853117	-0.007321	cg25479708	-0.003806	cg27563952	-0.004481	cg18480233	-0.005004	cg15336765	-0.002902	cg04609859	-0.00368
cg05829479	-0.001299	cg10416963	-0.00196	cg19516279	-0.0004118	cg06490869	-0.003517	cg09166091	-0.0009288	cg01154966	-0.001617	cg07200280	-0.005905	cg08522143	-0.002088	cg23967554	-0.002787	cg14982203	-0.007319	cg03680032	-0.003805	cg04890576	-0.00448	cg03061352	-0.005003	cg19438860	-0.002902	cg06154060	-0.00368
cg06487301	-0.001299	cg13453904	-0.00196	cg11749828	-0.0004117	cg21039631	-0.003516	cg09647147	-0.0009288	cg04871582	-0.001617	cg11406050	-0.005896	cg13510327	-0.002088	cg27015931	-0.002787	cg26269613	-0.007319	cg24037916	-0.003805	cg05977551	-0.004478	cg20596240	-0.005003	cg19672993	-0.002902	cg12079303	-0.00368
cg10714284	-0.001299	cg17602167	-0.001959	cg13442428	-0.0004117	cg22470850	-0.003516	cg00323305	-0.0009283	cg07420163	-0.001617	cg20669012	-0.005895	cg13847066	-0.002087	cg02577122	-0.002786	cg23305408	-0.007318	cg26315964	-0.003805	cg02458065	-0.004477	cg05675249	-0.005	cg18769818	-0.0029	cg24065328	-0.003677
cg13600477	-0.001299	cg13483882	-0.001958	cg09272948	-0.0004116	cg20681068	-0.003514	cg25157280	-0.0009282	cg15187550	-0.001617	cg02344943	-0.005893	cg25181507	-0.002087	cg13134535	-0.002785	cg23588086	-0.007317	cg20701689	-0.003803	cg10576725	-0.004477	cg15094236	-0.004999	cg03172651	-0.002899	cg26728709	-0.003677
cg27068490	-0.001299	cg26069719	-0.001958	cg09704750	-0.0004116	cg12911732	-0.003512	cg07470207	-0.000928	cg00262446	-0.001616	cg12610867	-0.005893	cg27427514	-0.002086	cg20383155	-0.002785	cg14776518	-0.007316	cg20641465	-0.003802	cg21968765	-0.004476	cg18855080	-0.004998	cg05867154	-0.002899	cg02882044	-0.003675
cg00940502	-0.001298	cg13782932	-0.001957	cg23942980	-0.0004116	cg01114088	-0.003511	cg06303288	-0.0009277	cg19395441	-0.001616	cg20430847	-0.005893	cg01434562	-0.002085	cg09508531	-0.002783	cg13257636	-0.007314	cg24865623	-0.003802	cg16122072	-0.004475	cg02378269	-0.004997	cg17507671	-0.002899	cg04432319	-0.003674
cg01020263	-0.001298	cg20481909	-0.001957	cg07367232	-0.0004115	cg07476617	-0.00351	cg20414262	-0.0009277	cg00030422	-0.001615	cg11861709	-0.005892	cg05148373	-0.002085	cg20250126	-0.002783	cg14693391	-0.007309	cg25033817	-0.003802	cg26150462	-0.004475	cg04261248	-0.004996	cg10925082	-0.002898	cg08205361	-0.003673
cg03281561	-0.001298	cg20585088	-0.001956	cg10143426	-0.0004115	cg00638090	-0.003509	cg02705918	-0.0009275	cg09089242	-0.001615	cg15423357	-0.005892	cg11029634	-0.002085	cg02897005	-0.002782	cg27624424	-0.007307	cg13919466	-0.003801	cg06107816	-0.004474	cg22790973	-0.004996	cg22625415	-0.002897	cg19869746	-0.003673
cg02948624	-0.001297	cg09577426	-0.001955	cg09871669	-0.0004114	cg08572535	-0.003509	cg23033785	-0.0009274	cg26324132	-0.001615	cg14675361	-0.005887	cg18451310	-0.002085	cg08149193	-0.002782	cg17186727	-0.007305	cg24652679	-0.003801	cg21026663	-0.004473	cg23922454	-0.004996	cg06511389	-0.002896	cg24997562	-0.003673
cg04144394	-0.001297	cg00218447	-0.001954	cg12806763	-0.0004114	cg19811123	-0.003509	cg05739476	-0.0009273	cg09152259	-0.001614	cg16561266	-0.005886	cg23395449	-0.002084	cg05867154	-0.002781	cg00579036	-0.007304	cg05893300	-0.0038	cg04525491	-0.004472	cg13175981	-0.004994	cg24793124	-0.002896	cg19221841	-0.003672
cg18758906	-0.001297	cg13071476	-0.001954	cg00408026	-0.0004113	cg11467638	-0.003506	cg05260062	-0.000927	cg02294764	-0.001613	cg01228636	-0.005883	cg24932686	-0.002084	cg10543450	-0.002781	cg23227931	-0.007304	cg07365127	-0.003798	cg13545897	-0.004472	cg18352516	-0.004994	cg13269407	-0.002895	cg21140714	-0.003672
cg21340148	-0.001297	cg13991233	-0.001954	cg19722847	-0.0004113	cg27127903	-0.003505	cg11111460	-0.0009268	cg21686694	-0.001613	cg09543478	-0.005883	cg25378003	-0.002084	cg04996689	-0.00278	cg24166893	-0.007304	cg19112895	-0.003797	cg14284211	-0.004472	cg00606464	-0.004993	cg17176732	-0.002895	cg01381636	-0.003671
cg07325233	-0.001296	cg10333808	-0.001953	cg04971362	-0.0004111	cg05350188	-0.003504	cg12708336	-0.0009267	cg22827124	-0.001613	cg03623982	-0.005882	cg05314679	-0.002083	cg07160163	-0.00278	cg07807026	-0.007303	cg11491749	-0.003794	cg18736101	-0.004471	cg20933634	-0.004993	cg19048426	-0.002895	cg15262242	-0.003671
cg09112687	-0.001296	cg17820591	-0.001953	cg08122140	-0.0004111	cg22550549	-0.003503	cg16417447	-0.0009267	cg27117005	-0.001613	cg02012576	-0.005881	cg24333845	-0.002083	cg21979724	-0.00278	cg19037922	-0.007302	cg24828455	-0.003792	cg04064583	-0.00447	cg13604020	-0.004989	cg27406975	-0.002895	cg23847017	-0.00367
cg11362010	-0.001296	cg01765249	-0.001952	cg22517836	-0.0004111	cg11861986	-0.003502	cg25181507	-0.000926	cg00525011	-0.001612	cg04596060	-0.005881	cg10398774	-0.002082	cg06375761	-0.002779	cg20455131	-0.007301	cg04614296	-0.003791	cg12145080	-0.00447	cg17317962	-0.004988	cg01269795	-0.002893	cg04921989	-0.003668
cg13483882	-0.001296	cg03609666	-0.001952	cg23521835	-0.000411	cg13683218	-0.003502	cg05724997	-0.0009259	cg12439977	-0.001612	cg09657963	-0.005881	ch.X.68408155R	-0.002081	cg09432234	-0.002779	cg15219347	-0.007299	cg01635193	-0.00379	cg24631482	-0.00447	cg03735847	-0.004986	cg06693487	-0.002893	cg05019826	-0.003667
cg13580286	-0.001296	cg04564030	-0.001952	cg24570303	-0.000411	cg15819646	-0.003502	cg05795931	-0.0009258	cg19669036	-0.001612	cg18900271	-0.00588	cg00778807	-0.00208	cg05770946	-0.002778	cg06980547	-0.007298	cg16666964	-0.00379	cg00339104	-0.004469	cg13530621	-0.004986	cg10633838	-0.002892	cg06320134	-0.003667
cg15487105	-0.001296	cg12995941	-0.001951	cg08745498	-0.0004108	cg15057434	-0.003501	cg08230658	-0.0009258	cg23029715	-0.001612	cg14210607	-0.005879	cg08909806	-0.00208	cg03935432	-0.002777	cg11568368	-0.007298	cg18101249	-0.003788	cg00906319	-0.004466	ch.X.42854404F	-0.004984	cg27283993	-0.002892	cg25121513	-0.003667
cg23671997	-0.001296	cg16412956	-0.001951	cg11236727	-0.0004108	cg13885343	-0.0035	cg09486861	-0.0009258	cg26315263	-0.001612	cg21032292	-0.005874	cg14606256	-0.00208	cg04411841	-0.002777	cg17243364	-0.007296	cg26052635	-0.003788	cg22956254	-0.004466	cg21446102	-0.004983	cg09109122	-0.002891	cg01141580	-0.003666
cg01255894	-0.001295	cg19381811	-0.001951	cg12256538	-0.0004108	cg11870037	-0.003499	cg11344352	-0.0009258	cg03287340	-0.001611	cg04228935	-0.005872	cg18456523	-0.00208	cg07216425	-0.002777	cg22108259	-0.007296	cg26361757	-0.003787	cg07368069	-0.004465	cg23347429	-0.004983	cg09148649	-0.002891	cg04048802	-0.003666
cg02513449	-0.001295	cg06409432	-0.00195	cg26906217	-0.0004108	cg20589862	-0.003499	cg18277986	-0.0009258	cg06829366	-0.001611	cg06254440	-0.005872	cg22681784	-0.00208	cg00051483	-0.002776	cg03333590	-0.007295	cg10576725	-0.003785	cg24114154	-0.004465	cg12996903	-0.004982	cg14450605	-0.002891	cg09932135	-0.003665
cg09931450	-0.001295	cg09350341	-0.00195	cg04521957	-0.0004106	cg05121987	-0.003497	cg20979153	-0.0009254	cg09056501	-0.001611	cg05893300	-0.005869	cg23165899	-0.00208	cg15618108	-0.002776	cg11150901	-0.007293	cg12962021	-0.003784	cg08751352	-0.004464	cg16521978	-0.004982	cg22074858	-0.002891	cg16750801	-0.003665
cg18852567	-0.001295	cg10357151	-0.00195	cg06927775	-0.0004105	cg15093194	-0.003497	cg13767001	-0.0009253	cg17572800	-0.001611	cg08302325	-0.005869	cg02069738	-0.002078	cg19132069	-0.002775	cg24559983	-0.007291	cg17173451	-0.003784	cg23130076	-0.004464	cg11743054	-0.004981	cg23296010	-0.002891	cg00887511	-0.003664
cg22001496	-0.001295	cg10548034	-0.00195	cg18403551	-0.0004105	cg20997159	-0.003495	cg08647349	-0.0009251	cg21869956	-0.001611	cg20956278	-0.005869	cg06805557	-0.002078	cg20621021	-0.002775	cg25533247	-0.007291	cg04568797	-0.00378	cg03626739	-0.004463	cg16624272	-0.004981	cg19051416	-0.00289	cg05892030	-0.003663
cg05019826	-0.001294	cg01070078	-0.001949	cg06282270	-0.0004104	cg26657240	-0.003495	cg03854765	-0.0009247	cg24165760	-0.001611	cg01447281	-0.005866	cg14210607	-0.002078	cg23515460	-0.002774	cg11462315	-0.007289	cg19984146	-0.00378	cg03205140	-0.004462	cg07381000	-0.00498	cg21116783	-0.00289	cg03244036	-0.003662
cg07359545	-0.001294	cg06472341	-0.001949	cg07016483	-0.0004104	cg10230711	-0.003494	cg14155397	-0.0009245	cg27107970	-0.001611	cg03717961	-0.005866	cg14215459	-0.002078	cg03065202	-0.002773	cg23963595	-0.007288	ch.X.253162F	-0.00378	cg06680397	-0.004461	cg18051461	-0.00498	cg25113089	-0.002889	cg04212239	-0.003661
cg27310092	-0.001294	cg13957558	-0.001949	cg02710571	-0.0004103	cg20865323	-0.003494	cg17191919	-0.0009243	cg06618629	-0.00161	cg21979724	-0.005864	cg16393012	-0.002078	cg05726195	-0.002773	cg08253704	-0.007284	cg00181054	-0.003779	cg15555970	-0.004461	cg25282285	-0.00498	cg10508639	-0.002888	cg10088041	-0.003661
cg06204948	-0.001293	cg16216148	-0.001949	cg10393598	-0.0004102	cg13975660	-0.003493	cg18343292	-0.0009241	cg14928734	-0.00161	cg06297145	-0.005862	cg01269795	-0.002077	cg07941983	-0.002773	cg08564661	-0.007284	cg00257455	-0.003779	cg04319606	-0.00446	cg11522201	-0.004978	cg27392024	-0.002888	cg17753496	-0.00366
cg09072408	-0.001293	cg21502048	-0.001949	cg11854659	-0.00041	cg06472065	-0.003491	cg23967554	-0.0009238	cg02466588	-0.001609	cg11185792	-0.005862	cg23015138	-0.002076	cg09763162	-0.002773	cg17239236	-0.007283	cg21603914	-0.003779	cg25908973	-0.004458	cg26932441	-0.004978	cg11026333	-0.002887	cg20885179	-0.00366
cg17510056	-0.001293	cg22224337	-0.001948	cg17940013	-0.00041	cg01053463	-0.00349	cg02531479	-0.0009236	cg06197769	-0.001609	cg09411730	-0.005861	cg23190089	-0.002076	cg23214464	-0.002773	cg00222995	-0.007282	cg23847701	-0.003779	cg07476617	-0.004456	cg16716750	-0.004976	cg13014531	-0.002887	cg15896098	-0.003658
cg20561863	-0.001293	cg05984554	-0.001947	cg21878650	-0.00041	cg02413850	-0.003489	cg25734572	-0.0009236	cg07190763	-0.001609	cg12498580	-0.005861	cg01443426	-0.002075	cg04581613	-0.002772	cg13795448	-0.007282	cg19702675	-0.003778	cg00399596	-0.004455	cg05490659	-0.004975	cg21865533	-0.002887	cg27086308	-0.003658
cg21586412	-0.001293	cg07176034	-0.001947	cg11095319	-0.0004099	cg17043722	-0.003489	cg16103712	-0.0009233	cg08262220	-0.001609	cg13683218	-0.005857	cg11018337	-0.002075	cg02331902	-0.00277	cg18214661	-0.007282	cg19965941	-0.003777	cg27279991	-0.004454	cg20489026	-0.004973	cg23068731	-0.002886	cg14351425	-0.003657
cg23606623	-0.001293	cg11258404	-0.001947	cg13702222	-0.0004098	cg24504423	-0.003489	cg06484360	-0.0009229	cg16076038	-0.001609	cg00233307	-0.005856	cg06732666	-0.002074	cg03468249	-0.002768	cg20701689	-0.007281	cg16122072	-0.003776	cg00306298	-0.004453	cg06281680	-0.004972	cg04624601	-0.002885	cg21484174	-0.003657
cg03892356	-0.001292	cg05245070	-0.001946
